# Supplementary material
Source: Research Square preprint supplement (doi:10.21203/rs.3.rs-8434940/v1)
Supplement: Supplementary file 1 [file 4a34ae33153c88781caedd29.docx]

**Supplement methods**

**Study design**

**Samples collection**

Oral and perianal swabs were collected using sterile swab sticks. Each swab was placed in a sterile transport medium and immediately stored at -80°C until processing. This approach aims to capture the diversity of the microbial community and its potential correlation with treatment response.

All patients were screened for carbapenems-resistant organism (CRO) colonization on admission and weekly in our hospital. Briefly, oral and rectal swabs are plated on selective media to determine the presence of CRO pathogens, primarily including CRE, and CRPA.

The primary outcome was CRO colonization. The second outcomes included the positive blood culture and all-cause mortality events in the follow-up period. Clinical, microbiological, and treatment-related data were systematically collected. Antibiotic susceptibility testing was performed in the hospital's microbiology laboratory using an automated system (VITEK 2 Compact) with broth microdilution and disk diffusion methods. Antibiotic susceptibilities were defined according to the Clinical and Laboratory Standards Institute (CLSI) M100 guidelines. Patients were recruited in accordance with ethical guidelines. Longitudinal cohort’s clinical data were seen in Table s3 in detail.

**16SrRNA sequencing analysis**

16S rRNA genes of distinct regions (16S V3/V4) were amplified by means of polymerase chain reaction (PCR) used specific primer with the barcode. The phylogenetic relationship was constructed on each ASV and the differences of the dominant species among different groups. Top 15 taxa of each group at each taxonomic ranks (phylum, family) were selected to plot the distribution histogram of relative abundance in Perl through SVG function. Venn and Flower diagrams visually display the common and unique information between different groups. Shannon Diversity Index Calculation: To evaluate alpha diversity, we computed the Shannon diversity index for each sample.

This index provided insights into the diversity and evenness of microbial communities across samples and time points.

Mean Species Abundance Calculation: For each group and time category, the mean relative abundance of the top five most abundant species (ASVs) was calculated. Samples were categorized into time points (0, 1, 2, 3, and 3+) and further subdivided into remission and non-remission groups. The mean abundance of each ASV was calculated to allow for a comparison of key species composition across groups and time points.

Bray-Curtis Dissimilarity Calculation: To assess the microbial community compositional changes over time, the Bray-Curtis dissimilarity was computed between oral and gut samples within each individual at each time point. This dissimilarity index quantified the compositional similarity between the two sample types, indicating convergence or divergence in microbiota structure. Samples lacking either oral or gut data for a specific time point were excluded from the analysis.

Dynamic Time Warping (DTW) and Clustering Analysis: To identify similar temporal patterns in microbial composition between remission and non-remission groups, DTW-based unsupervised clustering was applied. ASV abundance trajectories across time points were analyzed to determine the degree of alignment between time-series patterns, clustering samples with similar temporal dynamics. This analysis helped in identifying distinct community shifts associated with each group.

The functional biomarkers were calculated with LefSe based on the PICRUST2. A genus-level network diagram illustrated symbiotic relationships. Correlations between environmental factors and species abundance were analyzed using Spearman correlation, CCA. PICRUST2 platform was used to do the functional marker analysis (<http://picrust.github.io/picrust/tutorials/algorithm_description.html>).

**Statistical analyses**

Multivariate logistic regression analysis was performed to identify the risk factors for 30-day mortality and multidrug-resistant infections. Prior to the multivariate analysis, we included all variables with significant findings in the univariate analysis (p<0.05) and performed interaction tests for the included variables. Variables with a variance inflation factor (VIF) greater than 5 were excluded to address multicollinearity issues. After this step, the final multivariate regression model was developed to identify independent risk factors. We established an ‘exposure–mediator–outcome’ model[15], considering the relapsed/refractory acute leukemia as the exposure and CRO infection as the outcome. In this model, we viewed the CRO colonization, hospital stay, and hypoproteinemia as mediators. The total effect of exposure was divided into the ‘direct effect’ and the ‘indirect effect’ through the mediators. We performed a model-based causal mediation analysis to calculate the proportion of the ‘indirect effect’ and its 95% confidence interval (simulated using the quasi-Bayesian Monte Carlo method based on normal approximation). Covariates included age, gender, diseases, chemotherapy, allo-HSCT, and prior antibiotic use.
