# Supplementary material
Source: Research Square preprint supplement (doi:10.21203/rs.3.rs-8434940/v1)
Supplement: Supplementary file 2 [file 9a01e597df7446967b6a0bde.xlsx]

## Sheet: metadata_os
ID	time_points	sample_id	age	stage	is_remission	Fever	BSI	CROCO	ATB_treat	sex	disease	treatment_pattern	sample_date
1	0	p1aOS	54	0	0	1	0	1	1	1	0	0	2023-07-16
1	1	p1bOS	54	2	0	1	0	0	1	1	0	0	2023-08-22
1	2	p1cOS	54	1	1	0	0	0	1	1	0	0	2023-08-30
1	3	p1dOS	54	1	1	1	0	0	0	1	0	0	2023-10-27
1	4	p1eOS	54	1	1	1	1	0	1	1	0	0	2023-12-06
2	0	p2aOS	16	0	0	1	0	0	1	1	0	0	2023-07-17
2	1	p2bOS	16	1	1	1	0	0	0	1	0	0	2023-09-08
2	2	p2cOS	16	1	1	1	0	0	1	1	0	0	2023-09-19
2	3	p2dOS	16	1	1	0	0	0	0	1	0	0	2023-10-22
2	4	p2eOS	16	1	1	1	0	0	1	1	0	0	2023-11-09
3	0	IN3.OS	26	0	0	1	0	0	0	1	0	0	2023-07-19
3	1	p3bOS	26	1	1	0	0	0	1	1	0	0	2023-09-06
3	2	p3cOS	26	1	1	0	0	0	0	1	0	0	2023-10-27
3	3	p3dOS	26	1	1	0	0	0	0	1	0	0	2023-12-18
4	0	p4aOS	54	0	0	0	0	0	0	1	0	0	2023-07-21
4	1	p4bOS	54	1	1	1	1	0	1	1	0	0	2023-09-01
4	2	p4cOS	54	1	1	1	0	0	1	1	0	0	2023-09-13
4	3	p4dOS	54	1	1	0	1	0	1	1	0	0	2023-10-27
5	0	p5aOS	25	0	0	0	0	0	0	0	1	0	2023-07-26
5	1	p5bOS	25	1	1	1	1	0	1	0	1	0	2023-09-11
5	2	p5cOS	25	1	1	1	0	0	1	0	1	0	2023-09-26
6	0	p6aOS	22	0	0	1	0	0	1	1	0	0	2023-08-16
6	1	p6bOS	22	1	1	1	1	0	1	1	0	0	2023-09-26
6	2	p6cOS	22	1	1	1	0	0	1	1	0	0	2023-10-07
6	3	p6dOS	22	1	1	1	0	0	1	1	0	0	2023-10-24
6	4	p6eOS	22	1	1	1	0	0	1	1	0	0	2023-12-01
7	0	p7aOS	54	0	0	1	0	1	1	0	0	1	2023-08-16
7	1	p7bOS	54	2	0	0	0	1	0	0	0	1	2023-09-06
7	2	p7cOS	54	2	0	1	0	1	1	0	0	1	2023-10-09
7	3	p7dOS	54	2	0	1	0	0	1	0	0	1	2023-10-24
7	4	p7eOS	54	1	1	1	0	0	1	0	0	1	2023-11-07
9	0	p9aOS	43	0	0	1	0	0	1	0	0	1	2023-08-22
9	1	p9bOS	43	2	0	1	1	0	1	0	0	1	2023-09-06
9	2	p9cOS	43	2	0	1	0	1	1	0	0	1	2023-10-07
9	3	p9dOS	43	2	0	1	0	0	1	0	0	1	2023-10-17
9	4	p9eOS	43	1	1	0	0	0	0	0	0	1	2023-11-13
10	0	p10aOS	48	0	0	1	0	0	1	1	0	0	2023-08-22
10	1	p10bOS	48	1	1	1	0	0	1	1	0	0	2023-09-13
10	2	p10cOS	48	1	1	1	0	0	1	1	0	0	2023-12-08
10	3	p10dOS	48	1	1	1	0	0	1	1	0	0	2023-12-18
11	0	p11aOS	31	0	0	0	0	0	0	1	1	0	2023-08-22
11	1	p11bOS	31	1	1	0	0	0	0	1	1	0	2023-09-11
11	2	p11cOS	31	1	1	0	0	0	0	1	1	0	2023-10-17
11	3	p11dOS	31	1	1	1	0	0	1	1	1	0	2024-01-04
11	4	p11eOS	31	1	1	1	0	0	1	1	1	0	2024-01-22
13	0	p13aOS	26	0	0	1	0	0	1	0	0	1	2023-08-28
13	1	p13cOS	26	2	0	1	0	0	1	0	0	1	2023-10-08
13	2	p13dOS	26	2	0	1	0	0	1	0	0	1	2023-10-17
13	3	p13eOS	26	2	0	1	0	0	1	0	0	1	2023-12-06
14	0	p14aOS	57	0	0	1	0	0	1	0	0	0	2023-08-30
14	1	p14bOS	57	1	1	0	0	0	0	0	0	0	2023-09-13
14	2	p14cOS	57	1	1	0	1	0	0	0	0	0	2023-09-26
14	3	p14dOS	57	1	1	0	0	0	0	0	0	0	2023-10-17
14	4	p14eOS	57	1	1	0	0	0	0	0	0	0	2023-11-07
14	5	p14fOS	57	1	1	1	0	0	1	0	0	0	2023-12-18
15	0	p15aOS	18	0	0	1	0	0	1	0	1	0	2023-09-07
15	1	p15bOS	18	1	1	0	0	0	1	0	1	0	2023-09-26
15	2	p15cOS	18	1	1	0	0	0	0	0	1	0	2023-10-09
15	3	p15dOS	18	1	1	1	1	0	1	0	1	0	2023-10-24
16	0	p16aOS	37	0	0	1	0	0	1	0	0	0	2023-09-19
16	1	p16bOS	37	1	1	1	0	0	1	0	0	0	2023-10-07
16	2	p16cOS	37	1	1	1	0	0	1	0	0	0	2023-11-07
16	3	p16dOS	37	1	1	1	0	0	1	0	0	0	2023-11-23
17	0	p17aOS	50	0	0	1	0	0	1	0	0	1	2023-09-27
17	1	p17bOS	50	2	0	1	0	0	1	0	0	1	2023-10-08
17	2	p17cOS	50	2	0	1	1	0	1	0	0	1	2023-10-31
17	3	p17dOS	50	1	1	1	0	0	1	0	0	1	2023-11-23
17	4	p17eOS	50	1	1	1	0	0	1	0	0	1	2023-12-09
18	0	p18aOS	41	0	0	1	0	0	1	1	1	0	2023-09-27
18	1	p18bOS	41	1	1	1	0	1	1	1	1	0	2023-10-17
19	0	p19aOS	21	0	0	1	0	0	1	1	1	0	2023-10-08
19	1	p19bOS	21	1	1	1	0	1	1	1	1	0	2023-10-31
20	0	p20aOS	58	0	0	1	1	0	1	1	0	0	2023-10-12
20	1	p20bOS	58	1	1	1	1	0	1	1	0	0	2023-10-31

## Sheet: metadata_ps
ID	time_points	sample_id	age	stage	is_remission	Fever	BSI	CROCO	ATB_treat	sex	disease	treatment_pattern	sample_date
1	0	p1aPS	54	0	0	1	0	1	1	1	0	0	2023-07-16
1	1	p1bPS	54	2	0	1	0	0	1	1	0	0	2023-08-22
1	2	p1cPS	54	1	1	0	0	0	1	1	0	0	2023-08-30
1	3	p1dPS	54	1	1	1	0	0	0	1	0	0	2023-10-27
1	4	p1ePS	54	1	1	1	1	0	1	1	0	0	2023-12-06
2	0	p2aPS	16	0	0	1	0	0	1	1	0	0	2023-07-17
2	1	p2bPS	16	1	1	1	0	0	0	1	0	0	2023-09-08
2	2	p2cPS	16	1	1	1	0	0	1	1	0	0	2023-09-19
2	3	p2dPS	16	1	1	0	0	0	0	1	0	0	2023-10-22
2	4	p2ePS	16	1	1	1	0	0	1	1	0	0	2023-11-09
3	1	p3bPS	26	1	1	0	0	0	1	1	0	0	2023-09-06
3	2	p3cPS	26	1	1	0	0	0	0	1	0	0	2023-10-27
3	3	p3dPS	26	1	1	0	0	0	0	1	0	0	2023-12-18
4	0	p4aPS	54	0	0	0	0	0	0	1	0	0	2023-07-21
4	1	p4bPS	54	1	1	1	1	0	1	1	0	0	2023-09-01
4	2	p4cPS	54	1	1	1	0	0	1	1	0	0	2023-09-13
4	3	p4dPS	54	1	1	0	1	0	1	1	0	0	2023-10-27
5	0	p5aPS	25	0	0	0	0	0	0	0	1	0	2023-07-26
5	1	p5bPS	25	1	1	1	1	0	1	0	1	0	2023-09-11
5	2	p5cPS	25	1	1	1	0	0	1	0	1	0	2023-09-26
6	0	p6aPS	22	0	0	1	0	0	1	1	0	0	2023-08-16
6	1	p6bPS	22	1	1	1	1	0	1	1	0	0	2023-09-26
6	2	p6cPS	22	1	1	1	0	0	1	1	0	0	2023-10-07
6	3	p6dPS	22	1	1	1	0	0	1	1	0	0	2023-10-24
6	4	p6ePS	22	1	1	1	0	0	1	1	0	0	2023-12-01
7	0	p7aPS	54	0	0	1	0	1	1	0	0	1	2023-08-16
7	1	p7bPS	54	2	0	0	0	1	0	0	0	1	2023-09-06
7	2	p7cPS	54	2	0	1	0	1	1	0	0	1	2023-10-09
7	3	p7dPS	54	2	0	1	0	0	1	0	0	1	2023-10-24
7	4	p7ePS	54	1	1	1	0	0	1	0	0	1	2023-11-07
9	1	p9bPS	43	2	0	1	1	0	1	0	0	1	2023-09-06
9	2	p9cPS	43	2	0	1	0	1	1	0	0	1	2023-10-07
9	3	p9dPS	43	2	0	1	0	0	1	0	0	1	2023-10-17
9	4	p9ePS	43	1	1	0	0	0	0	0	0	1	2023-11-13
10	0	p10aPS	48	0	0	1	0	0	1	1	0	0	2023-08-22
10	1	p10bPS	48	1	1	1	0	0	1	1	0	0	2023-09-13
10	2	p10cPS	48	1	1	1	0	0	1	1	0	0	2023-12-08
10	3	p10dPS	48	1	1	1	0	0	1	1	0	0	2023-12-18
11	0	p11aPS	31	0	0	0	0	0	0	1	1	0	2023-08-22
11	1	p11bPS	31	1	1	0	0	0	0	1	1	0	2023-09-11
11	2	p11cPS	31	1	1	0	0	0	0	1	1	0	2023-10-17
11	3	p11dPS	31	1	1	1	0	0	1	1	1	0	2024-01-04
11	4	p11ePS	31	1	1	1	0	0	1	1	1	0	2024-01-22
13	0	p13aPS	26	0	0	1	0	0	1	0	0	1	2023-08-28
13	1	p13cPS	26	2	0	1	0	0	1	0	0	1	2023-10-08
13	2	p13dPS	26	2	0	1	0	0	1	0	0	1	2023-10-17
13	3	p13ePS	26	2	0	1	0	0	1	0	0	1	2023-12-06
14	0	p14aPS	57	0	0	1	0	0	1	0	0	0	2023-08-30
14	1	p14bPS	57	1	1	0	0	0	0	0	0	0	2023-09-13
14	2	p14cPS	57	1	1	0	1	0	0	0	0	0	2023-09-26
14	3	p14dPS	57	1	1	0	0	0	0	0	0	0	2023-10-17
14	4	p14ePS	57	1	1	0	0	0	0	0	0	0	2023-11-07
14	5	p14fPS	57	1	1	1	0	0	1	0	0	0	2023-12-18
15	0	p15aPS	18	0	0	1	0	0	1	0	1	0	2023-09-07
15	1	p15bPS	18	1	1	0	0	0	1	0	1	0	2023-09-26
15	2	p15cPS	18	1	1	0	0	0	0	0	1	0	2023-10-09
16	0	p16aPS	37	0	0	1	0	0	1	0	0	0	2023-09-19
16	1	p16bPS	37	1	1	1	0	0	1	0	0	0	2023-10-07
16	2	p16cPS	37	1	1	1	0	0	1	0	0	0	2023-11-07
16	3	p16dPS	37	1	1	1	0	0	1	0	0	0	2023-11-23
17	0	p17aPS	50	0	0	1	0	0	1	0	0	1	2023-09-27
17	1	p17bPS	50	2	0	1	0	0	1	0	0	1	2023-10-08
17	2	p17cPS	50	2	0	1	1	0	1	0	0	1	2023-10-31
17	3	p17dPS	50	1	1	1	0	0	1	0	0	1	2023-11-23
18	0	p18aPS	41	0	0	1	0	0	1	1	1	0	2023-09-27
18	1	p18bPS	41	1	1	1	0	1	1	1	1	0	2023-10-17
19	0	p19aPS	21	0	0	1	0	0	1	1	1	0	2023-10-08
19	1	p19bPS	21	1	1	1	0	1	1	1	1	0	2023-10-31
20	0	p20aPS	58	0	0	1	1	0	1	1	0	0	2023-10-12
20	1	p20bPS	58	1	1	1	1	0	1	1	0	0	2023-10-31

## Sheet: relapsed patients
	sex(1 male,2 female)	DM	ALB	disease(1 AML,2 ALL)	department	remission	Chemo_pre	hsct	neutropenia	PTZ	CR	FQ	Swabs_antibiotics	Infection_before	Infection_after	colonization_before	colonization_after	age	NE	neutropenia_duration
RR1.OS	2	0	1	1	2	2	6	0	0	0	0	0	0	0	1	0	0	43	0.6	0
RR1.PS	2	0	1	1	2	2	6	0	0	0	0	0	0	0	1	0	0	43	0.6	0
RR1OS	2	0	1	1	2	2	6	0	0	0	0	0	0	0	1	0	0	43	0.6	0
RR2OS	1	1	1	1	2	2	1	0	0	1	1	1	1	1	1	1	1	58	0.59	0
RR3OS	1	0	1	1	2	2	1	0	0	0	1	0	1	0	0	0	0	28	0.67	0
RR4OS	1	1	1	1	2	2	6	0	0	1	1	0	1	1	0	1	1	54	1.6	0
RR5OS	1	0	0	2	2	2	5	1	1	1	1	0	1	0	0	0	0	17	0.21	4
RR6OS	1	0	0	1	2	2	5	0	0	1	1	0	0	1	1	0	1	51	0.96	0
RR7OS	1	0	1	1	2	2	1	0	0	0	1	0	1	0	0	0	0	28	0.67	0
RR8OS	2	0	1	2	2	2	3	1	0	0	1	1	1	0	0	0	0	32	0.56	0
RR9OS	1	0	1	1	2	2	10	1	0	1	1	0	1	0	1	1	0	38	2.53	0
RR10OS	2	0	0	1	2	2	1	0	1	0	0	0	0	0	0	0	0	41	0.21	1
RR11OS	1	0	1	1	2	2	1	0	1	1	1	1	1	0	1	0	1	34	0.12	6
RR12OS	1	0	1	1	2	2	3	0	1	0	1	0	0	0	0	0	0	32	0.06	4
RR13OS	1	0	0	1	1	2	1	0	1	1	1	1	0	0	0	0	0	27	0.16	6
RR14OS	1	0	1	2	1	2	4	0	0	1	1	1	1	0	0	0	0	27	0.85	0
RR15OS	1	0	1	1	2	2	6	1	0	1	1	1	1	0	0	1	0	36	1.68	0
RR16OS	2	0	1	1	2	2	6	1	1	1	1	1	1	0	0	1	0	40	0	8
RR17OS	1	0	0	1	2	2	5	0	1	0	1	0	0	0	0	0	0	55	0.11	8
RR18OS	1	0	0	1	2	2	5	1	0	0	0	0	0	0	0	0	0	21	2.6	0
RR19OS	2	0	1	2	2	2	5	1	0	0	0	0	0	0	1	0	1	45	1.31	0
RR20OS	2	0	0	1	2	2	6	1	1	0	0	0	0	0	0	0	0	47	0.45	2
RR21OS	1	0	1	1	2	2	1	0	1	0	0	0	0	0	1	0	0	20	0.03	4
RR1PS	2	0	1	1	2	2	6	0	0	0	0	0	0	0	1	0	0	43	0.6	0
RR2PS	1	1	1	1	2	2	1	0	0	1	1	1	1	1	1	1	1	58	0.59	0
RR3PS	1	0	1	1	2	2	1	0	0	0	1	0	1	0	0	0	0	28	0.67	0
RR4PS	1	1	1	1	2	2	6	0	0	1	1	0	1	1	0	1	1	54	1.6	0
RR5PS	1	0	0	2	2	2	5	1	1	1	1	0	1	0	0	0	0	17	0.21	4
RR6PS	1	0	0	1	2	2	5	0	0	1	1	0	0	1	1	0	1	51	0.96	0
RR7PS	1	0	1	1	2	2	1	0	0	0	1	0	1	0	0	0	0	28	0.67	0
RR8PS	2	0	1	2	2	2	3	1	0	0	1	1	1	0	0	0	0	32	0.56	0
RR9PS	1	0	1	1	2	2	10	1	0	1	1	0	1	0	1	1	0	38	2.53	0
RR10PS	2	0	0	1	2	2	1	0	1	0	0	0	0	0	0	0	0	41	0.21	1
RR11PS	1	0	1	1	2	2	1	0	1	1	1	1	1	0	1	0	1	34	0.12	6
RR12PS	1	0	1	1	2	2	3	0	1	0	1	0	0	0	0	0	0	32	0.06	4
RR13PS	1	0	0	1	1	2	1	0	1	1	1	1	0	0	0	0	0	27	0.16	6
RR14PS	1	0	1	2	1	2	4	0	0	1	1	1	1	0	0	0	0	27	0.85	0
RR15PS	1	0	1	1	2	2	6	1	0	1	1	1	1	0	0	1	0	36	1.68	0
RR16PS	2	0	1	1	2	2	6	1	1	1	1	1	1	0	0	1	0	40	0	8
RR17PS	1	0	0	1	2	2	5	0	1	0	1	0	0	0	0	0	0	55	0.11	8
RR18PS	1	0	0	1	2	2	5	1	0	0	0	0	0	0	0	0	0	21	2.6	0
RR19PS	2	0	1	2	2	2	5	1	0	0	0	0	0	0	1	0	1	45	1.31	0
RR20PS	2	0	0	1	2	2	6	1	1	0	0	0	0	0	0	0	0	47	0.45	2
RR21PS	1	0	1	1	2	2	1	0	1	0	0	0	0	0	1	0	0	20	0.03	4
CR10822O	1	1	1	1	2	2	2	0	1	1	1	1	1	1	1	1	1	58	0.05	10
CR10822P	1	1	1	1	2	2	2	0	1	1	1	1	1	1	1	1	1	58	0.05	10
CR10829O	1	1	1	1	2	2	3	0	1	1	1	1	1	1	1	1	1	58	0.07	10
CR10829P	1	1	1	1	2	2	3	0	1	1	1	1	1	1	1	1	1	58	0.07	10

## Sheet: Longitudinal_baseline
ID	Time_points	Chemotherapy_cycles	group	Age	Sex	Disease	Cormorbidities	Chemotherapy_regimen	Chemotherapy_response	Neutropenia_febrile	BSI	CRO_colonization	Antibiotic_treat
1	5	0	1	54	Male	AML	Yes	DA	NR	Yes	No	Yes	Yes
2	5	0	1	16	Male	AML	No	DAV	CR	Yes	No	No	Yes
3	4	0	1	26	Male	AML	No	DA	CR	Yes	No	No	No
4	4	0	1	54	Male	AML	No	DA	CR	No	No	No	No
5	3	0	1	25	Female	ALL	Yes	VDCLP+VEN	CR	No	No	No	No
6	5	0	1	22	Male	AML	No	DA	CR	Yes	No	No	Yes
7	5	0	1	54	Female	AML	No	Lipo-MIT-AraC	NR	Yes	No	Yes	Yes
9	5	0	1	43	Female	AML	No	DA	NR	Yes	No	No	Yes
10	4	0	1	48	Male	AML	No	DAV	CR	Yes	No	No	Yes
11	5	0	1	31	Male	ALL	No	VDCLP+VEN	CR	No	No	No	No
13	4	0	1	26	Female	AML	No	DA	NR	Yes	No	No	Yes
14	6	0	1	57	Female	AML	No	DAV	CR	Yes	No	No	Yes
15	4	0	1	18	Female	ALL	No	VDCLP+VEN	CR	Yes	No	No	Yes
16	4	0	1	37	Female	AML	No	DAV	CR	Yes	No	No	No
17	5	0	1	50	Female	AML	No	DA	NR	Yes	No	No	Yes
18	2	0	1	41	Male	ALL	No	VDCLP+VEN	CR	Yes	No	No	Yes
19	2	0	1	21	Male	ALL	No	VDCLP+VEN	CR	Yes	No	No	Yes
20	2	0	1	58	Male	AML	No	DA	CR	Yes	Yes	No	Yes
914146	1	6	0	43	Female	AML	No	DA	NR	No	No	No	No
914146	1	6	0	43	Female	AML	No	DA	NR	No	No	No	No
877809	1	2	0	58	Male	AML	Yes	VA	NR	No	Yes	Yes	Yes
877809	1	2	0	58	Male	AML	Yes	VA	NR	Yes	Yes	Yes	Yes
889294	1	3	0	28	Male	AML	No	VA	NR	No	No	No	Yes
853381	1	6	0	54	Male	AML	Yes	VA	CR	No	Yes	Yes	Yes
814683	1	5	0	17	Male	ALL	No	VDCLP	NR	Yes	No	No	Yes
863129	1	5	0	51	Male	AML	No	VA	NR	No	Yes	No	No
889294	1	3	0	28	Male	AML	No	VA	NR	No	No	No	Yes
904453	1	3	0	32	Female	ALL	No	VDCLP	NR	No	No	No	Yes
676718	1	10	0	38	Male	AML	No	DA	CR	No	No	Yes	Yes
914372	1	2	0	41	Female	AML	No	DA	CR	Yes	No	No	No
882459	1	2	0	34	Male	AML	No	VA	NR	Yes	No	No	Yes
914983	1	3	0	32	Male	AML	No	DA	CR	Yes	No	No	No
919967	1	2	0	27	Male	AML	No	DA	NR	Yes	No	No	No
869753	1	4	0	27	Male	ALL	No	VDCLP	NR	No	No	No	Yes
738320	1	6	0	36	Male	AML	No	DA	CR	No	No	Yes	Yes
796819	1	6	0	40	Female	AML	No	DA	CR	Yes	No	Yes	Yes
871450	1	5	0	55	Male	AML	No	DA	NR	Yes	No	No	No
826355	1	5	0	21	Male	AML	No	DA	CR	No	No	No	No
931517	1	5	0	45	Female	ALL	No	VDCLP	CR	No	No	No	No
931712	1	6	0	47	Female	AML	No	DA	NR	Yes	No	No	No
931146	1	2	0	20	Male	AML	No	VDCLP	NR	Yes	No	No	No

## Sheet: AL_1821cases
Hospital_stay	Duration_of_neutropenia	Age	Stage	Gender	CRO_colonization	Disease	Chemotherapy	allo_HSCT	Diabetes_mellitus	Hypoproteinemia	Primary_BSI	Pulmonary_source	Perianal_source	Prior_PTZ_use	Prior_carbapenems_use	Prior_fluoroquinolones_use	IET48h	Profound_neutropenia	Pneumonia	Perianal_infection	Shock	Death	TZPNS	FQNS	TZPR	CER	FQR	CRE	Pathogen
17	4	51	1	1	0	1	1	0	0	0	1	0	0	0	0	0	0	1	0	0	0	0	0	0	0	0	0	0	EC
17	3	51	1	1	0	1	1	0	0	0	1	0	0	0	1	0	0	1	0	0	0	0	0	0	0	0	0	0	EC
73	17	64	1	0	0	1	1	0	1	0	1	0	0	0	1	0	0	1	0	0	0	0	0	1	0	1	1	0	EC
26	14	59	1	1	0	1	1	0	0	0	0	0	0	0	0	0	0	1	0	0	0	0	0	1	0	1	1	0	EC
25	15	60	1	1	0	1	0	1	0	0	0	1	0	0	0	0	0	0	0	0	0	0	0	1	0	0	1	0	EC
107	20	51	2	0	0	1	1	0	0	0	1	0	0	0	0	0	0	1	0	0	0	0	0	1	0	0	1	0	EC
25	14	25	2	0	0	1	1	0	0	0	0	0	1	0	1	0	0	1	0	0	0	0	1	1	0	1	1	0	EC
28	11	25	0	0	0	1	1	0	0	0	0	0	1	0	1	0	0	1	0	0	0	0	0	1	0	0	1	0	EC
20	4	64	1	0	0	1	1	0	0	0	0	0	0	1	1	0	0	1	0	0	0	0	0	1	0	1	1	0	EC
29	11	55	0	0	0	1	1	0	0	0	1	0	0	0	0	0	0	1	0	0	0	0	0	1	0	0	1	0	EC
52	4	22	2	1	0	1	1	0	0	0	1	0	0	0	0	0	0	1	0	0	0	0	0	1	0	0	0	0	EC
39	30	10	1	1	0	0	1	0	0	0	0	0	1	0	1	0	0	1	1	0	0	0	0	1	0	0	1	0	EC
87	11	39	1	1	0	1	1	0	0	0	0	0	1	0	1	1	0	1	0	1	0	0	0	0	0	0	0	0	EC
28	12	9	1	1	0	0	1	0	0	0	1	0	0	0	1	0	1	1	0	0	0	0	1	1	1	1	1	1	EC
25	7	10	1	1	0	0	1	0	0	1	0	0	1	0	1	0	0	1	0	0	0	0	0	1	0	0	1	0	EC
7	0	49	1	1	0	0	0	1	1	1	1	0	0	0	0	0	0	0	0	0	0	0	0	1	0	0	1	0	EC
42	6	54	0	0	0	1	0	1	0	0	1	0	0	0	1	1	0	0	0	0	0	0	1	1	1	1	1	0	EC
42	42	42	1	1	0	1	1	0	0	1	0	1	0	0	1	0	0	1	0	0	0	1	0	1	0	0	1	0	EC
42	14	62	1	1	0	1	1	0	1	1	1	0	0	0	0	1	0	1	0	0	0	0	0	1	0	0	1	0	EC
20	5	8	1	1	0	0	1	0	0	0	1	0	0	0	0	0	0	1	0	0	0	0	0	1	0	1	1	0	EC
25	8	47	1	1	0	1	1	0	1	0	0	0	0	0	0	0	0	1	0	0	0	0	0	1	0	0	1	0	EC
36	6	52	1	0	0	0	1	0	0	0	0	0	1	0	0	0	0	1	0	0	0	0	0	1	0	0	1	0	EC
38	12	9	1	1	0	0	1	0	0	0	0	0	0	0	0	0	0	1	1	0	0	0	0	1	0	0	0	0	EC
49	11	19	1	1	0	0	1	0	0	0	0	0	1	0	0	0	0	1	0	0	0	0	0	1	0	0	1	0	EC
127	47	19	1	1	0	0	1	0	0	0	0	0	0	0	1	0	0	1	0	0	0	0	0	1	0	0	1	0	EC
34	31	37	0	0	0	1	0	1	0	0	0	0	0	0	0	0	0	0	0	1	0	0	0	0	0	1	0	0	EC
27	20	32	1	0	0	1	1	0	0	0	0	0	1	0	0	0	0	1	0	0	0	0	0	0	0	0	0	0	EC
23	10	12	1	0	0	0	1	0	0	0	0	0	1	0	0	0	0	1	0	0	0	0	0	1	0	1	1	0	EC
43	11	6	1	1	0	0	1	0	0	0	1	0	0	0	1	0	0	1	0	0	0	0	0	1	0	0	1	0	EC
73	0	19	1	1	0	0	1	0	0	1	1	0	0	0	1	0	0	0	1	0	0	0	0	1	0	0	1	0	EC
26	5	17	2	1	0	0	1	0	0	0	0	0	0	0	0	0	0	1	0	0	0	0	0	1	0	0	1	0	EC
33	14	53	0	1	0	1	1	0	0	0	1	0	0	0	0	0	0	1	0	0	0	0	1	1	0	1	1	0	EC
29	16	55	0	0	0	1	0	0	0	0	0	0	0	0	0	0	0	1	0	0	0	0	0	1	0	0	0	0	EC
26	6	26	0	1	0	1	1	0	0	0	1	0	0	0	0	0	0	1	0	0	0	0	0	0	0	0	0	0	EC
40	16	41	1	0	0	1	1	0	0	0	1	0	0	0	0	0	0	1	0	0	0	0	0	1	0	1	1	0	EC
30	17	43	0	0	0	1	0	1	0	0	0	0	0	0	0	1	0	1	0	0	0	0	0	1	0	0	1	0	EC
28	25	31	1	1	0	0	1	0	0	1	1	0	0	0	1	0	0	1	1	0	0	1	0	0	0	0	0	0	EC
49	35	9	1	0	0	0	1	0	0	0	1	0	0	0	0	0	0	1	0	0	0	0	0	1	0	0	0	0	EC
23	3	9	2	1	0	0	1	0	0	0	1	0	0	0	1	0	0	1	0	0	0	0	0	0	0	0	0	0	EC
30	11	6	0	0	0	1	1	0	0	0	1	0	0	0	1	0	0	1	0	0	0	0	0	1	0	0	1	0	EC
50	16	6	0	0	0	1	1	0	0	0	1	0	0	0	1	0	0	1	0	0	0	0	1	1	0	1	1	0	EC
26	30	44	1	1	0	1	0	0	0	1	0	0	1	0	1	0	0	0	0	0	1	1	0	1	0	1	1	0	EC
28	23	45	1	1	0	1	1	0	0	0	0	0	1	0	0	0	0	1	0	0	1	0	0	1	0	0	1	0	EC
33	12	7	1	0	0	0	1	0	0	0	0	0	1	0	0	0	0	1	0	0	1	0	0	0	0	0	0	0	EC
40	22	41	0	0	0	1	1	0	0	0	1	0	0	0	1	0	0	1	0	0	1	0	0	1	0	0	1	0	EC
25	29	40	1	1	0	0	1	0	0	0	0	0	0	0	0	0	0	1	0	0	0	1	0	1	0	0	1	0	EC
19	12	12	0	0	0	0	1	0	0	0	1	0	0	0	1	0	0	1	0	0	0	0	0	1	0	0	1	0	EC
20	7	7	0	0	0	1	1	0	0	0	1	0	0	0	1	0	0	1	0	0	0	0	0	0	0	0	0	0	EC
24	12	25	0	1	0	1	0	1	0	0	0	0	1	0	1	1	0	0	0	0	0	0	0	1	0	0	1	0	EC
25	5	14	0	1	0	1	1	0	0	0	1	0	0	0	1	0	0	1	0	0	0	0	0	1	0	0	1	0	EC
27	14	27	0	1	0	1	1	0	0	0	1	0	0	0	0	0	0	1	0	0	0	0	0	0	0	0	0	0	EC
105	26	38	2	1	0	1	1	0	0	0	1	0	0	0	1	1	0	1	0	0	0	0	0	1	0	1	1	0	EC
21	12	51	2	0	0	1	1	0	0	0	1	0	0	0	1	0	0	1	0	0	0	0	0	1	0	0	1	0	EC
69	11	46	0	1	0	1	1	0	0	0	1	0	0	0	1	1	0	1	0	0	0	0	0	0	0	0	0	0	EC
11	5	48	0	1	0	1	1	0	0	0	1	0	0	0	0	0	0	1	0	0	0	0	0	0	0	0	0	0	EC
57	29	29	0	0	0	1	1	0	0	0	0	0	1	0	1	0	0	1	0	0	0	0	0	1	0	1	1	0	EC
30	15	47	1	0	0	1	1	0	0	0	1	0	0	0	0	0	0	0	0	0	0	0	0	0	0	0	0	0	EC
21	14	48	1	0	0	1	0	0	0	0	0	0	1	0	0	0	0	1	1	0	0	0	1	1	0	1	1	0	EC
55	2	31	2	0	0	1	1	0	0	0	1	0	0	0	1	0	0	1	0	0	1	1	0	0	0	0	0	0	EC
91	31	44	0	1	0	0	1	0	0	0	0	1	0	0	1	0	0	1	0	0	0	0	0	1	0	1	1	0	EC
39	13	44	0	1	0	0	0	1	0	0	1	0	0	1	1	0	0	0	0	1	0	0	1	1	1	1	1	0	EC
20	32	51	1	0	0	1	1	0	0	0	1	0	0	0	1	1	0	1	0	0	0	0	1	1	1	1	1	0	EC
108	14	52	1	0	0	1	1	0	0	0	1	0	0	0	1	0	0	0	0	0	0	0	0	0	0	0	0	0	EC
34	22	52	1	0	0	1	1	0	0	0	1	0	0	0	1	0	0	1	0	0	1	1	0	1	0	0	0	0	EC
78	5	15	2	1	0	0	1	0	0	0	1	0	0	1	0	0	0	1	0	0	0	0	0	0	0	0	0	0	EC
90	14	59	2	0	0	1	1	0	0	0	0	0	1	0	0	0	0	1	1	0	0	0	0	0	0	0	0	0	EC
27	23	15	2	1	0	0	1	0	0	0	1	0	0	0	1	0	0	1	1	0	0	0	0	1	0	0	1	0	EC
43	74	15	1	1	0	1	1	0	0	1	0	0	0	0	1	0	0	1	0	0	0	0	0	1	0	0	1	0	EC
21	16	41	0	1	0	1	1	0	0	0	1	0	0	0	0	0	0	1	1	0	0	0	0	1	0	0	1	0	EC
36	7	37	0	0	0	1	1	0	0	0	0	0	1	0	0	0	0	0	0	0	0	0	0	0	0	0	0	0	EC
37	3	54	2	0	0	0	1	0	0	0	0	0	0	0	0	0	0	1	0	0	1	0	0	0	0	0	0	0	EC
40	5	36	0	0	0	0	1	0	0	0	0	0	0	0	0	0	0	1	0	0	0	0	0	0	0	0	0	0	EC
23	3	36	0	0	0	0	1	0	0	0	1	0	0	0	1	0	0	1	0	1	0	0	0	0	0	0	0	0	EC
19	9	53	0	0	0	1	1	0	1	0	1	0	0	0	1	0	0	0	0	0	0	0	0	1	0	0	1	0	EC
43	19	58	2	0	0	0	1	0	1	0	0	0	0	0	0	0	0	1	0	0	0	0	0	0	0	0	0	0	EC
26	6	54	2	0	0	1	1	0	0	0	0	1	0	0	1	1	0	1	0	0	0	1	1	1	1	1	1	1	EC
23	31	2	2	0	0	0	1	0	0	0	1	0	0	0	0	0	0	0	0	0	0	0	0	0	0	0	0	0	EC
20	25	53	2	1	0	1	1	0	0	0	0	0	0	0	0	0	0	1	0	0	0	0	0	1	0	1	1	0	EC
28	8	53	0	0	0	1	1	0	0	0	1	0	0	0	0	0	0	1	0	0	0	0	0	0	0	0	0	0	EC
26	4	54	2	0	0	1	1	0	1	0	1	0	0	0	1	0	0	0	0	0	0	0	0	1	0	0	1	0	EC
16	15	48	0	1	0	1	1	0	0	0	0	1	0	0	0	0	0	1	0	0	0	0	0	1	0	0	1	0	EC
172	12	14	2	0	0	1	1	0	0	0	1	0	0	0	1	0	0	0	0	0	0	0	0	1	0	0	1	0	EC
24	30	57	1	1	0	1	1	0	0	1	0	0	0	0	0	0	0	1	0	0	0	0	0	1	0	0	1	0	EC
20	40	28	2	0	0	1	1	0	0	1	0	0	0	0	1	0	0	1	0	0	0	0	0	1	0	1	1	0	EC
21	11	21	0	1	0	0	0	1	0	0	0	0	1	0	0	1	0	1	0	0	0	0	1	1	0	1	1	0	EC
68	5	53	0	0	0	1	1	0	0	0	1	0	0	0	1	0	0	1	0	0	0	0	0	1	0	1	1	0	EC
35	5	16	2	1	0	0	1	0	0	1	1	0	0	0	0	0	0	0	1	0	0	0	0	0	0	0	0	0	EC
83	0	40	2	0	0	1	1	0	1	0	1	0	0	0	1	0	1	0	0	0	0	0	1	1	1	1	1	1	EC
63	20	52	0	1	0	1	1	0	1	0	1	0	0	1	0	0	0	1	0	0	0	0	0	1	0	0	1	0	EC
50	21	58	2	0	0	1	1	0	0	0	0	0	0	1	1	0	0	1	1	0	0	0	1	1	0	1	1	0	EC
49	55	68	2	1	0	1	1	0	0	0	0	1	0	1	0	0	0	0	0	0	0	0	0	1	0	1	1	0	EC
28	32	5	1	0	0	0	1	0	0	0	1	0	0	0	0	0	0	1	0	1	0	0	0	0	0	0	0	0	EC
23	5	21	0	0	0	0	1	0	0	0	0	0	1	0	0	0	0	0	0	0	0	0	0	1	0	1	1	0	EC
33	3	41	0	0	0	1	1	0	0	0	1	0	0	0	1	0	0	1	0	0	0	0	0	0	0	1	0	0	EC
35	19	53	2	1	0	1	1	0	0	1	1	0	0	0	0	0	0	1	1	0	0	1	0	1	0	0	1	0	EC
20	14	36	0	0	0	1	1	0	0	0	1	0	0	0	0	0	0	1	0	0	0	0	0	1	0	1	1	0	EC
77	11	59	0	1	0	1	1	0	0	0	0	0	0	0	0	0	0	1	0	0	0	0	0	0	0	0	0	0	EC
22	9	10	0	0	0	0	1	0	0	0	1	0	0	0	0	0	0	1	0	0	0	0	0	1	0	0	0	0	EC
28	19	40	1	1	0	0	1	0	1	1	1	0	0	0	0	0	0	1	0	0	0	0	0	0	0	1	0	0	EC
21	8	25	0	1	0	0	1	0	0	0	1	0	0	1	0	0	0	1	1	0	0	0	0	1	0	0	1	0	EC
79	16	54	2	1	0	1	1	0	1	0	1	0	0	1	0	0	0	1	0	0	0	0	1	1	1	1	1	0	EC
23	5	51	0	0	0	0	1	0	0	0	1	0	0	0	0	0	0	1	0	0	0	0	0	0	0	0	0	0	EC
26	7	21	0	0	0	1	1	0	0	0	1	0	0	0	1	1	0	1	0	0	0	0	0	1	0	0	1	0	EC
25	59	28	1	0	0	1	0	0	0	0	1	0	0	0	1	0	0	1	0	0	0	0	0	1	0	0	0	0	EC
16	10	23	0	1	0	1	1	0	0	0	0	0	1	0	1	0	0	1	0	0	0	0	0	1	0	0	1	0	EC
21	16	40	0	0	0	1	1	0	0	0	1	0	0	0	1	1	0	1	0	0	0	1	0	1	0	0	1	0	EC
24	5	46	2	0	0	0	1	0	0	1	0	0	1	0	0	0	1	1	0	0	0	0	1	1	1	1	1	1	EC
30	33	17	2	0	0	0	1	0	0	0	0	0	1	0	0	0	0	1	0	0	1	1	1	1	1	1	1	1	EC
28	8	9	2	1	0	1	1	0	0	0	0	0	1	0	1	0	0	1	0	0	0	0	0	1	0	0	1	0	EC
30	7	22	0	1	0	1	1	0	0	0	0	0	0	1	1	1	0	1	0	0	0	0	0	0	0	0	0	0	EC
20	6	63	1	1	0	0	1	0	1	0	1	0	0	0	0	0	0	1	0	0	1	0	0	1	0	0	1	0	EC
21	10	36	0	0	0	1	1	0	0	0	1	0	0	0	0	0	0	1	0	0	0	0	0	0	0	0	0	0	EC
78	8	14	2	0	0	0	1	0	0	0	0	0	0	0	1	0	0	1	0	0	0	0	0	0	0	0	0	0	EC
126	4	59	0	1	1	0	1	0	1	0	1	0	0	0	0	0	0	1	0	0	0	0	0	1	0	0	0	0	EC
44	17	28	2	0	1	0	1	0	0	0	1	0	0	0	1	0	0	1	0	0	0	0	1	1	1	1	1	0	EC
27	17	3	2	0	0	0	1	0	0	0	0	0	0	0	1	0	0	1	0	0	0	0	0	0	0	0	0	0	EC
34	16	46	0	1	0	0	0	1	0	1	0	0	0	0	0	0	0	0	1	0	0	0	1	0	1	1	0	1	EC
70	7	59	2	1	0	0	1	0	0	0	0	0	1	0	1	0	0	1	0	0	0	0	1	1	1	1	1	1	EC
24	7	59	2	1	0	0	1	0	0	0	1	0	0	0	1	0	0	1	1	0	0	0	0	1	0	1	1	0	EC
53	27	34	1	0	0	1	1	0	0	0	0	0	1	0	0	0	0	1	0	0	0	0	0	1	0	0	1	0	EC
56	14	38	2	0	0	0	1	0	0	0	1	0	0	0	1	0	1	1	1	0	0	0	1	1	1	1	1	0	EC
20	3	34	0	0	0	1	1	0	0	0	0	0	1	0	1	1	0	1	0	0	0	0	0	0	0	0	0	0	EC
30	48	59	2	0	0	1	1	0	0	1	0	0	0	0	1	1	0	1	1	0	0	0	1	1	0	1	1	0	EC
23	22	8	2	1	0	0	1	0	1	1	0	0	0	0	1	0	0	1	1	0	0	0	0	1	0	0	1	0	EC
23	20	36	2	0	0	1	1	0	0	1	0	1	0	0	1	0	0	1	0	0	0	1	1	1	1	1	1	0	EC
23	23	49	2	1	0	1	1	0	0	0	1	0	0	0	1	0	0	0	0	0	0	0	0	1	0	1	1	0	EC
43	13	13	0	0	0	1	1	0	0	0	0	0	1	0	0	0	0	1	0	0	0	0	0	1	0	1	1	0	EC
27	13	38	2	0	0	1	1	0	0	0	0	1	0	0	0	0	1	0	0	0	0	0	1	1	1	1	1	0	EC
20	8	39	2	0	0	1	1	0	0	0	1	0	0	0	0	0	0	1	0	0	0	0	1	1	0	0	1	0	EC
36	11	40	0	1	1	1	1	0	0	1	0	0	1	0	1	0	0	1	0	0	0	0	0	0	0	0	0	0	EC
31	9	5	2	0	0	1	1	0	0	0	0	0	1	0	0	0	0	1	1	0	0	0	0	0	0	0	0	0	EC
46	13	6	0	0	0	1	1	0	0	0	1	0	0	0	1	0	0	1	0	0	0	0	0	0	0	0	0	0	EC
46	11	31	0	0	0	1	1	0	0	0	0	0	1	0	0	0	0	0	0	0	0	0	0	0	0	0	0	0	EC
49	25	43	2	0	0	0	1	0	1	0	0	0	1	0	1	1	0	0	0	0	0	0	0	1	0	0	1	0	EC
24	0	43	2	0	0	0	1	0	1	1	0	0	1	0	1	1	0	0	0	0	0	0	0	1	0	0	1	0	EC
25	10	43	2	0	0	0	1	0	1	1	0	0	1	0	1	1	0	1	0	1	0	0	0	1	0	0	1	0	EC
20	47	38	2	0	0	1	1	0	0	1	0	0	1	0	1	1	0	1	1	0	0	0	0	1	0	1	1	0	EC
26	8	10	2	1	1	0	1	0	0	0	1	0	0	0	1	0	0	1	0	0	0	0	0	0	0	0	0	0	EC
28	6	34	2	0	0	1	1	0	0	0	1	0	0	0	0	0	0	1	1	0	0	0	0	1	0	1	1	0	EC
34	15	65	1	1	0	0	0	1	1	0	1	0	0	0	0	0	0	1	0	0	0	0	0	1	0	0	1	0	EC
23	0	65	1	1	0	0	0	0	1	0	1	0	0	0	1	0	0	0	0	0	0	0	0	1	0	0	1	0	EC
25	10	11	2	1	0	1	1	0	0	0	0	0	1	0	1	0	0	1	0	0	0	0	0	0	0	0	0	0	EC
20	21	24	1	1	0	1	0	1	0	1	0	0	0	0	1	0	0	1	0	0	1	1	0	0	0	0	0	0	EC
73	4	64	0	0	0	1	1	0	0	1	0	0	0	0	1	0	0	1	0	0	1	1	0	0	0	0	0	0	EC
28	13	39	0	0	0	0	1	0	0	0	0	0	0	0	0	0	0	1	1	0	0	0	0	1	0	0	1	0	EC
38	7	8	2	0	0	0	1	0	0	0	0	0	0	0	0	0	0	1	0	0	0	0	1	1	1	0	1	0	EC
23	13	40	0	1	0	0	1	0	1	1	0	0	1	0	1	0	0	0	0	0	0	0	0	1	0	0	1	0	EC
25	0	55	2	1	0	0	1	0	0	0	1	0	0	1	1	0	0	0	0	0	0	0	0	0	0	0	0	0	EC
63	5	55	2	1	0	0	1	0	0	0	1	0	0	0	1	0	0	1	0	0	0	0	0	0	0	0	0	0	EC
21	10	55	0	0	0	0	1	0	0	0	1	0	0	0	1	0	0	1	0	0	0	0	0	0	0	0	0	0	EC
32	12	55	0	0	0	0	1	0	0	0	1	0	0	0	1	0	0	1	0	0	0	0	0	0	0	0	0	0	EC
24	5	36	2	0	0	0	1	0	0	0	1	0	0	0	1	0	0	0	0	0	0	0	0	1	0	0	1	0	EC
21	9	36	0	1	0	0	1	0	0	0	1	0	0	0	0	1	0	1	0	0	0	0	0	1	0	0	1	0	EC
23	12	36	0	1	0	0	1	0	0	0	0	0	1	0	1	0	0	0	0	0	1	0	0	0	0	0	0	0	EC
41	7	3	2	1	0	0	1	0	0	0	1	0	0	0	0	0	0	1	0	0	0	0	0	1	0	0	0	0	EC
21	7	16	2	1	0	0	1	0	0	0	0	0	0	0	0	0	0	1	1	0	0	1	0	0	0	0	0	0	EC
49	7	40	2	1	0	1	1	0	0	0	1	0	0	0	0	0	0	1	0	0	0	0	0	0	0	0	0	0	EC
23	9	41	0	1	0	1	1	0	0	0	0	0	0	0	1	0	0	1	0	0	0	0	0	0	0	0	0	0	EC
16	5	55	0	1	0	1	1	0	1	0	1	0	0	0	0	0	0	1	0	0	0	0	0	0	0	0	0	0	EC
30	8	15	1	1	0	0	1	0	0	0	1	0	0	0	0	0	0	1	0	0	0	0	0	1	0	1	0	0	EC
31	5	17	0	1	0	0	1	0	0	0	1	0	0	0	0	0	0	0	0	0	0	0	0	1	0	1	1	0	EC
23	25	30	2	0	0	0	1	0	0	1	0	0	0	0	0	0	0	1	0	0	0	0	0	1	0	1	1	0	EC
30	12	59	2	1	0	0	1	0	1	0	0	0	1	0	1	0	0	1	1	0	0	0	0	1	0	0	1	0	EC
32	7	48	0	1	0	1	1	0	0	0	1	0	0	0	0	0	0	1	0	0	0	0	0	1	0	0	1	0	EC
30	7	13	0	1	0	0	1	0	0	0	0	1	0	0	0	0	0	0	0	0	0	0	0	0	0	0	0	0	EC
94	6	41	0	0	0	0	1	0	1	0	1	0	0	0	0	0	0	0	0	0	0	0	0	1	0	1	1	0	EC
25	7	37	2	0	0	1	1	0	0	0	0	0	0	0	0	0	0	1	0	0	0	0	0	1	0	0	1	0	EC
99	12	34	0	1	0	1	1	0	0	0	1	0	0	0	1	0	0	1	0	0	0	0	0	0	0	0	0	0	EC
42	12	15	0	1	0	0	1	0	1	0	1	0	0	0	0	0	0	1	0	0	0	0	0	0	0	0	0	0	EC
44	14	17	0	1	0	0	1	0	1	0	1	0	0	0	0	0	0	1	0	0	0	0	0	1	0	1	1	0	EC
22	21	31	0	0	0	0	1	0	1	1	0	0	1	0	1	0	0	0	0	0	0	0	0	0	0	0	0	0	EC
31	0	21	1	0	0	0	0	0	0	0	0	0	0	0	0	0	0	0	0	0	0	0	0	1	0	1	1	0	EC
41	0	21	1	0	0	0	0	0	0	0	0	0	0	0	1	0	0	0	0	0	0	0	0	1	0	1	0	0	EC
120	0	21	1	0	0	0	0	0	0	0	0	0	0	0	1	0	0	0	0	0	0	0	0	1	0	1	1	0	EC
91	6	21	1	0	0	0	0	0	0	0	0	0	0	0	1	0	0	0	0	0	0	0	0	1	0	0	0	0	EC
28	11	29	2	1	0	0	1	0	0	0	1	0	0	0	0	0	0	0	0	0	0	0	0	0	0	0	0	0	EC
70	46	64	2	0	0	1	1	0	1	0	1	0	0	0	0	0	0	1	0	0	0	0	0	0	0	0	0	0	EC
21	10	43	0	1	0	0	1	0	0	0	1	0	0	0	1	0	0	0	0	0	0	0	0	1	0	0	1	0	EC
24	6	45	0	1	0	1	1	0	0	0	1	0	0	0	0	0	0	1	0	0	0	0	0	1	0	0	1	0	EC
24	7	23	2	1	0	1	1	0	0	0	0	0	0	0	0	0	0	1	0	0	0	0	0	1	0	1	1	0	EC
30	31	47	2	0	0	0	1	0	0	1	1	0	0	0	0	0	0	1	1	0	0	0	0	1	0	0	1	0	EC
12	16	15	2	0	0	0	1	0	0	0	1	0	0	0	1	0	0	0	1	0	0	0	0	0	0	0	0	0	EC
15	12	16	0	1	0	0	1	0	0	0	1	0	0	0	0	0	0	1	1	0	0	0	0	0	0	0	0	0	EC
27	32	44	2	0	0	1	1	0	0	0	0	0	1	0	1	0	0	0	1	0	0	0	0	1	0	0	1	0	EC
34	13	40	2	1	0	1	1	0	0	0	0	0	0	0	0	1	0	1	0	0	0	0	0	1	0	1	1	0	EC
26	8	31	0	0	0	1	1	0	0	0	1	0	0	0	1	1	0	1	0	0	0	0	0	1	0	0	0	0	EC
40	17	45	2	0	0	1	1	0	0	0	1	0	0	0	0	0	0	0	0	0	0	1	0	1	0	1	1	0	EC
24	7	45	2	0	0	1	1	0	0	0	1	0	0	0	1	0	0	0	0	0	1	1	0	1	0	1	1	0	EC
32	1	39	0	1	0	1	1	0	0	1	0	0	1	0	1	0	0	1	0	0	0	1	0	1	0	0	1	0	EC
33	28	44	1	0	0	0	1	0	0	0	1	0	0	0	0	0	0	1	0	0	0	0	0	1	0	0	1	0	EC
28	9	22	2	1	0	0	1	0	0	0	0	0	1	0	0	0	0	1	0	0	0	0	0	1	0	1	1	0	EC
14	5	39	2	0	0	1	1	0	0	0	0	0	0	0	0	0	1	1	0	0	1	1	0	1	0	1	1	0	EC
42	8	50	0	1	0	1	1	0	0	0	0	0	1	0	1	1	0	1	0	0	0	0	0	0	0	0	0	0	EC
28	47	35	1	0	0	1	1	0	0	0	1	0	0	0	0	0	0	0	0	0	0	0	0	0	0	0	0	0	EC
22	20	46	1	0	0	1	1	0	0	0	1	0	0	0	0	0	0	1	0	0	0	0	0	1	0	0	1	0	EC
98	13	46	2	0	1	1	1	0	0	0	0	0	1	0	1	1	0	1	0	0	0	0	0	1	0	0	1	0	EC
34	14	54	2	0	0	1	1	0	0	0	1	0	0	0	0	1	0	1	0	0	0	0	0	1	0	0	1	0	EC
66	15	29	1	0	0	1	1	0	0	0	1	0	0	0	0	0	0	0	0	0	0	0	0	1	0	1	0	0	EC
48	7	6	0	1	1	1	1	0	0	0	0	0	1	0	0	1	0	1	0	0	0	0	0	0	0	0	0	0	EC
39	8	59	2	1	0	1	1	0	0	0	0	0	1	0	1	0	0	1	0	0	0	0	1	1	1	1	1	1	EC
22	14	18	0	0	0	0	1	0	0	1	1	0	0	0	0	0	0	1	0	0	0	0	0	1	0	0	1	0	EC
27	4	27	0	1	0	0	1	0	0	0	1	0	0	0	0	0	0	1	0	0	0	0	0	0	0	0	0	0	EC
92	12	54	2	1	0	1	1	0	0	1	1	0	0	0	1	1	0	0	1	0	0	1	0	1	0	1	1	0	EC
18	28	38	0	0	0	1	0	1	0	0	0	0	0	0	0	0	0	1	0	0	0	0	0	1	0	0	1	0	EC
23	10	38	1	0	0	1	1	0	0	0	0	0	0	0	0	0	0	1	1	0	0	0	0	1	0	0	1	0	EC
7	16	54	2	1	0	1	1	0	0	1	1	0	0	0	0	0	0	1	0	0	0	0	1	1	1	1	1	0	EC
32	5	10	2	1	0	0	1	0	0	0	1	0	0	0	1	0	0	1	0	0	0	0	0	0	0	0	0	0	EC
33	7	47	0	1	0	1	1	0	1	0	0	0	1	0	1	0	0	1	0	0	0	0	1	1	1	1	1	1	EC
65	11	18	1	0	0	1	1	0	0	0	1	0	0	0	0	0	0	1	0	0	0	0	0	1	0	0	1	0	EC
24	59	13	2	0	0	1	1	0	0	1	0	0	1	0	1	0	1	1	1	0	0	0	1	1	0	1	1	0	EC
9	7	44	0	0	0	0	1	0	0	0	1	0	0	0	0	0	0	0	0	0	0	0	0	1	0	0	1	0	EC
29	18	7	1	1	0	1	0	1	0	0	1	0	0	0	1	1	0	1	0	0	1	0	0	1	0	0	1	0	EC
49	6	35	0	0	0	1	1	0	0	0	1	0	0	1	0	0	0	1	0	0	0	0	0	0	0	0	0	0	EC
100	15	35	2	1	0	1	1	0	0	0	1	0	0	0	0	0	0	1	0	0	0	0	0	1	0	0	0	0	EC
42	13	36	0	1	0	1	1	0	0	0	1	0	0	0	1	0	0	1	0	0	0	0	0	1	0	0	0	0	EC
23	18	2	0	0	0	0	1	0	0	0	0	0	1	0	1	0	0	1	0	0	0	0	1	1	0	1	1	0	EC
26	30	31	1	1	0	0	1	0	1	0	0	0	1	0	0	0	0	0	0	0	0	0	0	1	0	0	0	0	EC
28	6	30	0	1	0	1	1	0	0	0	0	0	0	0	1	0	0	0	0	0	0	0	0	0	0	0	0	0	EC
97	11	51	0	0	0	0	1	0	0	0	1	0	0	0	0	0	0	1	1	0	0	0	0	0	0	0	0	0	EC
25	18	45	2	1	0	1	1	0	0	0	0	0	0	0	0	0	0	1	0	0	0	0	0	1	0	1	1	0	EC
24	4	52	0	0	0	0	1	0	1	0	1	0	0	0	0	0	0	1	0	0	0	0	0	1	0	0	1	0	EC
45	6	35	0	0	0	1	1	0	0	0	1	0	0	0	1	0	0	1	0	0	0	0	0	1	0	0	0	0	EC
29	24	33	2	1	0	1	1	0	0	0	1	0	0	0	1	0	0	1	0	0	0	0	0	1	0	1	1	0	EC
45	10	51	1	1	0	1	1	0	0	0	0	0	1	0	0	0	0	1	0	0	0	0	0	1	0	0	1	0	EC
22	8	37	0	1	0	1	1	0	0	0	0	0	1	0	1	1	0	1	0	0	0	0	0	0	0	0	0	0	EC
69	8	10	2	0	0	1	1	0	0	0	1	0	0	0	1	0	1	0	0	0	0	0	0	0	0	0	0	0	EC
40	9	11	0	0	0	1	1	0	0	0	1	0	0	0	1	0	0	1	0	0	0	0	1	1	1	1	0	1	EC
37	14	60	0	0	0	1	1	0	0	0	0	0	0	0	1	0	0	1	0	0	0	0	0	1	0	0	1	0	EC
34	9	31	0	1	0	0	1	0	0	0	1	0	0	0	0	0	0	1	0	0	0	0	0	1	0	1	1	0	EC
21	19	59	0	0	0	1	1	0	0	0	1	0	0	0	0	0	0	1	0	1	0	0	0	0	0	0	0	0	EC
33	10	18	0	1	0	0	0	1	0	0	0	0	1	0	0	0	0	0	0	0	0	0	0	1	0	1	1	0	EC
34	56	26	2	0	0	1	1	0	0	0	0	0	1	0	0	0	0	1	0	0	0	0	0	1	0	0	1	0	EC
82	12	10	0	0	0	1	0	1	0	0	0	0	0	0	1	0	0	1	0	0	0	0	0	1	0	0	0	0	EC
27	24	48	1	0	0	1	1	0	0	0	1	0	0	1	0	0	0	1	0	0	0	0	0	1	0	1	1	0	EC
27	12	36	2	1	0	1	1	0	1	0	0	1	0	0	1	0	0	1	0	0	0	0	1	1	1	1	1	0	EC
28	10	53	2	0	0	0	1	0	0	0	0	0	1	0	0	0	0	0	0	0	0	0	0	1	0	0	1	0	EC
21	18	17	0	1	0	1	1	0	0	0	1	0	0	0	0	0	0	1	0	0	0	0	0	1	0	0	1	0	EC
28	6	36	0	0	0	1	1	0	0	0	1	0	0	0	0	0	0	1	0	0	0	0	0	1	0	0	0	0	EC
28	4	29	0	0	0	1	1	0	0	0	0	0	1	0	1	0	0	1	0	0	0	0	0	1	0	0	0	0	EC
34	0	25	0	0	0	1	1	0	0	0	1	0	0	0	1	1	0	0	0	1	0	0	0	1	0	0	1	0	EC
28	0	14	0	0	0	1	1	0	0	0	1	0	0	1	0	0	0	0	0	0	0	0	0	1	0	0	1	0	EC
20	0	33	0	1	0	1	1	0	0	0	1	0	0	0	0	0	0	0	0	0	0	0	0	1	0	0	1	0	EC
36	6	29	0	1	0	1	1	0	0	0	1	0	0	0	1	0	0	1	0	0	0	0	0	0	0	0	0	0	EC
28	13	47	0	0	0	1	1	0	0	0	1	0	0	0	0	0	0	1	0	0	0	0	0	1	0	0	1	0	EC
42	12	3	2	1	0	1	1	0	0	0	0	0	1	0	1	0	0	1	0	0	0	0	0	1	0	0	0	0	EC
50	10	34	0	0	0	1	1	0	0	0	1	0	0	0	1	0	0	1	0	0	0	0	0	1	0	0	0	0	EC
47	6	59	0	0	0	1	1	0	0	0	1	0	0	0	1	0	0	1	0	0	0	0	0	0	0	0	0	0	EC
23	7	47	2	1	0	1	1	0	1	0	0	0	1	0	0	0	0	0	1	0	0	0	0	1	0	0	1	0	EC
27	36	16	0	1	0	0	1	0	0	1	1	0	0	0	1	0	0	1	0	0	0	0	0	1	0	1	1	0	EC
52	10	5	2	1	0	1	1	0	0	0	0	0	0	0	1	0	0	1	0	0	0	0	0	1	0	0	1	0	EC
19	13	2	2	1	0	0	1	0	0	0	1	0	0	0	0	0	0	1	0	0	0	0	0	1	0	1	1	0	EC
28	4	63	2	0	0	1	1	0	0	0	1	0	0	1	0	0	0	1	0	0	0	0	0	1	0	0	0	0	EC
29	0	10	2	1	0	0	1	0	0	0	1	0	0	0	0	0	0	0	0	0	0	0	0	1	0	0	1	0	EC
38	9	49	0	0	0	1	1	0	0	0	1	0	0	0	1	1	0	1	0	0	0	0	0	1	0	0	1	0	EC
29	45	4	0	1	1	0	1	0	0	0	1	0	0	0	0	0	1	0	0	0	0	0	0	1	0	0	1	0	EC
42	12	56	2	1	0	1	1	0	0	0	0	1	0	0	0	0	0	1	0	0	0	0	0	1	0	0	1	0	EC
28	9	21	2	0	0	0	1	0	0	0	1	0	0	0	0	0	0	1	0	0	0	0	0	1	0	0	0	0	EC
89	29	65	1	0	0	1	1	0	1	0	1	0	0	0	0	0	0	1	0	0	0	0	0	1	0	0	0	0	EC
30	20	46	1	1	0	1	1	0	0	0	1	0	0	0	0	0	0	1	0	0	0	0	0	1	0	0	0	0	EC
52	17	53	2	0	1	1	1	0	0	0	1	0	0	0	0	0	0	1	0	0	0	0	0	1	0	0	1	0	EC
30	6	46	2	1	0	1	1	0	0	0	1	0	0	0	0	0	0	1	0	0	0	0	0	1	0	0	1	0	EC
43	18	18	0	1	0	1	0	1	0	0	0	0	0	0	1	0	0	1	0	0	0	0	0	1	0	0	1	0	EC
30	12	64	0	1	0	1	1	0	0	0	1	0	0	1	1	0	0	0	0	0	0	0	0	1	0	0	1	0	EC
8	9	32	2	0	0	1	1	0	0	0	0	0	1	0	1	1	0	1	1	0	0	0	0	1	0	0	1	0	EC
76	23	12	1	1	0	0	1	0	0	0	0	0	1	0	0	0	0	1	0	0	0	0	0	1	0	0	1	0	EC
47	11	51	0	1	0	1	1	0	0	0	1	0	0	0	0	0	0	1	0	0	0	0	0	1	0	0	0	0	EC
9	22	54	2	1	0	1	1	0	1	0	1	0	0	0	1	0	0	1	0	0	0	0	1	1	1	1	1	0	EC
23	12	24	2	0	0	1	1	0	0	0	1	0	0	0	1	1	0	1	0	0	0	0	0	1	0	0	0	0	EC
41	5	46	2	1	0	0	1	0	0	0	0	0	1	0	1	0	0	1	0	0	0	0	0	1	0	0	1	0	EC
32	16	47	2	1	0	0	1	0	0	0	1	0	0	0	1	1	0	1	0	0	1	1	0	1	0	0	0	0	EC
38	13	16	0	1	0	0	0	1	0	0	1	0	0	0	0	0	0	0	0	0	0	0	0	1	0	0	0	0	EC
42	20	51	1	0	0	1	1	0	0	0	0	0	1	1	1	0	0	1	0	0	0	0	0	1	0	0	0	0	EC
67	0	51	0	1	0	1	0	0	1	1	1	0	0	0	1	0	0	0	0	0	0	0	0	1	0	0	1	0	EC
25	6	18	0	1	0	1	1	0	0	0	0	0	1	0	1	0	0	1	0	0	0	0	0	1	0	0	1	0	EC
24	4	51	0	0	0	1	1	0	0	0	0	0	0	0	0	0	0	1	0	0	0	0	0	1	0	0	1	0	EC
33	22	55	2	0	0	0	1	0	0	0	1	0	0	0	0	0	0	1	0	0	0	0	0	0	0	0	0	0	EC
22	9	55	0	0	0	0	1	0	0	0	1	0	0	1	1	1	0	1	0	0	0	0	0	1	0	1	1	0	EC
26	14	2	0	1	1	1	1	0	0	0	1	0	0	0	1	0	0	1	0	0	0	0	0	1	0	0	0	0	EC
30	22	18	0	0	0	1	1	0	0	0	1	0	0	0	0	0	0	1	0	0	0	0	0	1	0	0	1	0	EC
71	7	48	2	1	1	1	1	0	1	0	1	0	0	0	1	0	0	1	0	0	0	0	0	1	0	0	1	0	EC
83	6	36	0	0	0	0	1	0	0	1	1	0	0	0	1	0	0	1	1	0	0	0	0	1	0	0	1	0	EC
20	2	37	0	1	0	0	1	0	0	1	1	0	0	0	0	0	0	1	0	0	0	0	0	0	0	0	0	0	EC
27	6	37	0	1	0	0	1	0	0	0	1	0	0	0	1	0	0	0	0	0	0	0	0	1	0	0	1	0	EC
22	7	47	2	1	0	0	1	0	0	1	0	0	0	0	0	0	0	1	0	0	0	0	0	1	0	0	1	0	EC
23	20	47	2	0	0	0	1	0	1	1	1	0	0	0	1	0	0	0	0	0	0	0	0	1	0	1	1	0	EC
21	7	45	2	1	0	1	1	0	0	0	1	0	0	0	1	0	0	1	0	0	0	0	0	1	0	1	1	0	EC
64	24	57	1	0	0	1	1	0	1	0	1	0	0	0	1	0	0	1	0	0	0	0	1	1	1	1	1	0	EC
27	9	43	0	1	0	1	1	0	0	0	1	0	0	0	0	0	0	0	0	0	0	0	0	1	0	0	0	0	EC
19	14	52	0	0	0	1	0	1	0	1	0	0	1	0	0	0	0	1	0	0	0	0	1	1	1	1	1	1	EC
23	24	63	2	1	0	1	1	0	0	0	1	0	0	0	1	0	0	1	0	0	0	0	0	0	0	0	0	0	EC
24	4	64	1	1	0	1	1	0	0	0	1	0	0	0	0	0	0	0	1	0	0	0	0	1	0	0	0	0	EC
4	11	35	0	1	0	1	1	0	0	0	1	0	0	0	1	0	0	1	1	0	0	0	0	1	0	0	0	0	EC
44	17	15	2	1	0	0	1	0	0	1	0	0	1	0	0	0	0	0	0	0	0	0	0	1	0	0	1	0	EC
41	12	66	2	1	0	1	1	0	0	0	1	0	0	0	1	0	0	1	0	0	0	0	0	1	0	0	1	0	EC
22	18	21	0	1	0	0	1	0	0	1	0	1	0	0	0	0	0	1	0	0	1	1	1	1	1	1	1	1	EC
21	8	25	0	1	0	1	1	0	0	0	1	0	0	0	0	0	0	1	0	0	0	0	0	1	0	0	0	0	EC
23	6	9	2	1	0	0	1	0	0	0	0	0	0	0	0	0	0	0	0	0	0	0	0	1	0	0	1	0	EC
24	17	38	1	1	0	1	1	0	0	0	1	0	0	0	0	0	0	1	0	0	0	0	0	1	0	1	1	0	EC
36	10	27	0	0	0	0	1	0	0	0	0	0	1	0	0	0	0	1	1	0	0	0	0	0	0	0	0	0	EC
25	17	38	0	1	0	1	1	0	0	0	0	0	0	1	1	0	0	1	0	0	0	0	1	1	0	1	1	0	EC
24	6	39	1	1	0	1	1	0	0	0	1	0	0	0	0	1	0	1	0	0	0	0	0	1	0	1	1	0	EC
27	14	39	2	1	0	1	1	0	0	0	0	0	0	0	1	0	0	0	1	0	0	0	0	1	0	1	1	0	EC
23	3	58	2	1	0	1	1	0	0	1	0	1	0	0	1	0	0	0	0	0	0	1	1	1	0	1	1	0	EC
34	19	20	0	1	0	0	0	1	0	0	1	0	0	1	1	0	0	1	0	0	0	0	0	1	0	0	1	0	EC
55	0	48	2	0	0	1	1	0	0	0	1	0	0	1	1	0	1	0	0	0	0	0	1	1	1	1	1	1	EC
30	11	31	2	1	0	0	1	0	0	0	1	0	0	0	0	0	0	1	0	0	0	0	1	1	0	1	1	0	EC
32	15	46	2	1	0	1	1	0	0	1	1	0	0	1	0	0	0	0	0	0	0	0	0	1	0	1	1	0	EC
23	8	42	0	0	0	1	1	0	0	0	0	0	0	0	0	0	0	1	0	0	0	0	0	1	0	0	1	0	EC
26	4	34	0	1	1	1	1	0	0	0	1	0	0	0	0	0	0	1	0	0	0	0	0	1	0	0	1	0	EC
34	14	27	2	0	0	0	1	0	0	0	1	0	0	0	1	0	1	0	0	0	0	0	1	1	1	1	1	1	EC
90	7	41	2	0	1	1	1	0	0	0	1	0	0	0	1	0	0	1	0	0	0	0	0	1	0	0	1	0	EC
34	9	49	0	1	1	0	0	1	1	1	0	0	1	0	1	0	0	1	0	0	0	0	0	1	0	1	1	0	EC
27	23	51	2	1	1	0	1	0	0	1	1	0	0	0	1	0	0	1	0	0	0	0	0	1	0	1	1	0	EC
44	8	52	0	1	1	0	1	0	0	0	1	0	0	0	1	0	0	1	0	0	0	0	0	1	0	1	1	0	EC
53	5	21	0	1	0	1	1	0	0	0	1	0	0	1	1	0	0	0	0	0	0	0	0	1	0	0	0	0	EC
52	13	22	2	0	0	1	1	0	0	0	0	0	1	0	1	0	0	1	0	0	0	0	1	1	1	1	1	0	EC
135	4	17	0	0	0	0	1	0	0	0	1	0	0	0	0	0	0	1	0	0	0	0	0	1	0	0	1	0	EC
61	23	51	2	0	0	1	1	0	0	0	0	0	1	1	0	0	0	1	0	0	0	0	0	1	0	0	1	0	EC
32	7	33	0	0	0	0	1	0	0	0	0	1	0	0	0	1	0	1	0	0	0	0	0	0	0	0	0	0	EC
49	7	38	0	1	0	0	0	1	0	0	1	0	0	0	1	0	0	1	0	0	0	0	0	1	0	1	0	0	EC
58	19	25	1	0	0	0	0	1	0	1	0	0	1	0	0	0	0	1	0	0	0	0	1	1	1	1	1	1	EC
19	6	39	0	1	0	0	1	0	0	0	1	0	0	0	0	0	0	1	0	0	0	0	1	1	1	1	1	0	EC
25	12	39	0	1	0	0	1	0	0	0	1	0	0	0	1	0	0	1	1	0	0	0	1	1	1	1	1	1	EC
72	13	50	2	1	0	1	1	0	0	1	0	0	1	0	0	0	0	0	1	0	0	1	0	0	0	1	0	0	EC
87	28	43	2	0	0	0	1	0	0	0	1	0	0	1	1	0	0	1	0	0	0	0	1	1	1	1	1	1	EC
23	22	27	0	1	1	0	0	1	0	0	0	0	1	0	1	0	0	1	0	0	0	0	1	1	1	1	1	1	EC
25	15	15	2	1	0	1	1	0	0	0	0	0	0	0	0	1	0	1	0	0	0	0	0	1	0	0	1	0	EC
35	15	15	0	1	0	1	1	0	0	0	1	0	0	0	1	0	0	1	1	0	0	0	0	1	0	0	1	0	EC
18	26	1	2	0	0	0	1	0	0	0	0	0	0	0	0	0	0	1	1	0	0	0	0	1	0	0	1	0	EC
86	7	49	0	1	0	1	1	0	0	0	1	0	0	0	1	0	0	0	0	0	0	0	0	1	0	0	0	0	EC
85	11	52	2	0	0	1	1	0	0	0	0	0	1	0	0	0	0	1	0	0	0	0	0	1	0	1	1	0	EC
85	4	50	0	0	0	1	1	0	0	0	1	0	0	0	1	0	0	1	1	0	0	0	0	0	0	0	0	0	EC
25	4	6	0	1	0	1	1	0	0	0	1	0	0	0	1	0	0	1	0	0	0	0	0	0	0	0	0	0	EC
28	7	9	1	0	0	0	1	0	0	0	0	1	0	0	0	0	0	1	0	0	0	0	0	1	0	1	1	0	EC
31	0	58	2	1	0	1	1	0	1	0	1	0	0	0	1	0	1	0	0	0	0	0	1	1	1	1	1	1	EC
26	5	60	0	1	0	0	1	0	1	0	1	0	0	0	0	0	0	1	0	0	0	0	0	1	0	0	1	0	EC
28	19	49	0	1	0	1	1	0	0	0	0	0	1	0	0	1	0	1	0	0	0	0	0	1	0	0	1	0	EC
50	4	1	0	1	0	1	1	0	0	0	1	0	0	0	1	0	0	0	0	0	0	0	0	1	0	0	0	0	EC
62	9	45	1	0	0	1	0	1	0	1	0	0	1	0	1	0	0	1	0	0	0	0	1	1	1	1	1	1	EC
47	8	3	2	1	0	0	1	0	0	0	1	0	0	0	0	0	0	1	0	0	0	0	0	0	0	0	0	0	EC
49	14	54	2	0	0	1	1	0	0	1	0	0	1	0	0	0	0	1	0	0	0	0	0	1	0	0	1	0	EC
157	7	54	0	0	0	1	1	0	0	0	0	0	1	1	0	0	0	0	0	0	0	0	0	1	0	0	1	0	EC
26	10	6	0	1	0	1	1	0	0	0	1	0	0	0	1	0	0	1	0	0	0	0	0	1	0	0	1	0	EC
20	12	49	0	0	0	1	1	0	0	0	1	0	0	0	0	0	0	0	0	0	0	0	0	1	0	0	1	0	EC
28	0	1	2	1	0	0	1	0	0	1	0	0	0	0	0	0	0	0	0	0	1	0	0	1	0	0	1	0	EC
42	3	19	0	1	0	0	0	1	1	0	1	0	0	0	1	1	0	1	0	0	0	0	0	0	0	0	0	0	EC
35	7	19	0	1	0	1	1	0	0	0	1	0	0	0	1	0	0	1	0	0	0	0	0	1	0	0	1	0	EC
35	19	61	1	0	0	1	1	0	0	1	1	0	0	0	1	0	0	1	1	0	0	0	1	1	1	1	1	0	EC
21	15	32	2	0	0	0	1	0	0	0	0	0	0	0	0	0	0	1	0	0	0	0	0	0	0	0	0	0	EC
27	21	24	0	1	0	0	1	0	0	0	1	0	0	0	0	0	0	0	1	0	0	0	0	1	0	0	1	0	EC
27	5	10	2	1	0	0	1	0	0	0	1	0	0	0	0	0	0	1	0	0	0	0	0	0	0	0	0	0	EC
79	12	53	0	0	0	0	1	0	0	0	1	0	0	0	0	1	0	0	0	0	0	0	0	1	0	0	1	0	EC
56	5	18	1	0	0	0	1	0	0	0	0	0	1	0	1	0	0	1	0	0	1	0	0	1	0	0	1	0	EC
80	7	15	2	0	0	0	1	0	0	0	0	1	0	1	1	0	0	1	0	0	0	0	1	1	1	0	1	0	EC
30	5	52	1	1	0	1	1	0	0	0	0	0	0	0	1	0	0	1	0	0	0	0	0	1	0	1	1	0	EC
14	9	47	1	1	0	1	1	0	0	0	1	0	0	0	0	0	0	1	0	0	0	0	0	1	0	0	0	0	EC
10	23	59	0	1	0	1	1	0	0	1	1	0	0	0	1	0	0	1	0	0	0	0	1	1	0	1	1	0	EC
22	35	59	0	1	0	1	1	0	0	1	1	0	0	0	1	0	0	1	0	0	0	0	1	1	1	1	1	1	EC
37	15	54	1	0	0	1	0	1	0	0	0	0	0	0	0	0	0	0	0	0	0	0	0	1	0	0	1	0	EC
27	14	66	1	1	0	1	1	0	1	0	0	1	0	1	1	1	0	0	0	0	0	0	0	1	0	0	1	0	EC
62	14	66	1	1	0	1	1	0	1	0	1	0	0	1	1	1	0	1	0	0	0	0	0	1	0	0	1	0	EC
24	10	42	2	0	0	0	1	0	0	0	0	0	1	0	0	0	0	1	0	0	0	0	0	1	0	0	1	0	EC
27	14	43	0	0	0	0	0	1	0	0	0	0	0	0	0	0	0	1	0	0	0	0	0	1	0	1	1	0	EC
39	3	43	0	0	0	0	0	1	0	1	0	0	0	0	1	1	0	0	0	0	0	0	0	1	0	1	0	0	EC
24	13	37	2	1	0	1	1	0	0	0	1	0	0	1	0	0	0	1	0	0	0	0	1	1	1	0	0	0	EC
48	9	52	1	0	0	1	1	0	0	0	1	0	0	0	0	0	0	1	0	0	0	0	1	0	1	0	0	0	EC
44	0	19	0	1	1	0	1	0	0	0	1	0	0	0	0	0	0	0	0	0	0	0	1	1	1	0	1	0	EC
19	0	19	0	1	1	0	1	0	0	0	1	0	0	0	1	1	0	0	0	0	0	0	0	1	0	0	1	0	EC
21	24	4	2	1	0	1	1	0	0	0	1	0	0	0	0	0	0	1	0	0	0	0	0	1	0	0	1	0	EC
19	29	50	2	1	0	1	1	0	0	0	1	0	0	0	1	1	1	0	0	0	0	0	1	1	0	1	1	0	EC
39	10	31	0	1	0	1	1	0	0	0	0	0	1	1	1	0	0	1	0	0	0	0	0	1	0	0	0	0	EC
33	8	14	0	0	0	1	1	0	0	0	1	0	0	0	1	0	0	0	0	0	0	0	0	1	0	1	1	0	EC
31	8	14	0	0	0	1	1	0	0	0	1	0	0	0	1	0	0	1	0	0	0	0	0	1	0	0	1	0	EC
23	8	34	2	0	0	0	1	0	0	1	1	0	0	0	0	0	0	1	0	0	0	0	0	1	0	0	0	0	EC
24	16	47	0	1	0	0	0	1	0	1	1	0	0	0	0	0	0	0	0	0	0	0	0	1	0	0	1	0	EC
84	25	39	0	1	0	0	1	0	0	1	0	1	0	0	1	0	1	1	0	0	0	0	0	1	0	0	1	0	EC
29	15	33	2	1	0	1	1	0	0	0	0	0	0	0	1	0	0	0	0	0	0	0	0	1	0	1	1	0	EC
12	12	49	0	0	0	1	1	0	0	0	1	0	0	1	1	0	0	1	0	0	0	0	0	1	0	0	0	0	EC
34	19	3	2	0	0	0	1	0	0	1	1	0	0	0	0	0	0	1	0	0	0	0	0	1	0	0	1	0	EC
24	19	44	2	0	0	1	1	0	0	1	0	0	1	1	1	1	0	1	0	0	0	0	0	1	0	0	1	0	EC
38	5	45	0	0	0	1	1	0	0	0	0	0	1	1	1	0	0	1	0	0	0	0	0	1	0	0	1	0	EC
21	5	14	2	1	0	0	1	0	0	1	1	0	0	0	0	0	0	1	0	0	0	0	0	0	0	0	0	0	EC
77	6	53	0	1	0	1	1	0	0	1	0	0	1	0	1	0	0	1	0	0	0	0	0	0	0	0	0	0	EC
58	17	19	2	1	0	0	1	0	0	0	0	0	1	0	1	0	0	1	0	0	0	0	0	1	0	0	0	0	EC
27	9	26	0	0	0	1	0	1	0	1	0	0	1	0	1	0	0	1	0	0	0	0	1	1	1	1	1	0	EC
50	10	30	0	1	0	1	1	0	0	0	0	0	1	1	1	0	0	1	0	0	0	0	1	1	0	1	1	0	EC
96	11	13	2	1	1	1	1	0	0	0	0	0	1	0	1	0	0	1	0	0	0	0	0	1	0	0	1	0	EC
21	10	52	2	0	0	1	1	0	0	0	0	0	0	0	0	0	0	1	0	0	0	0	0	1	0	0	1	0	EC
24	11	35	2	1	0	1	1	0	0	1	1	0	0	0	0	0	1	1	0	0	1	1	1	1	1	1	1	1	EC
32	11	53	2	1	0	1	1	0	0	0	1	0	0	0	1	1	0	1	1	0	0	0	1	1	1	1	1	0	EC
54	0	53	1	1	0	1	0	0	0	0	1	0	0	0	0	0	0	0	0	0	0	0	0	1	0	0	1	0	EC
20	1	53	1	1	0	1	0	0	0	0	1	0	0	0	1	0	0	0	1	0	0	1	1	1	1	0	1	0	EC
84	0	51	0	1	0	1	0	1	1	1	1	0	0	1	1	0	0	0	0	0	0	0	0	1	0	0	1	0	EC
84	0	51	0	1	0	1	0	1	1	1	1	0	0	1	1	1	0	0	0	0	0	0	0	1	0	0	1	0	EC
28	46	32	2	1	0	1	1	0	0	1	1	0	0	0	1	0	0	1	0	0	0	0	1	1	1	1	0	1	EC
84	8	12	2	1	0	0	1	0	0	0	1	0	0	0	0	0	0	1	0	0	0	0	0	1	0	1	1	0	EC
19	13	22	0	0	1	1	0	1	0	1	0	0	0	0	1	0	0	0	0	0	0	0	1	1	1	1	1	0	EC
28	0	22	0	0	0	1	0	0	0	1	1	0	0	0	1	0	0	0	0	0	0	0	1	1	1	1	1	1	EC
19	20	52	2	1	0	1	1	0	0	0	1	0	0	0	1	0	0	1	0	0	0	0	0	1	0	0	1	0	EC
84	22	42	2	0	0	0	1	0	1	1	0	0	1	0	1	0	0	1	1	0	0	0	1	1	0	1	1	0	EC
23	5	27	0	0	0	0	1	0	0	0	1	0	0	0	1	0	0	1	0	0	0	0	0	1	0	1	0	0	EC
21	10	36	0	0	0	0	1	0	0	1	1	0	0	0	0	0	0	0	0	0	0	0	0	1	0	0	1	0	EC
43	18	46	0	0	0	1	1	0	0	0	1	0	0	0	0	0	0	0	0	0	0	0	0	1	0	0	1	0	EC
24	13	41	0	0	0	1	1	0	0	0	1	0	0	0	0	0	0	1	0	0	0	0	0	1	0	1	1	0	EC
43	22	16	2	0	0	0	1	0	0	0	0	0	1	0	0	0	0	1	0	0	0	0	0	1	0	0	1	0	EC
17	14	43	2	1	0	1	1	0	0	1	1	0	0	0	1	1	0	1	0	0	0	0	1	1	1	1	1	0	EC
20	7	44	0	1	0	1	1	0	0	0	1	0	0	1	1	0	0	1	0	0	0	0	0	1	0	0	1	0	EC
30	12	23	2	1	0	1	1	0	0	0	0	0	0	0	1	0	0	1	0	0	0	0	0	0	0	0	0	0	EC
31	3	11	0	0	0	0	1	0	0	0	1	0	0	0	1	0	0	0	0	0	0	0	0	1	0	0	1	0	EC
27	31	47	1	1	0	1	1	0	0	0	1	0	0	1	1	1	0	1	1	0	0	0	0	1	0	0	1	0	EC
69	17	30	0	0	0	0	1	0	0	1	1	0	0	1	1	0	0	1	1	0	0	0	0	1	0	0	1	0	EC
15	17	58	0	0	0	1	1	0	0	1	1	0	0	0	1	0	0	1	1	0	0	0	0	0	0	0	0	0	EC
25	10	49	0	0	0	1	1	0	0	1	0	0	1	0	0	1	0	1	0	0	0	0	0	1	0	1	1	0	EC
30	11	6	2	1	0	0	1	0	0	1	0	0	0	0	0	0	0	1	0	0	0	0	0	0	0	0	0	0	EC
34	22	63	2	0	0	1	1	0	0	1	0	1	0	0	1	0	0	1	0	0	0	0	0	1	0	0	1	0	EC
20	28	67	2	0	0	0	1	0	0	0	0	1	0	0	0	0	0	1	0	0	0	1	0	1	0	0	1	0	EC
32	34	62	2	1	0	1	1	0	1	1	1	0	0	0	1	0	0	1	0	0	0	0	0	1	0	0	0	0	EC
75	50	62	2	1	0	1	1	0	1	1	1	0	0	0	1	0	0	0	1	0	0	0	0	1	0	1	1	0	EC
31	11	22	1	1	0	1	0	0	0	0	1	0	0	1	1	0	0	1	0	0	0	0	0	0	0	0	0	0	EC
48	10	13	1	1	0	1	1	0	0	0	0	0	0	0	0	0	0	1	0	0	0	0	0	0	0	0	0	0	EC
19	11	39	0	1	0	1	1	0	0	1	1	0	0	0	1	1	0	1	0	0	0	0	0	1	0	1	0	0	EC
13	8	39	0	1	0	1	1	0	0	0	0	0	1	0	1	1	0	1	0	0	1	0	0	1	0	0	1	0	EC
40	20	13	1	1	0	0	1	0	0	0	0	1	0	0	1	0	0	1	0	0	0	1	0	1	0	1	1	0	EC
40	8	35	0	0	0	1	1	0	0	0	1	0	0	1	1	0	0	1	0	0	0	0	0	1	0	0	0	0	EC
27	12	17	0	1	0	1	1	0	0	0	0	0	1	0	1	0	0	1	0	0	0	0	0	1	0	1	1	0	EC
23	21	1	2	1	0	0	1	0	0	0	1	0	0	0	1	0	0	0	1	0	0	0	0	1	0	0	1	0	EC
45	18	57	2	1	0	1	1	0	1	1	0	1	0	1	1	1	0	1	0	0	0	0	0	1	0	1	1	0	EC
96	9	58	0	1	0	1	1	0	1	0	1	0	0	1	1	1	0	1	0	0	0	0	0	1	0	1	1	0	EC
22	34	56	1	0	0	1	1	0	0	0	1	0	0	0	0	0	0	1	0	0	0	0	0	1	0	1	1	0	EC
28	5	34	0	1	0	0	1	0	0	1	0	0	0	0	0	0	0	1	0	0	1	0	0	1	0	0	0	0	EC
21	14	45	0	0	0	0	0	1	0	1	0	0	0	0	1	0	0	1	1	0	0	0	0	0	0	0	0	0	EC
52	9	61	2	1	0	1	1	0	0	0	1	0	0	0	1	0	0	1	0	0	0	0	0	1	0	1	1	0	EC
52	16	46	0	1	0	0	0	1	0	1	0	0	0	0	0	0	0	1	0	0	0	0	0	1	0	1	1	0	EC
24	3	49	1	1	0	1	1	0	0	0	1	0	0	0	1	0	0	1	0	0	0	0	0	1	0	0	0	0	EC
39	4	31	0	1	0	1	1	0	0	0	0	0	1	1	1	0	0	1	0	0	0	0	0	1	0	0	1	0	EC
6	6	48	0	0	0	1	1	0	0	0	1	0	0	0	0	0	0	1	0	0	0	0	0	1	0	0	0	0	EC
56	13	12	2	1	0	1	1	0	0	0	0	0	1	0	1	0	0	0	0	0	0	0	0	0	0	0	0	0	EC
16	16	12	2	1	0	1	1	0	0	0	1	0	0	0	1	0	0	0	0	1	0	0	0	0	0	0	0	0	EC
31	9	58	2	1	0	1	1	0	0	0	1	0	0	0	1	0	0	1	0	0	0	0	0	0	0	0	0	0	EC
59	13	34	0	0	0	0	0	1	0	1	0	0	1	0	0	0	0	1	0	0	0	0	0	1	0	0	0	0	EC
10	21	58	2	1	0	1	1	0	0	0	1	0	0	0	0	0	0	1	0	0	0	0	0	1	0	1	0	0	EC
21	12	34	0	0	0	0	1	0	0	1	0	0	1	1	1	0	0	1	0	0	0	0	0	0	0	0	0	0	EC
21	9	59	1	0	0	1	1	0	1	0	1	0	0	0	1	0	0	0	0	0	0	0	0	1	0	1	1	0	EC
29	10	59	1	0	0	1	1	0	0	0	1	0	0	0	1	0	0	1	1	0	0	0	0	0	0	0	0	0	EC
52	5	40	0	0	0	1	1	0	0	0	1	0	0	0	1	0	0	1	0	0	0	0	0	0	0	0	0	0	EC
18	8	53	0	1	0	1	1	0	0	0	1	0	0	1	1	0	0	1	0	0	0	0	0	1	0	0	1	0	EC
21	10	53	0	1	0	1	1	0	0	0	1	0	0	1	1	0	0	1	0	0	1	0	0	1	0	0	1	0	EC
29	9	11	0	1	0	1	1	0	0	0	1	0	0	0	1	0	0	1	0	0	0	0	0	1	0	0	1	0	EC
26	14	11	0	1	0	1	1	0	0	0	1	0	0	0	1	0	0	1	0	0	0	0	0	1	0	0	1	0	EC
25	0	53	0	0	0	1	0	1	0	0	1	0	0	0	0	0	0	0	0	0	0	0	0	1	0	0	1	0	EC
19	0	54	0	0	0	1	0	1	0	0	1	0	0	0	1	0	0	0	0	0	0	0	0	1	0	0	1	0	EC
22	5	53	2	1	0	1	1	0	0	0	1	0	0	0	0	0	0	1	0	0	0	0	0	1	0	0	1	0	EC
25	17	32	2	1	0	1	1	0	0	1	0	0	1	0	1	0	0	1	0	0	0	0	0	1	0	0	1	0	EC
21	10	74	2	1	0	1	1	0	0	0	1	0	0	0	1	0	1	1	0	0	0	0	1	1	1	1	1	1	EC
108	29	29	1	1	0	1	1	0	0	0	1	0	0	0	1	1	0	1	0	0	0	0	0	1	0	0	1	0	EC
21	7	45	1	1	0	1	1	0	0	0	0	0	0	0	0	0	0	0	0	0	0	0	0	1	0	0	1	0	EC
116	54	18	0	0	0	0	1	0	0	0	1	0	0	0	1	0	0	1	0	0	0	0	0	0	0	0	0	0	EC
23	0	13	2	0	0	0	1	0	0	1	1	0	0	0	0	0	0	0	0	0	0	0	0	1	0	0	1	0	EC
60	4	21	0	0	0	1	1	0	0	0	0	0	1	0	0	0	0	1	0	0	0	0	0	0	0	0	0	0	EC
39	9	21	0	0	0	1	1	0	0	0	1	0	0	0	1	0	0	1	0	0	0	0	0	0	0	0	0	0	EC
20	8	15	0	1	0	0	1	0	0	0	0	0	1	0	0	0	0	1	0	0	0	0	0	0	0	0	0	0	EC
33	36	60	1	0	0	1	1	0	0	1	1	0	0	1	1	0	0	1	0	0	0	0	0	1	0	0	1	0	EC
25	16	38	2	0	0	1	1	0	0	1	1	0	0	0	0	0	0	1	0	1	0	0	1	1	0	0	1	0	EC
26	2	53	0	1	0	1	1	0	0	0	1	0	0	0	1	0	0	1	0	0	0	0	0	1	0	1	1	0	EC
41	0	53	0	1	0	1	1	0	0	0	1	0	0	0	1	0	0	0	0	0	0	0	0	1	0	0	1	0	EC
40	17	33	2	1	0	1	1	0	0	0	0	0	1	1	0	0	0	1	0	0	0	0	1	1	1	1	1	0	EC
23	15	40	1	0	0	1	1	0	0	0	1	0	0	0	0	0	0	1	0	0	0	0	0	1	0	0	0	0	EC
39	5	29	0	1	0	0	1	0	0	0	1	0	0	0	0	0	0	1	0	0	0	0	0	1	0	0	0	0	EC
25	10	12	0	1	0	1	1	0	0	0	1	0	0	0	1	0	0	1	0	0	0	0	0	1	0	0	1	0	EC
22	7	38	0	0	0	1	1	0	0	0	1	0	0	1	1	0	0	1	0	0	0	0	0	1	0	0	1	0	EC
19	9	57	0	1	0	1	1	0	1	0	1	0	0	0	1	1	0	1	0	0	0	0	1	1	1	1	1	0	EC
8	2	38	0	0	0	0	1	0	0	0	1	0	0	0	1	1	0	1	0	0	0	0	0	1	0	0	0	0	EC
42	18	30	0	1	0	1	1	0	1	0	1	0	0	0	1	1	0	1	0	0	0	0	1	1	1	1	1	0	EC
53	8	58	0	0	0	0	1	0	0	0	1	0	0	0	1	0	0	1	0	0	0	0	0	1	0	0	1	0	EC
83	2	54	1	0	0	1	1	0	0	1	0	0	0	0	1	0	0	0	0	0	0	0	0	1	0	0	1	0	EC
23	3	20	0	0	0	1	1	0	0	0	1	0	0	0	1	1	0	1	0	0	0	0	0	1	0	0	0	0	EC
50	4	20	0	0	0	1	1	0	0	0	0	0	0	0	1	1	0	0	0	0	0	0	0	0	0	0	0	0	EC
64	39	13	2	1	0	0	1	0	0	0	1	0	0	0	1	0	0	1	0	0	0	0	0	0	0	0	0	0	EC
26	8	25	2	1	0	1	1	0	0	0	1	0	0	0	0	0	0	1	0	0	0	0	0	1	0	0	0	0	EC
20	5	17	1	0	0	1	1	0	0	0	1	0	0	0	1	0	0	1	0	0	0	0	0	1	0	0	1	0	EC
19	10	8	0	0	0	1	1	0	0	0	1	0	0	0	1	0	0	1	0	0	0	0	0	0	0	0	0	0	EC
33	13	47	2	0	0	1	1	0	0	1	1	0	0	0	1	0	1	1	0	0	0	0	1	1	1	1	1	1	EC
31	30	21	0	0	0	0	1	0	0	1	0	1	0	0	0	1	1	0	0	0	0	0	0	1	0	1	1	0	EC
36	37	54	1	1	1	1	1	0	0	1	0	1	0	1	1	0	0	1	0	0	0	0	1	1	1	0	1	0	EC
51	18	25	2	0	0	1	1	0	0	0	1	0	0	0	1	0	0	1	0	0	0	0	0	0	0	0	0	0	EC
28	10	25	0	0	0	1	1	0	0	1	0	0	0	0	1	0	0	1	0	0	1	0	0	0	0	0	0	0	EC
58	9	65	0	0	0	1	1	0	0	0	1	0	0	1	1	0	0	1	0	0	1	0	1	1	0	1	1	0	EC
67	0	27	0	1	0	0	1	0	0	0	0	0	0	1	1	0	0	0	1	0	0	0	0	1	0	0	0	0	EC
28	14	5	0	0	0	1	1	0	0	0	1	0	0	0	1	0	0	1	0	0	0	0	0	0	0	0	0	0	EC
11	4	43	0	0	0	1	1	0	0	0	1	0	0	0	0	0	0	1	0	0	0	0	0	1	0	0	0	0	EC
6	39	14	1	0	0	0	1	0	0	0	0	0	1	0	1	0	0	1	0	0	0	0	0	1	0	1	1	0	EC
86	5	19	0	1	0	0	1	0	0	0	1	0	0	0	0	0	0	1	0	0	0	0	0	0	0	0	0	0	EC
30	24	8	0	1	0	1	0	1	0	1	0	0	0	0	1	0	0	1	0	0	0	0	0	0	0	0	0	0	EC
27	22	40	2	0	0	1	1	0	0	1	0	0	1	1	1	0	0	1	1	0	0	0	0	1	0	0	1	0	EC
31	9	57	2	0	0	1	1	0	0	0	1	0	0	0	1	0	0	1	0	0	0	0	0	0	0	0	0	0	EC
14	7	13	2	0	0	0	1	0	0	0	1	0	0	0	0	0	0	0	0	0	0	0	0	1	0	0	0	0	EC
18	15	12	0	1	0	1	1	0	0	0	1	0	0	0	1	0	0	1	0	0	0	0	0	1	0	0	1	0	EC
25	0	17	2	1	0	1	1	0	0	0	0	0	1	0	0	0	0	0	0	0	0	0	1	1	1	1	1	0	EC
8	7	18	0	1	0	1	1	0	0	0	1	0	0	1	0	0	0	1	0	0	0	0	1	1	1	1	1	1	EC
30	9	53	2	1	0	0	1	0	0	0	0	1	0	0	0	1	0	1	0	0	0	0	0	1	0	0	1	0	EC
34	17	11	2	1	0	0	1	0	0	1	0	0	0	0	0	0	0	1	0	0	0	0	0	1	0	1	1	0	EC
24	13	70	2	1	0	1	1	0	0	0	1	0	0	0	0	0	0	1	0	0	0	0	0	1	0	1	1	0	EC
64	8	52	0	1	0	1	1	0	0	0	1	0	0	0	0	0	0	1	0	0	0	0	0	1	0	0	1	0	EC
27	14	1	2	0	0	1	1	0	0	0	1	0	0	0	1	0	0	1	0	0	0	0	0	0	0	0	0	0	EC
21	5	13	2	1	0	1	1	0	0	1	0	0	0	0	1	0	0	1	0	0	0	0	0	0	0	0	0	0	EC
34	4	36	1	1	0	0	1	0	0	1	0	1	0	0	0	0	0	1	0	0	0	1	0	0	0	0	0	0	EC
63	16	20	0	1	0	1	0	1	0	0	0	0	1	0	0	0	0	1	0	0	0	0	0	1	0	0	1	0	EC
24	19	49	1	1	0	1	0	1	0	0	0	0	1	0	0	0	0	1	0	0	0	0	0	1	0	0	1	0	EC
36	7	53	2	0	0	1	1	0	0	0	0	0	0	0	0	0	0	0	0	0	0	0	0	1	0	0	1	0	EC
29	7	49	2	0	0	0	1	0	0	0	1	0	0	0	0	0	0	0	0	0	0	0	0	0	0	0	0	0	EC
36	6	21	0	0	0	0	1	0	0	0	1	0	0	0	1	0	0	1	0	0	0	0	0	0	0	0	0	0	EC
41	8	46	0	0	0	1	1	0	0	0	1	0	0	0	0	0	0	1	0	0	0	0	0	1	0	0	1	0	EC
25	13	32	0	0	0	1	1	0	0	0	1	0	0	0	1	0	0	1	0	0	0	0	0	1	0	0	1	0	EC
12	10	37	2	0	0	1	1	0	0	0	1	0	0	0	1	0	0	1	0	0	0	0	0	0	0	0	0	0	EC
24	13	53	1	0	0	1	0	0	0	1	0	0	0	0	0	0	0	1	0	0	0	0	0	0	0	1	0	0	EC
72	10	41	2	0	0	0	1	0	0	1	0	0	1	0	0	0	0	0	0	0	0	0	0	0	0	0	0	0	EC
24	5	31	0	1	0	0	0	0	0	0	0	0	1	0	1	1	0	1	0	0	0	0	0	1	0	0	1	0	EC
21	14	31	0	1	0	1	0	1	0	0	0	0	0	0	1	0	0	1	0	1	0	0	0	1	0	0	1	0	EC
20	8	51	0	0	0	0	1	0	1	1	0	0	0	0	0	0	0	0	0	0	0	0	0	1	0	1	0	0	EC
19	4	49	0	0	0	0	1	0	0	0	0	0	0	0	1	0	0	1	0	0	0	0	0	1	0	0	1	0	EC
28	9	22	0	1	0	0	1	0	0	0	0	0	0	0	1	0	0	1	0	0	0	0	0	1	0	0	0	0	EC
24	16	41	1	0	0	1	1	0	0	0	0	0	0	0	0	0	0	1	0	0	1	0	0	0	0	0	0	0	EC
24	3	61	0	1	0	1	1	0	0	0	1	0	0	0	1	0	0	1	0	0	0	0	0	1	0	0	1	0	EC
21	11	52	2	1	0	0	1	0	0	0	1	0	0	0	0	0	0	1	0	0	0	0	0	1	0	0	0	0	EC
92	7	16	0	0	0	0	1	0	0	0	1	0	0	0	1	0	0	1	0	0	0	0	0	1	0	0	0	0	EC
18	9	52	0	1	0	1	1	0	0	0	1	0	0	0	1	0	0	1	0	0	0	0	0	0	0	0	0	0	EC
22	9	49	0	0	0	1	1	0	0	1	1	0	0	1	1	0	0	1	1	0	0	0	0	0	0	0	0	0	EC
31	6	41	2	1	0	0	1	0	1	0	0	0	1	0	0	0	0	1	0	0	0	0	0	1	0	0	0	0	EC
28	17	42	0	1	0	0	1	0	1	0	0	0	1	0	1	1	0	1	1	0	0	0	0	1	0	0	1	0	EC
29	12	57	1	0	0	1	0	1	1	1	0	0	1	0	0	0	0	1	0	0	0	0	0	1	0	1	1	0	EC
12	15	16	1	1	0	0	1	0	0	0	1	0	0	0	0	0	0	1	0	0	0	0	0	1	0	0	0	0	EC
30	13	26	0	1	0	0	0	1	0	0	1	0	0	1	0	0	0	1	0	0	0	0	0	1	0	0	0	0	EC
24	10	26	0	1	0	0	0	1	0	0	1	0	0	0	0	0	0	1	0	1	0	0	0	1	0	1	1	0	EC
25	21	47	1	0	0	1	0	0	0	1	0	0	0	0	0	0	0	1	1	0	0	0	0	0	0	0	0	0	EC
30	12	48	0	1	0	1	1	0	0	0	1	0	0	0	0	0	0	0	0	0	0	0	0	1	0	1	1	0	EC
32	15	52	0	1	0	0	0	1	0	1	0	0	0	0	0	1	0	1	1	0	0	1	1	1	0	1	1	0	EC
34	4	37	0	1	0	1	1	0	0	0	1	0	0	0	1	0	0	1	0	0	0	0	0	0	0	0	0	0	EC
41	10	12	0	0	0	1	1	0	0	0	0	0	1	0	1	0	0	1	0	0	0	0	0	1	0	0	1	0	EC
48	12	12	0	0	0	1	1	0	0	0	0	0	1	0	1	0	0	0	0	0	0	0	0	1	0	0	0	0	EC
29	19	17	0	1	0	1	0	1	0	0	0	0	0	0	0	0	0	1	0	0	0	0	0	1	0	0	0	0	EC
14	12	29	1	0	0	1	0	1	0	1	0	0	0	0	1	0	0	0	0	0	0	0	0	1	0	1	1	0	EC
13	13	9	0	0	0	1	1	0	0	0	1	0	0	0	1	0	0	1	0	0	0	0	0	1	0	0	0	0	EC
13	10	36	1	0	0	1	1	0	0	0	1	0	0	1	1	0	0	1	0	0	0	0	0	1	0	0	1	0	EC
29	5	21	0	0	0	1	1	0	0	0	1	0	0	1	1	0	0	0	0	0	0	0	0	1	0	1	1	0	EC
10	11	14	0	0	0	1	1	0	0	0	1	0	0	0	1	0	0	0	0	0	0	0	0	1	0	0	0	0	EC
86	7	61	0	1	0	1	1	0	0	0	0	0	0	0	0	0	0	1	0	0	0	0	0	1	0	0	0	0	EC
38	6	51	0	0	0	0	1	0	0	1	1	0	0	1	1	0	0	1	0	0	0	0	0	0	0	0	0	0	EC
27	8	48	0	0	0	1	1	0	0	0	1	0	0	0	1	0	0	1	0	0	0	0	0	1	0	0	0	0	EC
25	13	52	0	1	0	1	1	0	0	0	0	0	0	1	0	0	0	1	0	0	0	0	0	0	0	0	0	0	EC
29	13	31	0	1	0	1	0	1	0	1	0	0	1	1	0	0	0	1	0	0	0	0	0	1	0	1	1	0	EC
45	14	41	0	0	1	1	1	0	0	0	1	0	0	0	1	0	0	1	0	0	0	0	0	1	0	0	1	0	EC
12	3	50	0	0	0	1	1	0	0	0	0	0	0	1	1	0	0	1	0	0	0	0	0	1	0	0	0	0	EC
23	8	39	0	0	0	1	1	0	0	0	1	0	0	1	0	0	0	1	0	0	0	0	0	1	0	0	1	0	EC
28	5	16	1	1	0	0	1	0	0	0	1	0	0	0	1	0	0	1	0	0	1	0	0	1	0	0	0	0	EC
48	24	24	1	1	0	1	0	1	0	1	0	0	0	0	0	0	0	1	0	0	0	0	0	1	0	0	1	0	EC
45	3	39	0	1	0	0	1	0	0	0	1	0	0	0	0	0	0	1	0	0	0	0	0	0	0	0	0	0	EC
46	10	64	0	0	0	1	1	0	0	0	0	1	0	0	1	0	0	1	0	0	0	0	0	1	0	0	1	0	EC
88	21	45	1	0	0	0	0	0	0	0	0	0	0	1	1	0	0	1	0	0	0	0	0	1	0	1	1	0	EC
49	11	53	0	0	1	1	1	0	0	0	1	0	0	0	1	0	0	1	0	0	0	0	0	0	0	0	0	0	EC
23	10	53	0	0	0	1	1	0	0	0	1	0	0	0	1	0	0	1	1	0	0	0	0	0	0	0	0	0	EC
32	21	9	0	0	0	1	1	0	0	0	0	0	1	0	1	0	0	0	0	0	0	0	0	0	0	0	0	0	EC
41	0	51	2	0	0	0	0	0	0	1	0	1	0	0	0	0	1	0	0	0	0	0	0	1	0	0	1	0	EC
36	10	34	0	1	0	1	1	0	0	0	1	0	0	0	1	0	0	1	0	0	0	0	0	0	0	0	0	0	EC
48	6	32	0	1	0	1	1	0	0	0	0	0	1	1	0	0	0	1	0	0	0	0	0	1	0	0	0	0	EC
17	16	36	2	0	0	0	1	0	0	1	1	0	0	1	1	0	0	1	1	0	0	0	0	1	0	0	0	0	EC
21	11	36	0	0	0	0	1	0	0	0	1	0	0	0	0	0	0	1	0	0	0	0	0	1	0	1	1	0	EC
21	11	29	0	1	0	1	1	0	0	0	1	0	0	0	1	0	0	1	0	0	0	0	0	1	0	0	1	0	EC
85	4	35	0	0	0	1	1	0	0	0	1	0	0	0	1	0	0	1	0	0	0	0	0	1	0	0	1	0	EC
91	7	15	2	0	0	0	1	0	0	0	0	0	0	0	0	0	0	1	0	0	0	0	0	1	0	0	1	0	EC
91	9	38	0	1	0	1	1	0	0	0	1	0	0	0	1	1	0	1	0	0	0	0	0	0	0	0	0	0	EC
91	21	22	2	1	0	0	1	0	0	0	1	0	0	0	0	1	0	0	0	0	0	0	0	1	0	0	1	0	EC
70	5	18	0	0	0	1	1	0	0	0	1	0	0	0	1	0	0	0	0	0	0	0	0	1	0	0	0	0	EC
22	5	56	0	0	0	0	1	0	0	1	0	0	0	0	1	0	0	1	0	0	0	0	1	1	0	1	1	0	EC
61	6	67	1	1	0	1	0	0	0	1	0	1	0	0	0	0	0	0	0	0	0	0	0	1	0	1	1	0	EC
61	18	33	1	0	0	1	1	0	0	0	1	0	0	0	0	1	0	0	0	0	0	0	0	1	0	0	1	0	EC
23	7	16	2	0	0	0	1	0	0	1	1	0	0	0	0	0	0	1	0	0	0	0	0	1	0	0	1	0	EC
29	13	45	0	1	0	1	1	0	0	0	1	0	0	0	1	0	0	1	1	0	0	0	0	1	0	0	1	0	EC
28	3	45	0	1	0	1	1	0	0	0	0	1	0	0	1	0	0	1	0	0	0	0	0	1	0	1	1	0	EC
28	0	30	2	0	1	0	0	0	0	1	1	0	0	0	1	1	0	0	0	0	0	0	0	1	0	0	0	0	EC
41	7	14	2	1	0	0	1	0	0	0	1	0	0	0	0	0	0	1	0	0	0	0	0	1	0	0	0	0	EC
2	6	13	2	0	0	0	1	0	0	0	1	0	0	0	0	0	0	1	0	0	0	0	0	1	0	0	1	0	EC
34	11	49	2	0	0	0	1	0	0	1	1	0	0	1	1	0	0	1	0	0	0	0	1	1	1	1	1	0	EC
20	12	35	0	0	0	1	0	1	0	1	0	0	1	0	0	0	0	1	0	0	0	0	1	0	1	1	0	1	EC
21	13	49	2	1	1	1	1	0	1	1	1	0	0	1	1	1	0	1	1	0	0	1	1	1	1	1	1	0	EC
51	14	60	2	0	0	1	1	0	0	0	1	0	0	0	0	1	0	0	0	0	0	0	1	1	1	1	1	0	EC
17	22	54	0	1	0	1	1	0	1	0	0	0	0	0	1	0	0	1	0	0	0	0	0	1	0	0	1	0	EC
28	28	5	1	0	0	0	1	0	0	0	1	0	0	0	0	0	0	1	0	0	0	0	0	1	0	0	1	0	EC
28	5	12	2	0	0	0	1	0	0	1	1	0	0	0	0	0	0	1	0	0	0	0	0	1	0	1	0	0	EC
22	15	33	1	1	0	1	0	1	1	1	0	0	0	0	0	0	0	1	0	0	1	0	0	1	0	0	1	0	EC
21	20	4	2	0	0	0	1	0	0	0	1	0	0	0	1	0	0	1	0	0	0	0	0	1	0	1	1	0	EC
2	45	43	1	0	0	1	1	0	0	1	0	0	1	0	0	1	0	1	1	0	0	0	0	1	0	0	1	0	EC
10	8	14	2	1	0	0	1	0	0	1	1	0	0	0	0	0	0	1	0	0	0	0	0	0	0	0	0	0	EC
25	9	7	0	0	0	1	1	0	0	0	1	0	0	0	1	0	0	0	0	0	0	0	0	1	0	0	1	0	EC
32	10	32	0	1	0	1	1	0	0	0	1	0	0	0	1	0	0	1	0	0	0	0	0	1	0	1	1	0	EC
19	7	53	2	0	0	0	1	0	0	0	0	0	0	0	1	0	0	1	0	0	0	0	0	1	0	1	1	0	EC
67	12	33	2	1	1	0	1	0	0	1	0	0	0	0	0	0	0	0	0	0	0	0	0	1	0	1	1	0	EC
28	10	16	2	1	0	1	1	0	0	0	0	0	1	0	1	0	0	1	0	0	0	0	0	0	0	0	0	0	EC
24	20	36	0	1	0	1	0	1	0	1	0	0	0	0	1	0	0	1	0	1	0	0	0	1	0	0	0	0	EC
29	16	37	2	0	0	1	1	0	0	0	0	1	0	0	0	0	0	1	0	0	0	0	0	0	0	0	0	0	EC
24	8	25	2	1	0	0	1	0	0	1	0	0	1	0	0	0	0	1	0	0	0	0	0	1	0	0	0	0	EC
21	0	14	2	0	0	1	0	0	0	0	1	0	0	0	0	0	0	0	0	0	0	0	0	0	0	1	0	0	EC
102	10	54	0	1	0	1	0	1	0	0	1	0	0	0	0	1	0	1	0	0	0	0	0	1	0	0	1	0	EC
23	18	55	2	0	0	1	1	0	0	1	0	1	0	0	0	0	0	1	0	0	0	0	0	1	0	0	1	0	EC
67	7	46	2	1	0	1	1	0	0	1	1	0	0	1	1	1	0	1	0	0	0	0	0	1	0	1	1	0	EC
31	30	47	0	1	0	1	1	0	0	0	0	1	0	0	1	0	0	1	0	0	0	0	0	1	0	1	1	0	EC
29	2	38	2	1	0	1	1	0	0	0	0	1	0	1	1	0	0	1	0	0	0	0	1	1	0	1	0	0	EC
53	9	42	2	0	0	1	1	0	0	0	1	0	0	0	1	0	0	1	0	0	0	0	0	1	0	0	1	0	EC
60	0	53	2	1	0	0	1	0	1	1	1	0	0	0	0	0	0	0	0	0	0	0	0	1	0	1	1	0	EC
35	17	55	2	1	0	1	1	0	0	0	0	1	0	0	1	0	0	1	0	0	0	0	0	1	0	1	1	0	EC
40	5	60	0	1	0	1	1	0	0	0	1	0	0	0	1	0	0	1	0	0	0	0	0	0	0	0	0	0	EC
22	19	9	2	0	0	0	1	0	0	0	1	0	0	0	0	0	0	1	0	0	0	0	0	1	0	0	1	0	EC
23	9	50	0	0	0	1	1	0	0	0	0	0	0	0	1	0	0	1	0	1	0	0	0	1	0	1	1	0	EC
31	29	35	2	0	0	1	1	0	0	0	0	0	0	0	0	0	0	1	0	0	0	0	0	1	0	0	0	0	EC
26	14	35	2	0	0	0	1	0	0	0	1	0	0	1	1	0	0	1	0	0	0	0	0	0	0	0	0	0	EC
30	20	8	0	1	0	0	1	0	0	0	1	0	0	0	1	0	0	1	0	0	0	0	0	0	0	0	0	0	EC
38	24	14	2	1	0	0	1	0	0	0	1	0	0	0	0	0	0	1	0	0	0	0	0	0	0	0	0	0	EC
56	11	1	1	0	0	1	0	1	0	0	0	0	1	0	1	0	0	1	0	0	0	0	0	1	0	0	1	0	EC
22	7	26	2	0	0	1	1	0	0	0	1	0	0	0	0	0	0	1	0	0	0	0	0	1	0	0	0	0	EC
12	39	10	1	1	0	0	1	0	0	1	0	1	0	0	0	0	0	1	0	0	0	0	0	0	0	0	0	0	EC
19	11	8	2	1	0	0	1	0	0	1	1	0	0	0	0	0	0	1	0	0	0	0	0	1	0	0	1	0	EC
28	12	59	0	0	0	0	1	0	0	1	0	1	0	0	1	0	0	1	0	0	0	0	0	0	0	0	0	0	EC
21	3	14	0	1	1	1	1	0	0	0	0	0	1	1	0	0	0	1	0	0	0	0	0	1	0	1	1	0	EC
43	30	50	2	0	0	1	1	0	0	0	1	0	0	0	0	0	0	1	0	0	0	0	0	0	0	0	0	0	EC
30	5	53	0	1	0	0	1	0	0	1	1	0	0	0	1	0	0	1	0	0	0	0	0	0	0	0	0	0	EC
21	7	55	2	1	0	1	1	0	1	0	0	0	0	0	1	0	0	1	0	0	0	0	0	1	0	0	0	0	EC
20	6	15	0	0	0	1	1	0	0	0	1	0	0	0	1	0	0	1	0	0	0	0	0	0	0	0	0	0	EC
25	3	17	0	0	0	0	1	0	0	0	1	0	0	0	0	0	0	0	0	0	0	0	0	0	0	0	0	0	EC
27	2	58	2	1	0	1	1	0	1	0	0	0	0	1	1	0	0	0	0	0	0	0	0	1	0	1	1	0	EC
28	10	25	1	1	0	0	1	0	0	0	1	0	0	0	1	0	0	1	0	0	0	0	0	0	0	1	0	0	EC
49	26	4	2	0	0	0	1	0	0	1	0	0	0	0	0	0	0	1	1	0	0	1	0	1	0	1	1	0	EC
40	18	43	2	1	0	0	1	0	0	0	0	0	1	0	0	0	0	0	0	0	0	0	0	1	0	0	0	0	EC
26	5	18	0	1	0	0	1	0	0	1	0	0	0	0	0	0	0	1	0	0	0	0	0	1	0	0	1	0	EC
20	2	22	2	0	0	0	1	0	0	0	1	0	0	0	0	0	0	1	0	0	0	0	0	1	0	1	1	0	EC
27	11	58	2	0	0	0	1	0	0	0	1	0	0	0	1	1	0	0	0	0	0	0	0	1	0	1	1	0	EC
20	10	62	2	0	0	1	1	0	0	0	1	0	0	0	1	0	0	1	0	0	0	0	0	1	0	0	1	0	EC
25	7	13	2	0	0	0	1	0	0	0	1	0	0	0	0	0	0	1	0	0	0	0	0	1	0	0	0	0	EC
36	11	11	2	0	0	1	1	0	0	1	0	0	0	0	0	0	1	1	0	0	0	0	1	1	1	1	1	1	EC
21	7	16	0	1	0	1	1	0	0	0	1	0	0	0	0	0	0	1	0	0	0	0	0	1	0	0	1	0	EC
26	16	24	2	0	0	1	1	0	0	0	1	0	0	0	0	0	0	1	0	0	0	0	0	1	0	0	0	0	EC
45	9	38	0	0	0	0	0	1	0	1	1	0	0	0	0	0	0	0	0	0	0	0	0	1	0	0	1	0	EC
28	22	49	2	0	0	1	1	0	0	0	0	0	0	0	0	0	0	0	0	0	0	0	0	1	0	0	0	0	EC
49	34	44	2	0	0	1	1	0	0	1	0	0	1	0	0	0	1	1	0	0	0	0	1	1	1	1	1	1	EC
26	7	30	2	1	0	1	1	0	0	0	0	0	0	0	1	0	0	1	0	0	0	0	0	1	0	0	0	0	EC
17	11	42	0	1	0	1	1	0	0	0	1	0	0	0	1	0	0	1	0	1	0	0	0	1	0	0	0	0	EC
46	34	54	1	0	0	1	1	0	0	1	0	0	0	0	0	0	0	1	0	0	0	0	0	0	0	0	0	0	EC
24	17	17	2	1	0	1	1	0	0	1	1	0	0	0	0	0	0	0	0	0	0	0	1	1	0	1	1	0	EC
28	8	20	0	1	0	0	1	0	0	0	1	0	0	0	1	0	0	1	0	0	0	0	0	1	0	0	1	0	EC
30	25	52	2	1	0	1	1	0	0	0	0	1	0	1	1	1	0	1	0	0	0	0	0	1	0	0	1	0	EC
26	7	9	2	1	0	0	1	0	0	0	1	0	0	0	0	0	0	0	0	0	0	0	0	1	0	1	1	0	EC
52	2	9	2	0	0	0	1	0	0	1	0	0	0	0	1	0	0	0	1	0	0	0	1	1	0	1	1	0	EC
39	10	60	2	0	0	1	1	0	1	0	1	0	0	0	1	0	0	1	0	0	0	0	0	1	0	0	1	0	EC
19	7	40	2	0	0	1	1	0	0	0	1	0	0	0	1	0	0	1	0	0	0	0	0	1	0	1	1	0	EC
20	6	44	2	1	0	1	1	0	0	0	1	0	0	0	1	0	0	1	0	0	0	0	0	1	0	1	1	0	EC
21	7	23	2	0	0	1	1	0	0	0	1	0	0	1	1	1	0	1	0	0	0	0	0	1	0	0	1	0	EC
54	30	43	1	0	0	1	1	0	0	1	0	1	0	0	1	0	0	0	0	0	0	1	1	1	1	1	1	1	EC
26	16	55	2	1	0	1	1	0	0	0	0	1	0	0	1	0	0	1	0	0	0	0	0	1	0	0	1	0	EC
36	16	55	2	1	0	1	1	0	0	0	0	1	0	1	1	0	0	1	0	0	0	0	0	1	0	0	1	0	EC
30	3	35	1	1	0	1	0	0	1	1	0	0	1	0	0	0	0	1	0	0	0	0	0	1	0	1	0	0	EC
26	5	30	2	0	0	1	1	0	0	0	1	0	0	0	0	0	0	0	0	0	0	0	0	1	0	0	1	0	EC
25	7	18	2	0	0	0	1	0	0	0	1	0	0	0	0	0	0	1	0	0	0	0	0	0	0	0	0	0	EC
21	6	40	0	1	0	1	1	0	1	0	1	0	0	1	1	0	0	1	0	0	0	0	0	1	0	0	1	0	EC
25	14	35	2	0	0	1	1	0	0	1	0	0	1	0	0	0	0	1	0	0	0	0	1	1	1	1	1	0	EC
25	7	34	2	0	0	1	1	0	0	0	1	0	0	0	0	0	0	1	0	0	0	0	0	1	0	1	1	0	EC
72	8	10	2	0	0	0	1	0	0	0	1	0	0	0	0	0	0	0	0	0	0	0	0	1	0	0	1	0	EC
28	12	20	0	1	0	1	1	0	0	1	0	0	0	0	1	1	0	1	0	0	0	0	1	1	1	1	1	1	EC
24	7	45	2	0	0	0	1	0	0	0	1	0	0	0	1	0	0	1	0	0	0	0	0	1	0	0	1	0	EC
8	3	74	2	0	0	0	1	0	0	1	0	0	0	1	0	1	0	0	0	0	0	0	0	1	0	1	1	0	EC
33	9	42	2	0	0	1	1	0	0	0	1	0	0	1	1	1	0	1	0	0	0	0	0	1	0	0	0	0	EC
26	21	53	2	1	0	1	1	0	0	1	1	0	0	1	1	1	0	1	0	0	0	0	0	1	0	0	0	0	EC
25	11	53	2	1	0	1	1	0	0	0	1	0	0	1	1	1	0	1	0	0	0	0	0	1	0	0	0	0	EC
13	11	53	2	1	0	1	1	0	0	0	1	0	0	1	1	1	0	1	0	0	0	0	0	1	0	1	0	0	EC
39	14	47	0	1	0	1	1	0	1	1	1	0	0	0	1	0	0	1	0	0	0	0	0	1	0	0	0	0	EC
40	21	57	2	1	0	1	1	0	0	0	0	0	1	1	1	0	0	1	0	0	0	0	1	1	0	1	1	0	EC
126	3	54	2	1	1	1	1	0	0	0	1	0	0	1	0	0	0	1	0	0	0	0	0	1	0	0	1	0	EC
30	23	46	2	1	0	0	1	0	0	1	0	0	0	0	0	0	0	1	1	0	0	0	0	0	0	0	0	0	EC
20	12	61	2	0	0	0	1	0	0	1	0	1	0	0	0	0	0	1	0	0	1	0	1	1	0	1	1	0	EC
30	5	57	2	0	0	0	1	0	0	0	0	1	0	0	0	0	1	1	0	0	0	0	0	0	0	0	0	0	EC
21	15	32	2	0	0	0	1	0	0	1	0	0	1	0	0	0	0	1	0	0	0	0	0	1	0	0	1	0	EC
28	21	49	2	1	0	1	1	0	0	1	0	0	0	0	0	0	1	1	0	0	0	0	1	1	1	1	1	1	EC
9	5	34	2	0	0	1	0	0	0	0	0	0	1	0	0	0	0	1	0	0	0	0	0	1	0	0	0	0	EC
30	12	34	0	1	0	0	1	0	0	0	0	0	1	1	1	0	0	1	0	0	0	0	0	0	0	0	0	0	EC
27	15	60	2	1	1	1	1	0	1	0	0	0	1	0	0	0	0	1	0	0	0	0	1	1	1	1	1	1	EC
26	7	45	0	1	0	1	1	0	0	0	0	1	0	0	0	0	0	1	0	0	0	0	0	0	0	1	0	0	EC
28	7	56	2	1	1	0	1	0	1	1	1	0	0	1	1	1	0	1	0	0	0	0	0	1	0	0	1	0	EC
31	11	69	2	0	0	0	1	0	0	0	1	0	0	0	0	0	0	1	0	0	0	0	0	1	0	0	1	0	EC
22	8	46	2	0	0	1	1	0	0	0	1	0	0	0	0	0	0	1	0	0	0	0	0	1	0	0	0	0	EC
15	13	60	2	1	0	0	1	0	1	1	1	0	0	0	0	0	0	0	0	0	0	0	0	1	0	0	1	0	EC
24	13	34	2	1	1	0	1	0	0	0	1	0	0	0	1	0	0	1	0	0	0	0	0	1	0	0	1	0	EC
27	15	47	2	0	1	0	1	0	0	0	1	0	0	0	0	0	0	1	0	0	0	0	0	1	0	0	0	0	EC
30	23	52	2	0	0	1	1	0	0	1	0	1	0	1	1	0	0	1	0	0	0	0	1	1	1	1	1	1	EC
16	0	53	2	0	0	1	1	0	0	1	0	0	0	1	1	0	0	0	0	0	0	0	1	1	1	1	1	1	EC
43	23	1	2	0	0	1	1	0	0	0	1	0	0	0	1	0	0	1	0	0	0	0	0	1	0	0	1	0	EC
47	10	49	2	0	0	1	1	0	0	0	0	1	0	0	1	0	0	1	0	0	0	0	0	1	0	0	0	0	EC
24	9	66	2	0	0	1	1	0	0	0	1	0	0	0	0	0	0	1	0	0	0	0	0	1	0	0	1	0	EC
28	24	58	2	1	0	1	1	0	0	1	0	1	0	1	1	0	0	1	0	0	0	0	1	1	1	1	1	0	EC
25	12	54	2	1	0	1	1	0	0	0	0	0	1	0	0	0	0	0	0	0	0	0	1	1	1	1	1	0	EC
29	9	59	2	1	0	0	1	0	0	1	0	0	1	0	0	0	0	0	0	0	0	0	1	1	0	1	1	0	EC
43	16	4	2	0	0	0	1	0	0	1	1	0	0	0	0	0	0	1	0	0	0	0	0	1	0	0	1	0	EC
23	20	3	2	1	0	0	0	0	0	1	1	0	0	0	0	0	0	1	0	0	0	0	0	1	0	0	1	0	EC
30	9	47	0	0	0	0	1	1	0	1	0	1	0	0	0	0	0	1	1	0	0	0	1	0	1	0	0	0	KP
42	17	54	2	1	0	1	1	0	0	0	0	1	0	0	1	0	0	1	1	0	0	0	0	0	0	0	0	0	KP
103	0	43	0	1	0	0	1	1	0	1	0	1	0	0	1	0	0	1	0	0	0	0	0	0	0	0	0	0	KP
43	26	55	2	0	0	1	1	0	1	1	0	1	0	0	0	0	0	1	1	0	0	0	0	0	0	0	0	0	KP
216	50	63	1	1	0	1	1	0	1	0	1	0	0	0	0	0	0	1	1	0	0	0	1	1	0	0	1	0	KP
39	27	21	1	0	0	1	0	0	0	0	1	0	0	0	0	0	0	1	0	0	0	0	0	0	0	0	0	0	KP
39	25	21	1	0	0	1	0	0	0	0	1	0	0	0	1	0	0	0	0	0	0	0	0	0	0	0	0	0	KP
54	0	24	1	0	0	1	1	1	1	0	0	1	0	1	1	0	0	0	1	0	0	0	1	0	0	1	0	0	KP
22	19	19	0	1	0	0	1	0	0	1	1	0	0	0	1	0	0	1	0	0	0	0	0	1	0	0	1	0	KP
72	19	19	0	1	0	0	1	1	0	1	0	0	0	0	1	0	0	0	0	0	0	0	0	1	0	0	1	0	KP
33	26	55	1	0	1	1	1	0	0	0	0	1	0	0	1	0	0	1	1	0	0	1	1	1	0	0	1	0	KP
56	49	5	1	0	0	0	1	0	0	1	0	1	0	0	0	0	1	1	1	0	0	0	1	0	1	1	0	1	KP
44	43	8	1	0	0	0	1	0	0	0	0	1	0	0	0	0	0	1	1	0	0	0	0	1	0	0	0	0	KP
37	19	45	1	1	0	1	1	0	1	0	1	0	0	0	0	0	0	1	0	0	0	0	0	0	0	0	0	0	KP
28	0	14	0	0	0	1	1	0	0	0	1	0	0	1	1	0	0	1	0	0	0	0	0	1	0	0	1	0	KP
28	9	39	0	1	0	0	1	0	0	0	1	0	0	0	0	0	0	1	0	0	0	0	0	0	0	0	0	0	KP
23	18	54	1	0	0	1	1	0	0	0	1	0	0	0	0	0	0	1	0	0	0	0	0	0	0	0	0	0	KP
20	4	32	0	0	0	1	1	0	0	0	1	0	0	0	0	0	0	1	0	0	0	0	0	0	0	1	0	0	KP
40	15	11	0	1	0	1	1	0	0	0	1	0	0	0	0	0	0	1	1	0	0	0	0	0	0	0	0	0	KP
16	0	40	0	1	0	1	1	1	0	1	0	1	0	0	1	1	0	0	0	0	0	0	0	1	0	1	1	0	KP
28	25	53	1	0	0	1	1	0	0	0	0	0	0	0	1	0	0	1	1	0	0	0	0	0	0	0	0	0	KP
31	16	6	0	1	0	0	1	0	0	0	1	0	0	0	1	0	0	1	0	0	0	0	0	1	0	0	1	0	KP
27	16	12	0	1	0	1	1	0	0	0	1	0	0	0	0	0	0	1	0	0	0	0	0	0	0	0	0	0	KP
42	23	7	0	0	0	1	1	0	0	0	0	0	0	0	0	0	0	1	0	0	0	0	0	0	0	0	0	0	KP
43	16	43	0	0	0	1	1	0	0	0	1	0	0	0	1	1	0	1	1	0	0	0	0	1	0	1	0	0	KP
35	27	43	0	1	0	1	1	0	0	0	1	0	0	0	1	0	0	1	0	0	0	0	0	0	0	0	0	0	KP
56	89	51	1	0	0	1	1	0	1	0	1	0	0	0	1	0	0	0	1	0	0	0	0	0	0	0	0	0	KP
21	14	32	0	1	0	0	1	0	0	0	0	1	0	0	0	0	0	1	0	1	0	0	0	0	0	0	0	0	KP
24	17	28	1	1	0	1	1	1	0	0	0	0	0	0	1	0	0	1	0	1	0	0	0	1	0	1	1	0	KP
119	60	50	1	1	0	1	1	0	0	1	1	0	0	0	1	1	0	0	1	0	0	0	0	0	0	0	0	0	KP
119	60	50	1	1	0	1	0	0	0	1	1	0	0	0	1	1	0	0	1	0	0	0	0	0	0	0	0	0	KP
36	23	32	0	0	0	0	1	0	0	0	0	0	0	0	1	0	0	1	0	0	0	0	0	0	0	0	0	0	KP
43	3	69	1	1	0	1	0	0	1	0	1	0	0	0	1	0	0	1	1	0	0	0	0	0	0	0	0	0	KP
32	4	18	1	0	0	0	1	0	0	1	0	0	1	0	1	0	0	1	1	1	0	0	0	0	0	1	0	0	KP
28	12	54	0	0	1	1	1	1	1	1	0	0	0	1	1	0	0	1	1	0	0	0	1	0	1	1	0	1	KP
25	15	47	1	1	0	0	1	0	0	0	0	1	0	0	1	0	0	0	0	0	0	0	0	0	0	0	0	0	KP
35	5	15	0	0	0	0	1	0	0	0	1	0	0	0	1	0	0	0	1	0	0	0	0	0	0	0	0	0	KP
58	5	51	0	0	0	1	1	1	0	0	1	0	0	0	0	0	0	1	0	0	0	0	0	0	0	0	0	0	KP
20	8	10	0	1	0	1	1	0	0	0	1	0	0	0	1	0	0	0	0	0	0	0	0	0	0	0	0	0	KP
52	11	8	0	1	0	0	1	0	0	0	1	0	0	0	0	0	0	1	0	0	0	0	0	1	0	0	0	0	KP
24	9	45	0	1	0	1	1	0	0	0	1	0	0	1	0	0	0	1	0	0	0	0	0	0	0	0	0	0	KP
23	20	47	1	0	0	1	1	0	0	0	0	0	0	0	0	0	0	1	1	0	0	1	0	0	0	0	0	0	KP
33	14	3	0	1	0	0	1	0	0	0	0	1	0	0	0	0	0	1	1	0	0	0	1	0	0	0	0	0	KP
30	8	25	0	0	0	1	1	0	0	0	1	0	0	0	0	0	0	1	0	0	0	0	1	1	1	1	1	1	KP
21	26	31	2	0	0	1	1	0	0	0	0	1	0	0	1	0	0	1	1	0	1	0	1	0	1	1	0	1	KP
39	22	44	0	0	0	0	1	0	0	0	0	1	0	0	1	0	0	1	1	0	0	0	0	0	0	0	0	0	KP
109	40	52	1	0	0	1	1	1	0	0	1	0	0	0	1	0	0	1	0	1	0	0	0	1	0	0	1	0	KP
21	5	52	0	1	0	1	1	0	0	0	1	0	0	0	0	0	0	1	0	0	0	0	0	0	0	0	0	0	KP
34	0	52	1	0	0	1	1	0	0	0	0	1	0	0	0	0	0	1	1	0	0	0	0	0	0	0	0	0	KP
26	10	30	0	0	0	0	1	0	0	0	1	0	0	0	1	0	0	1	0	0	0	0	0	0	0	0	0	0	KP
40	27	12	1	1	0	0	1	0	0	0	1	0	0	0	0	0	0	0	0	0	0	0	0	1	0	0	1	0	KP
56	15	18	1	0	0	0	1	0	0	0	0	0	1	0	1	0	0	0	0	0	0	0	0	0	0	0	0	0	KP
21	0	54	1	0	0	0	1	0	0	0	0	0	0	0	0	0	0	0	1	0	0	0	0	0	0	0	0	0	KP
33	15	1	1	0	0	1	1	0	0	0	1	0	0	0	1	0	0	1	0	0	0	0	0	1	0	0	1	0	KP
33	0	42	0	1	0	0	1	0	0	0	0	1	0	0	0	1	0	0	1	0	0	0	0	0	0	0	0	0	KP
27	8	42	0	1	0	0	1	0	0	0	0	0	1	0	0	1	0	1	0	1	0	0	0	0	0	0	0	0	KP
34	6	53	0	0	0	1	1	0	1	0	1	0	0	0	0	0	0	1	1	0	0	0	0	0	0	0	0	0	KP
25	15	53	1	0	0	1	1	0	0	0	1	0	0	0	1	0	1	1	0	0	0	0	0	0	0	0	0	0	KP
28	20	60	2	1	0	0	1	0	0	0	1	0	0	0	0	0	0	1	0	0	0	0	0	0	0	0	0	0	KP
29	0	36	2	0	0	1	1	0	0	0	0	0	0	0	1	0	0	1	1	0	0	0	0	0	0	0	0	0	KP
21	10	29	0	0	0	1	1	0	0	0	1	0	0	0	0	0	0	0	0	0	0	0	0	0	0	0	0	0	KP
22	7	12	0	1	0	0	1	0	0	0	0	0	0	0	0	0	0	1	0	0	0	0	0	0	0	0	0	0	KP
34	21	44	2	1	0	1	1	0	0	0	0	0	1	0	0	0	0	1	0	0	0	0	0	0	0	0	0	0	KP
22	6	53	1	1	1	1	1	0	1	0	0	0	0	0	0	0	0	1	1	0	0	0	1	1	0	1	1	0	KP
23	5	16	0	1	0	1	1	0	0	0	0	0	1	0	0	0	0	1	0	0	0	0	0	0	0	0	0	0	KP
40	23	41	0	0	0	1	1	0	0	0	1	0	0	0	1	0	0	1	0	0	1	0	0	0	0	0	0	0	KP
70	16	42	0	0	0	1	1	0	0	0	0	1	0	0	0	0	0	1	1	0	1	0	0	0	0	0	0	0	KP
42	5	54	0	1	0	1	1	0	0	0	0	1	0	0	1	0	0	1	1	0	1	0	0	0	0	0	0	0	KP
33	30	54	2	1	0	0	1	0	0	0	0	0	0	0	0	0	0	0	1	0	0	0	0	0	0	0	0	0	KP
33	31	54	2	1	0	0	1	0	0	0	0	1	0	0	0	0	0	0	1	0	0	0	0	0	0	0	0	0	KP
20	5	54	0	1	0	0	1	0	0	0	0	0	1	0	0	0	0	1	1	1	0	0	0	0	0	0	0	0	KP
23	8	55	0	1	0	0	1	0	0	0	0	0	1	0	0	0	0	1	0	1	0	0	0	0	0	0	0	0	KP
21	5	56	0	1	0	1	1	0	0	0	1	0	0	0	0	0	0	1	1	0	0	0	0	0	0	0	0	0	KP
21	12	57	1	1	0	1	1	0	0	0	1	0	0	0	0	0	0	0	0	0	0	0	0	0	0	0	0	0	KP
161	2	64	1	0	0	1	1	0	0	1	1	0	0	0	0	1	0	1	1	1	0	0	0	0	0	0	0	0	KP
31	6	38	0	0	0	0	1	0	0	0	1	0	0	1	1	0	0	0	0	1	0	0	0	0	0	0	0	0	KP
24	7	49	0	0	0	1	1	0	0	0	1	0	0	0	0	0	0	1	0	0	0	0	0	1	0	1	1	0	KP
25	9	36	0	0	0	1	1	0	0	0	0	0	1	0	1	0	0	1	0	1	0	0	0	0	0	0	0	0	KP
44	18	22	0	0	0	0	1	0	0	1	0	0	1	0	0	0	0	1	0	1	0	0	0	0	0	0	0	0	KP
30	12	49	0	1	0	1	1	0	0	0	0	1	0	0	1	0	0	1	1	0	0	0	0	0	0	0	0	0	KP
46	16	2	2	0	0	0	1	0	0	0	1	0	0	0	0	0	0	0	0	0	0	0	0	0	0	0	0	0	KP
28	8	36	0	0	0	1	1	0	0	0	0	1	0	0	0	0	0	1	1	0	0	0	0	0	0	0	0	0	KP
27	0	26	0	0	0	0	1	0	0	0	0	0	0	0	0	0	0	1	0	0	0	0	0	0	0	0	0	0	KP
73	65	8	1	0	0	0	1	0	0	0	1	0	0	0	1	0	0	1	0	0	0	0	0	1	0	0	0	0	KP
27	11	16	0	0	0	1	1	0	0	0	0	0	0	0	0	0	0	1	0	0	0	0	0	0	0	0	0	0	KP
33	14	36	0	0	0	1	1	0	0	0	0	0	0	1	1	0	0	1	0	1	0	0	0	0	0	0	0	0	KP
32	25	14	2	1	0	0	1	0	0	0	1	0	0	0	0	0	0	1	0	0	0	0	0	1	0	0	0	0	KP
26	10	11	0	1	0	1	1	0	0	0	1	0	0	0	0	0	0	1	0	0	0	0	0	0	0	0	0	0	KP
87	6	14	0	1	0	0	1	0	1	0	0	1	0	0	0	0	0	1	1	0	0	0	0	1	0	0	1	0	KP
30	23	27	2	1	0	0	1	0	0	1	0	0	0	1	0	0	0	1	0	0	1	0	1	0	1	0	0	1	KP
37	17	57	0	1	0	0	1	0	0	0	1	0	0	0	0	0	0	1	0	0	0	0	0	0	0	0	0	0	KP
26	12	25	0	1	0	1	1	1	0	0	0	0	1	0	0	0	0	1	0	1	0	0	0	0	0	0	0	0	KP
25	10	22	0	1	0	1	1	0	0	0	1	0	0	0	1	0	0	1	0	0	0	0	0	0	0	0	0	0	KP
24	17	62	0	1	0	1	1	0	1	1	0	1	0	0	1	0	0	1	1	1	0	0	0	0	0	0	0	0	KP
19	9	62	0	1	0	1	1	0	1	0	1	0	0	0	1	0	0	0	0	0	0	0	0	0	0	0	0	0	KP
26	0	19	0	0	0	0	1	0	0	1	1	0	0	0	1	0	0	0	0	0	0	0	0	1	0	1	1	0	KP
32	3	64	0	0	0	1	1	0	0	0	1	0	0	0	0	0	0	1	1	0	0	0	0	0	0	0	0	0	KP
22	9	8	0	0	0	1	1	0	0	0	1	0	0	0	1	0	0	1	0	0	0	0	0	0	0	0	0	0	KP
46	9	20	0	1	0	0	1	1	0	1	1	0	0	0	1	0	0	0	0	0	0	0	0	0	0	0	0	0	KP
3	5	66	2	1	0	1	1	0	0	1	0	1	0	0	1	0	0	1	1	0	0	1	0	0	0	0	0	0	KP
24	9	48	0	1	0	1	1	0	0	1	0	0	1	1	1	0	0	0	0	1	0	0	0	0	0	0	0	0	KP
23	0	19	0	0	0	0	1	0	0	0	0	0	0	0	0	0	0	1	0	1	0	0	0	0	0	0	0	0	KP
22	7	19	0	0	0	0	1	0	0	0	0	0	1	0	0	0	0	1	0	1	0	0	0	0	0	0	0	0	KP
31	9	19	0	0	0	0	1	0	0	0	0	0	0	0	0	0	0	1	1	1	1	0	0	0	0	0	0	0	KP
28	9	19	0	0	0	0	1	0	0	1	1	0	0	0	0	0	0	0	0	0	0	0	0	0	0	0	0	0	KP
43	14	8	0	0	0	0	1	0	0	1	1	0	0	0	0	0	0	1	0	0	0	0	0	0	0	0	0	0	KP
10	7	49	0	1	0	1	1	0	0	0	0	0	1	0	1	0	0	1	0	1	0	0	0	1	0	1	1	0	KP
56	5	33	0	1	0	1	1	0	0	0	1	0	0	0	0	0	0	1	0	1	0	0	0	0	0	0	0	0	KP
56	8	33	0	1	0	1	1	0	0	0	0	0	1	0	1	0	0	1	0	1	0	0	0	0	0	0	0	0	KP
23	12	52	1	1	0	1	1	0	0	0	0	1	0	0	0	0	0	0	1	0	0	1	1	0	0	1	0	0	KP
67	20	18	1	0	1	1	1	1	0	1	1	0	1	0	1	0	1	0	0	1	0	0	1	0	1	1	0	1	KP
28	14	13	0	0	0	1	1	0	0	0	1	0	0	0	1	0	0	1	0	0	0	0	0	0	0	0	0	0	KP
53	32	51	0	1	0	1	1	0	0	1	0	0	0	0	1	0	1	1	1	0	0	0	0	0	0	0	0	0	KP
77	11	34	1	0	0	0	1	0	0	1	0	1	0	0	0	0	0	0	1	0	1	0	0	0	0	0	0	0	KP
155	37	42	1	1	0	1	1	0	0	0	1	0	0	0	0	0	0	1	0	0	0	0	0	0	0	0	0	0	KP
155	37	42	1	1	0	1	1	0	0	0	1	0	0	0	1	0	0	1	0	0	0	0	0	0	0	0	0	0	KP
27	16	25	0	1	1	1	1	1	0	1	0	0	0	1	1	0	0	1	0	1	0	0	1	0	1	1	0	1	KP
30	17	49	1	0	0	1	1	0	0	0	1	0	0	0	0	0	0	1	0	0	0	0	0	0	0	0	0	0	KP
44	16	54	1	1	0	1	1	0	0	1	0	0	1	0	1	0	0	1	1	0	0	0	0	0	0	0	0	0	KP
32	9	63	0	0	0	1	1	0	0	0	0	1	0	0	0	0	0	1	1	0	0	0	0	0	0	0	0	0	KP
23	7	64	0	0	0	1	1	0	0	0	0	1	0	0	1	0	0	1	1	0	0	0	0	0	0	0	0	0	KP
22	5	30	0	1	0	0	1	0	0	0	0	0	1	0	0	0	0	1	0	1	0	0	0	0	0	0	0	0	KP
31	2	31	0	0	0	0	1	0	0	1	0	1	0	0	1	0	0	0	1	0	0	0	0	0	0	0	0	0	KP
27	6	27	0	0	0	0	1	0	0	0	1	0	0	0	0	0	0	1	0	1	0	0	0	0	0	0	0	0	KP
24	22	45	2	0	0	1	1	0	0	0	0	1	0	0	0	0	0	1	1	0	0	1	0	0	0	0	0	0	KP
22	9	49	1	1	0	1	1	0	0	0	0	0	0	0	0	0	0	1	0	0	0	0	0	0	0	0	0	0	KP
53	47	42	1	1	0	1	1	0	0	1	0	0	0	0	0	0	0	1	1	0	0	1	0	0	0	0	0	0	KP
29	23	56	0	0	0	0	1	1	0	1	0	0	0	0	0	0	0	1	0	0	0	0	1	1	1	1	1	0	KP
40	18	41	0	1	0	1	1	0	0	0	1	0	0	0	1	0	0	1	1	0	0	0	0	0	0	0	0	0	KP
29	21	57	0	1	1	0	1	1	1	1	0	0	1	0	1	0	0	1	1	1	0	0	1	1	1	1	1	1	KP
36	0	49	1	1	0	1	1	0	0	1	0	0	0	0	1	0	0	1	1	1	0	0	1	1	1	1	1	1	KP
32	5	46	0	0	0	0	1	0	0	0	0	0	0	0	0	0	0	1	0	0	0	0	0	0	0	0	0	0	KP
28	12	52	2	1	0	0	1	0	0	0	0	0	0	0	0	0	0	1	0	0	0	0	0	0	0	0	0	0	KP
43	15	16	0	1	0	0	1	1	0	0	1	0	0	0	1	0	0	1	0	0	0	0	0	1	0	0	1	0	KP
22	7	41	0	1	0	0	1	0	0	0	0	0	1	0	1	1	0	1	0	1	0	0	0	0	0	0	0	0	KP
28	9	25	2	0	0	0	1	0	0	0	1	0	0	0	0	0	0	0	0	0	0	0	0	0	0	0	0	0	KP
21	5	16	0	1	0	0	1	0	0	0	1	0	0	0	0	0	0	1	0	0	0	0	0	0	0	0	0	0	KP
21	8	17	0	1	0	0	1	0	0	0	1	0	0	0	0	0	0	0	0	0	0	0	0	1	0	0	1	0	KP
28	16	46	0	1	0	1	1	0	0	0	1	0	0	0	0	0	0	0	0	0	0	0	1	0	1	1	0	0	KP
30	10	52	0	0	0	0	1	0	0	0	0	1	0	0	1	0	0	1	1	0	0	0	0	0	0	0	0	0	KP
28	0	61	0	0	0	1	1	0	0	0	0	1	0	0	0	0	0	1	1	0	0	0	0	1	0	0	1	0	KP
46	13	13	0	1	0	0	1	0	0	0	0	0	0	0	1	0	0	0	0	0	0	0	1	1	0	1	1	0	KP
35	16	12	0	0	0	1	1	0	0	1	0	0	0	1	1	0	0	1	0	0	0	0	0	0	0	0	0	0	KP
44	10	32	0	1	0	0	1	0	0	1	0	0	0	0	1	0	0	0	1	1	0	0	0	1	0	0	1	0	KP
32	8	41	0	0	0	1	1	0	0	0	0	0	1	0	0	0	0	1	1	0	0	0	0	0	0	0	0	0	KP
33	5	51	0	0	0	1	1	0	0	0	0	0	0	1	1	1	0	1	0	0	0	0	0	0	0	0	0	0	KP
26	12	3	0	1	0	1	1	0	0	0	1	0	0	1	1	0	0	1	0	0	0	0	0	1	0	0	0	0	KP
27	7	46	2	1	0	0	1	0	0	1	1	0	0	0	0	0	0	0	0	0	0	0	0	0	0	0	0	0	KP
29	12	46	0	0	0	0	1	0	0	0	0	1	0	0	1	0	0	1	1	0	0	0	0	0	0	0	0	0	KP
53	40	3	1	1	0	0	1	0	0	0	1	0	0	0	1	0	0	0	0	0	0	0	0	0	0	0	0	0	KP
61	0	38	1	1	0	0	1	0	0	0	1	0	0	1	0	0	0	1	1	0	0	0	0	0	0	0	0	0	KP
48	3	38	0	1	0	0	1	0	0	0	1	0	0	1	1	1	0	1	1	0	0	0	0	1	0	0	0	0	KP
28	11	21	0	0	0	0	1	0	0	0	0	0	0	0	1	0	0	1	0	0	0	0	0	0	0	0	0	0	KP
34	20	56	2	0	0	0	1	0	0	0	0	1	0	0	0	0	0	1	1	0	0	0	0	0	0	0	0	0	KP
25	5	30	0	1	0	0	1	0	0	0	0	1	0	0	1	0	0	0	0	0	0	0	0	0	0	0	0	0	KP
28	15	9	0	0	0	1	1	0	0	0	1	0	0	0	0	0	0	0	0	0	0	0	0	0	0	0	0	0	KP
24	7	9	0	0	0	1	1	0	0	0	1	0	0	0	0	0	0	0	0	0	0	0	0	0	0	0	0	0	KP
27	15	10	0	0	0	1	1	0	0	0	1	0	0	0	1	0	0	1	0	0	0	0	0	0	0	0	0	0	KP
20	0	31	0	0	0	1	1	0	0	0	1	0	0	0	0	0	0	1	0	0	0	0	0	0	0	0	0	0	KP
43	0	44	0	0	0	0	0	1	0	1	0	0	0	0	1	0	0	0	1	0	0	0	0	0	0	0	0	0	KP
22	11	18	0	1	0	1	1	0	0	0	1	0	0	0	0	0	0	0	0	0	1	0	0	0	0	0	0	0	KP
23	7	18	0	1	0	1	1	0	0	0	1	0	0	0	1	0	0	1	0	1	0	0	0	0	0	0	0	0	KP
28	15	83	1	0	0	1	0	0	0	1	0	1	0	0	1	0	0	0	1	0	0	1	0	0	0	0	0	0	KP
182	0	40	1	0	0	1	1	1	1	0	1	0	0	1	1	0	0	1	1	0	0	0	0	0	0	0	0	0	KP
26	11	38	2	1	0	0	1	0	0	0	1	0	0	0	0	0	0	1	0	0	0	0	0	0	0	0	0	0	KP
27	10	45	0	0	0	1	1	0	0	0	1	0	0	1	1	0	0	0	0	0	1	0	0	0	0	0	0	0	KP
27	8	11	0	1	0	1	1	0	0	0	1	0	0	0	1	0	0	0	0	0	0	0	0	0	0	0	0	0	KP
32	8	11	0	1	0	1	1	0	0	0	0	1	0	0	1	0	0	1	1	0	0	0	0	0	0	0	0	0	KP
12	7	39	2	0	0	1	1	0	1	0	0	0	0	0	0	0	0	1	1	0	1	1	1	1	1	1	1	1	KP
26	14	64	0	0	0	1	1	0	0	0	0	0	0	0	1	0	0	1	1	0	0	0	0	0	0	0	0	0	KP
34	5	52	0	1	0	1	1	1	0	1	0	0	0	0	1	0	0	0	0	0	0	0	0	0	0	0	0	0	KP
29	6	26	0	1	0	1	1	0	0	0	0	0	0	0	0	1	0	1	0	0	0	0	0	0	0	0	0	0	KP
40	23	43	0	1	0	1	1	0	0	0	1	0	0	1	1	0	0	0	0	0	0	0	0	1	0	0	1	0	KP
21	9	51	0	1	0	1	1	0	0	0	1	0	0	0	1	0	0	1	0	0	0	0	0	0	0	0	0	0	KP
21	6	51	0	1	0	1	1	0	0	0	1	0	0	0	1	0	0	1	0	0	0	0	0	0	0	0	0	0	KP
29	15	28	0	1	0	1	1	0	0	0	0	1	0	0	0	0	0	1	0	0	0	0	0	0	0	0	0	0	KP
25	4	50	0	1	0	1	1	0	0	0	0	1	0	0	0	0	0	1	1	0	0	0	0	1	0	0	1	0	KP
19	16	43	2	0	0	1	1	0	0	0	0	0	1	0	0	0	0	1	0	1	0	0	0	0	0	0	0	0	KP
16	9	55	2	1	0	0	1	0	0	0	0	1	0	0	0	0	0	1	1	0	1	1	1	1	1	1	1	1	KP
6	0	49	2	1	0	1	1	0	1	1	0	1	0	0	1	0	0	1	1	0	0	1	1	1	1	1	1	1	KP
37	4	23	0	1	0	0	1	0	0	0	0	0	0	0	1	1	0	1	0	0	0	0	0	0	0	0	0	0	KP
45	0	24	0	1	0	0	1	0	0	0	1	0	0	0	1	0	0	1	0	0	0	0	0	1	0	1	1	0	KP
27	13	48	0	1	0	1	1	0	1	0	0	1	0	0	1	0	0	1	1	0	0	0	0	0	0	0	0	0	KP
35	12	40	1	0	0	0	1	0	0	0	1	0	0	0	0	0	0	0	0	0	0	0	0	0	0	0	0	0	KP
32	19	55	0	0	0	1	1	0	1	0	0	1	0	1	0	0	0	1	1	0	0	0	1	1	0	0	1	0	KP
29	21	48	1	0	1	1	1	0	0	1	0	0	1	1	0	0	0	1	1	1	0	0	1	1	1	1	1	1	KP
19	14	63	2	1	0	0	1	0	0	0	1	0	0	0	0	0	0	0	1	0	0	0	0	0	0	0	0	0	KP
8	6	24	0	1	0	1	0	0	0	0	1	0	0	0	0	0	0	1	1	0	0	0	0	0	0	1	0	0	KP
24	13	41	2	0	0	1	1	0	0	0	1	0	0	0	0	0	0	1	0	0	0	0	1	1	1	1	1	1	KP
31	13	41	2	1	0	0	1	0	0	0	1	0	0	0	0	0	0	1	0	1	0	0	0	0	0	0	0	0	KP
80	28	14	2	0	0	0	1	0	0	0	0	0	0	0	0	0	0	1	0	0	0	0	0	0	0	0	0	0	KP
26	12	51	0	0	0	1	1	1	1	1	0	0	0	0	1	0	0	1	1	0	0	0	0	1	0	0	1	0	KP
21	8	14	0	1	0	0	1	0	0	0	1	0	0	0	0	0	0	0	0	0	0	0	0	0	0	0	0	0	KP
70	0	56	0	0	0	1	1	0	1	0	1	0	0	0	1	0	0	0	1	0	0	0	0	0	0	0	0	0	KP
28	13	4	0	1	0	1	1	0	0	0	0	1	0	0	1	0	0	0	1	0	0	0	0	1	0	1	1	0	KP
22	12	58	1	0	0	1	1	0	0	1	0	1	0	0	0	0	0	0	1	0	0	0	0	0	0	0	0	0	KP
24	8	29	0	1	0	1	1	0	0	0	1	0	0	0	0	0	0	0	0	0	0	0	0	0	0	0	0	0	KP
22	6	8	0	1	0	1	1	0	0	0	1	0	0	0	1	0	0	1	0	0	0	0	0	0	0	0	0	0	KP
23	10	13	0	1	0	1	1	0	0	0	1	0	0	0	1	0	0	1	0	0	0	0	0	0	0	0	0	0	KP
77	7	28	0	1	1	1	1	0	0	0	0	0	1	0	1	1	0	1	0	1	0	0	0	1	0	0	1	0	KP
24	9	1	0	1	0	1	1	0	0	1	0	0	0	0	1	0	0	1	1	0	0	0	0	0	0	0	0	0	KP
32	30	34	2	0	0	1	1	0	0	1	1	0	0	0	1	0	1	0	0	0	1	0	1	1	1	1	1	1	KP
9	6	35	0	0	0	1	1	0	0	0	0	0	1	1	0	0	0	1	1	0	0	0	0	0	0	0	0	0	KP
44	5	28	0	1	0	0	1	0	0	0	1	0	0	0	1	0	0	1	0	0	0	0	0	0	0	0	0	0	KP
25	21	54	1	0	0	1	1	0	0	0	0	1	0	0	0	0	0	1	1	0	0	0	0	0	0	0	0	0	KP
32	10	27	2	1	0	0	1	0	0	0	1	0	0	0	0	0	0	1	0	0	0	0	0	0	0	0	0	0	KP
90	0	38	0	0	0	1	1	1	0	0	1	0	0	0	1	1	0	0	1	0	0	0	0	1	0	0	1	0	KP
27	9	51	0	0	0	0	1	0	0	0	1	0	0	0	0	0	0	0	0	0	0	0	0	0	0	0	0	0	KP
29	14	51	0	0	0	0	1	0	0	1	1	0	0	0	0	0	0	0	1	0	0	0	0	0	0	0	0	0	KP
31	20	49	2	1	0	1	1	0	1	0	0	1	0	0	0	0	0	1	1	0	0	0	0	0	0	1	0	0	KP
25	5	37	0	0	0	1	1	0	0	0	1	0	0	0	0	0	0	1	0	0	0	0	0	0	0	0	0	0	KP
29	7	37	0	0	0	1	1	0	0	0	1	0	0	0	1	0	0	1	0	0	0	0	0	0	0	0	0	0	KP
35	7	20	1	1	0	0	1	0	0	0	0	1	0	0	0	0	0	1	1	0	0	0	0	0	0	0	0	0	KP
7	4	46	0	1	0	1	1	0	0	0	0	1	0	1	0	0	0	0	1	0	0	0	0	0	0	0	0	0	KP
7	0	20	0	0	0	1	1	0	0	0	1	0	0	0	0	0	0	1	0	0	0	0	0	0	0	0	0	0	KP
11	7	50	0	1	0	1	1	0	0	0	1	0	0	0	1	0	0	1	0	0	1	0	0	0	0	0	0	0	KP
9	6	38	0	1	0	1	0	0	0	0	0	1	0	0	0	0	0	1	1	0	0	0	0	0	0	0	0	0	KP
36	7	41	2	0	0	0	1	0	0	1	0	0	0	0	0	0	0	0	0	0	0	0	0	0	0	0	0	0	KP
24	4	41	0	0	0	0	1	0	0	1	1	0	0	0	1	0	0	0	0	0	0	0	0	0	0	0	0	0	KP
52	19	31	0	1	0	0	1	0	0	1	0	0	0	0	1	0	0	1	0	0	1	0	0	0	0	0	0	0	KP
59	4	46	0	1	0	0	1	0	1	1	0	1	0	1	1	1	0	0	1	0	0	0	0	0	0	0	0	0	KP
21	4	59	0	0	0	1	1	0	0	0	1	0	0	1	1	0	0	1	0	0	0	0	0	0	0	0	0	0	KP
21	8	57	1	0	0	0	1	0	0	1	1	0	0	0	0	0	0	1	0	0	0	0	0	0	0	0	0	0	KP
49	34	14	1	0	0	1	1	0	0	1	1	0	0	0	1	0	0	0	1	0	0	0	0	0	0	0	0	0	KP
50	0	51	0	0	0	1	0	1	1	1	1	0	0	1	1	0	0	1	1	0	0	0	0	0	0	0	0	0	KP
22	9	40	0	1	0	1	1	0	1	0	1	0	0	0	0	0	0	1	0	0	0	0	0	0	0	0	0	0	KP
19	10	23	0	1	0	1	1	0	0	0	1	0	0	0	0	0	0	0	0	0	0	0	0	0	0	0	0	0	KP
27	11	5	0	0	0	1	1	0	0	0	1	0	0	0	1	0	0	0	0	0	0	0	0	0	0	0	0	0	KP
37	37	49	1	1	0	1	1	0	1	0	0	0	1	0	1	0	0	1	1	1	0	0	0	0	0	0	0	0	KP
28	11	14	0	0	0	1	1	0	0	0	1	0	0	0	1	0	0	1	0	0	0	0	0	0	0	0	0	0	KP
35	19	14	0	0	0	1	1	0	0	0	1	0	0	0	1	0	0	0	0	0	0	0	0	0	0	0	0	0	KP
22	9	53	0	0	0	0	1	0	0	1	0	0	1	0	0	0	0	0	1	0	0	0	0	0	0	0	0	0	KP
27	9	53	0	0	0	0	1	0	0	1	1	0	0	0	0	1	0	1	0	1	1	0	1	1	1	0	1	0	KP
68	11	17	0	0	0	1	1	1	0	0	1	0	0	0	1	0	0	1	0	0	0	0	0	0	0	0	0	0	KP
38	12	47	1	1	0	0	1	0	0	0	1	0	0	0	0	0	0	0	0	0	0	0	0	0	0	0	0	0	KP
30	0	49	0	1	0	1	1	0	0	0	1	0	0	0	1	0	0	1	1	0	0	0	0	0	0	0	0	0	KP
23	6	27	2	1	0	1	1	0	0	0	1	0	0	0	0	0	0	1	1	1	0	0	0	1	0	0	1	0	KP
24	0	32	0	1	0	1	1	0	0	0	1	0	0	0	1	0	0	1	0	0	0	0	0	0	0	0	0	0	KP
23	0	30	0	0	0	1	1	0	0	0	0	0	0	0	1	0	0	1	0	1	0	0	0	0	0	0	0	0	KP
33	21	11	0	0	0	1	1	0	0	0	0	0	0	0	0	0	0	1	0	0	0	0	0	0	0	0	0	0	KP
42	15	12	0	1	0	0	1	0	0	0	1	0	0	0	1	0	0	1	0	1	0	0	0	0	0	0	0	0	KP
10	0	54	1	1	0	1	0	0	0	0	1	0	0	1	1	0	0	0	1	0	0	0	0	1	0	0	1	0	KP
27	12	59	0	0	0	1	1	0	0	0	1	0	0	0	1	0	0	0	0	0	0	0	0	1	0	0	0	0	KP
21	13	2	0	0	0	1	1	0	0	1	0	0	0	0	0	0	1	0	0	0	0	1	1	1	1	1	1	1	KP
21	0	53	0	1	1	1	1	1	0	1	0	1	0	0	1	0	0	0	1	0	1	1	0	0	0	0	0	0	KP
30	14	29	1	0	0	1	1	0	0	0	1	0	0	0	1	0	0	1	0	0	0	0	0	0	0	0	0	0	KP
32	10	5	0	1	0	1	1	0	0	0	0	0	1	0	1	0	0	1	0	0	1	0	0	0	0	0	0	0	KP
25	11	29	0	0	0	1	1	0	0	0	1	0	0	0	1	0	0	1	1	0	0	0	0	0	0	0	0	0	KP
22	9	50	0	1	0	1	1	0	0	0	0	0	1	1	1	0	0	1	0	1	0	0	0	0	0	0	0	0	KP
18	2	24	0	1	0	1	1	0	0	0	1	0	0	0	1	0	0	0	0	0	0	0	0	0	0	0	0	0	KP
23	5	55	1	1	0	0	1	0	0	0	1	0	0	0	1	0	0	0	0	0	1	0	0	0	0	0	0	0	KP
42	8	24	0	1	0	0	1	0	0	0	1	0	0	0	1	0	0	0	0	0	0	0	0	0	0	0	0	0	KP
40	20	40	0	1	0	1	1	0	1	0	0	0	0	0	1	0	0	1	1	0	0	0	0	0	0	0	0	0	KP
21	11	40	0	1	0	1	1	1	1	0	0	0	0	1	0	1	0	1	1	0	0	0	0	0	0	0	0	0	KP
27	12	42	0	1	0	0	1	0	0	0	1	0	0	1	0	0	0	1	1	0	0	0	0	0	0	0	0	0	KP
35	24	51	1	0	0	1	1	0	0	0	1	0	0	0	0	0	0	1	0	0	0	0	0	1	0	0	1	0	KP
22	5	31	0	1	0	1	1	0	0	0	1	0	0	0	0	0	0	1	0	0	0	0	0	0	0	0	0	0	KP
64	15	30	1	0	0	1	1	0	0	0	0	0	1	1	0	0	0	0	0	0	0	0	0	0	0	0	0	0	KP
21	16	16	0	0	0	1	1	0	0	0	0	0	0	1	1	1	0	1	1	0	0	0	0	0	0	0	0	0	KP
26	16	2	0	1	0	1	1	0	0	0	1	0	0	0	1	0	0	1	0	0	0	0	0	1	0	0	1	0	KP
71	61	40	0	1	0	1	1	1	1	1	0	1	0	1	1	1	0	0	1	0	0	1	0	1	0	0	1	0	KP
26	6	8	0	1	0	0	1	0	0	0	1	0	0	0	0	0	0	0	0	0	0	0	0	1	0	0	1	0	KP
23	4	45	0	1	0	1	1	0	0	0	1	0	0	0	0	0	0	1	0	0	0	0	0	0	0	0	0	0	KP
19	8	3	0	1	0	1	1	0	0	0	1	0	0	0	0	0	0	0	0	0	0	0	0	1	0	0	1	0	KP
63	8	54	0	1	0	1	1	0	0	0	1	0	0	0	1	0	0	1	0	0	0	0	0	0	0	0	0	0	KP
52	18	19	0	0	0	0	1	0	0	0	1	0	0	0	1	1	0	1	1	0	0	0	0	0	0	0	0	0	KP
49	7	36	0	0	0	0	1	0	0	1	0	1	0	0	1	0	0	1	1	0	0	0	0	0	0	0	0	0	KP
42	12	37	0	1	0	0	1	0	0	1	0	0	0	0	0	0	0	0	1	0	0	0	0	0	0	0	0	0	KP
67	2	37	0	1	0	0	1	0	0	0	1	0	0	0	1	0	0	0	1	0	0	0	0	1	0	0	1	0	KP
30	20	50	0	1	0	0	1	1	0	1	1	0	0	0	1	0	0	1	1	0	0	0	0	0	0	0	0	0	KP
23	16	51	1	1	0	1	1	0	0	1	0	1	0	0	1	0	0	0	1	0	0	0	0	1	0	0	0	0	KP
33	4	47	1	0	0	0	1	0	1	0	1	0	0	0	1	0	0	1	0	0	0	0	0	0	0	0	0	0	KP
60	3	46	1	1	0	1	1	0	0	0	0	1	0	0	0	0	0	1	0	0	0	0	1	0	1	1	0	0	KP
78	14	48	0	0	0	1	1	1	0	1	0	0	1	0	1	1	0	1	0	1	0	0	0	0	0	0	0	0	KP
61	50	48	1	0	1	1	1	0	0	0	0	1	0	0	1	0	0	1	1	0	0	0	0	0	0	0	0	0	KP
20	5	33	0	0	0	1	1	0	0	0	1	0	0	0	0	0	0	0	0	0	0	0	0	0	0	0	0	0	KP
23	11	32	0	1	0	0	1	1	0	0	1	0	0	0	1	0	0	0	0	1	0	0	0	1	0	0	1	0	KP
32	8	63	0	1	0	1	1	0	0	0	0	0	1	0	0	0	0	1	0	1	0	0	0	1	0	0	1	0	KP
83	29	64	1	1	0	1	1	0	0	1	0	1	0	0	0	0	0	1	1	0	0	0	0	0	0	0	0	0	KP
96	11	44	1	1	0	1	1	0	0	1	1	0	0	0	0	0	0	0	1	0	0	0	0	1	0	1	1	0	KP
62	37	67	1	1	0	1	1	0	0	0	1	0	0	0	0	0	0	0	1	0	0	0	0	1	0	0	1	0	KP
20	2	15	0	1	0	0	1	0	0	0	1	0	0	0	0	0	0	1	0	0	0	0	0	1	0	0	1	0	KP
39	7	34	0	0	0	1	1	0	0	0	1	0	0	0	1	0	0	1	0	0	0	0	0	0	0	0	0	0	KP
20	10	65	0	0	0	1	1	0	0	0	1	0	0	0	1	0	0	0	0	0	0	0	1	0	0	1	0	0	KP
21	4	31	0	0	0	1	1	0	0	0	0	1	0	1	1	0	0	1	1	0	0	0	0	0	0	0	0	0	KP
29	17	6	0	1	0	0	1	0	0	0	1	0	0	0	1	0	0	1	0	0	0	0	0	0	0	0	0	0	KP
35	0	38	2	1	0	1	1	0	0	1	0	0	1	0	0	0	0	1	0	1	0	0	0	0	0	0	0	0	KP
30	12	48	0	1	0	0	1	0	0	0	1	0	0	0	1	0	0	1	1	0	0	0	0	0	0	0	0	0	KP
26	9	48	0	1	0	0	1	0	0	0	1	0	0	0	1	0	0	0	0	0	0	0	0	0	0	0	0	0	KP
33	8	14	0	1	0	1	1	0	0	0	0	0	0	0	0	0	0	0	0	0	0	0	0	0	0	0	0	0	KP
25	10	46	0	1	0	1	1	0	0	0	1	0	0	0	0	0	0	0	0	0	0	0	0	1	0	0	1	0	KP
34	24	49	0	0	0	0	1	0	1	0	1	0	0	0	0	0	0	1	0	0	0	0	0	0	0	0	0	0	KP
31	27	14	1	0	0	1	1	0	0	0	1	0	0	0	0	0	0	1	0	0	0	0	0	0	0	0	0	0	KP
38	13	35	1	1	0	1	1	1	0	1	0	0	1	0	1	0	0	0	0	1	0	0	0	1	0	1	1	0	KP
32	21	57	2	1	0	1	1	0	0	1	0	0	0	0	0	0	0	1	1	0	0	0	0	0	0	0	0	0	KP
34	12	20	0	1	0	1	1	1	0	1	0	0	0	0	1	0	0	1	0	0	0	0	1	1	0	1	1	0	KP
66	55	22	1	1	0	1	1	1	0	0	1	0	0	0	0	0	0	1	0	0	0	0	0	1	0	1	1	0	KP
41	16	50	2	1	0	0	1	0	1	1	1	0	0	0	0	0	0	1	1	0	0	0	0	0	0	0	0	0	KP
59	31	38	0	1	0	0	1	0	0	0	1	0	0	0	1	0	0	1	1	0	0	0	0	0	0	0	0	0	KP
23	8	58	2	0	0	0	1	0	0	0	0	0	0	0	0	0	0	1	0	0	0	0	1	1	1	1	1	1	KP
30	3	58	0	0	0	0	1	0	0	0	1	0	0	0	0	0	1	1	0	0	0	0	1	1	1	1	1	1	KP
23	7	51	0	1	0	0	1	0	0	1	1	0	0	0	1	0	0	0	1	0	0	0	0	0	0	0	0	0	KP
43	20	36	0	0	0	1	1	0	0	0	0	0	0	1	0	0	0	1	1	0	1	0	1	1	1	1	1	1	KP
43	20	36	0	0	0	1	1	0	0	0	0	0	0	1	1	0	0	1	1	0	1	0	1	1	1	1	1	1	KP
31	19	43	2	1	0	0	1	0	0	0	1	0	0	0	0	0	0	0	0	0	1	0	0	0	0	0	0	0	KP
28	7	56	0	0	0	1	1	0	1	0	0	1	0	1	1	1	0	0	0	0	0	0	1	1	1	0	1	0	KP
30	8	33	0	0	0	0	1	0	0	0	0	0	1	0	1	0	0	1	1	0	0	0	0	0	0	0	0	0	KP
20	9	33	0	0	0	0	1	0	0	0	1	0	0	0	1	0	0	1	0	0	0	0	0	0	0	0	0	0	KP
22	19	38	2	1	0	0	1	0	0	0	1	0	0	0	0	0	0	0	0	0	1	0	0	0	0	0	0	0	KP
38	14	37	0	1	0	0	1	0	0	1	0	1	0	0	0	0	0	1	1	1	0	0	0	1	0	0	1	0	KP
39	26	34	2	0	0	0	1	0	0	1	0	0	1	0	0	0	0	1	1	1	0	0	0	1	0	0	0	0	KP
27	8	16	1	0	0	0	1	0	0	1	1	0	0	0	1	0	0	1	0	0	0	0	0	0	0	0	0	0	KP
27	8	41	0	0	0	1	1	0	0	0	1	0	0	0	1	0	0	0	1	0	0	0	0	0	0	0	0	0	KP
28	5	39	2	1	0	0	1	0	0	0	1	0	0	0	0	0	0	0	0	0	0	0	0	0	0	0	0	0	KP
27	18	40	0	1	0	0	1	0	1	0	1	0	0	0	0	0	0	1	0	0	1	0	0	0	0	0	0	0	KP
13	6	40	1	1	0	0	1	1	1	1	1	0	0	0	1	0	0	0	0	0	1	0	0	0	0	0	0	0	KP
22	9	36	0	0	0	1	1	0	0	0	1	0	0	0	1	0	0	1	0	0	0	0	0	0	0	0	0	0	KP
32	0	38	1	1	0	1	1	0	0	0	0	0	1	0	1	0	0	1	0	1	0	0	0	1	0	1	1	0	KP
32	10	28	0	1	1	1	1	0	0	0	0	0	1	0	0	0	0	1	1	0	0	0	1	1	1	1	1	1	KP
33	24	15	0	0	0	1	1	0	0	0	0	0	1	0	1	0	0	0	0	1	0	0	0	1	0	0	0	0	KP
21	11	5	0	0	0	1	1	0	0	0	1	0	0	0	1	0	0	0	0	0	0	0	0	0	0	0	0	0	KP
34	24	31	1	1	0	1	1	0	1	1	0	1	0	0	0	0	0	1	1	0	0	0	0	0	0	0	0	0	KP
22	3	30	0	1	0	0	1	0	0	1	0	0	1	0	0	0	0	1	0	1	0	0	0	0	0	0	0	0	KP
29	4	21	0	0	0	0	1	0	0	0	1	0	0	0	0	0	0	0	0	0	0	0	0	0	0	0	0	0	KP
24	10	14	0	1	0	1	1	0	0	0	1	0	0	0	1	0	0	1	0	0	0	0	0	0	0	0	0	0	KP
23	12	59	1	0	0	1	1	0	1	0	1	0	0	0	0	0	0	1	0	0	0	0	0	0	0	0	0	0	KP
25	4	55	0	0	0	1	1	0	1	0	1	0	0	1	1	0	0	0	0	0	0	0	0	0	0	0	0	0	KP
26	6	15	0	1	0	0	1	0	0	1	1	0	0	0	1	1	0	1	1	0	0	0	0	0	0	0	0	0	KP
69	24	20	1	1	0	1	1	0	0	1	1	0	0	0	1	0	1	1	1	0	0	0	1	1	1	1	0	1	KP
29	17	19	0	1	0	0	1	0	0	1	0	0	1	0	1	1	0	0	0	1	0	0	0	0	0	0	0	0	KP
38	12	57	0	0	0	1	1	0	0	1	1	0	0	0	1	0	0	1	0	0	0	0	0	0	0	0	0	0	KP
29	15	27	0	0	0	0	1	0	0	1	0	0	0	1	1	1	0	1	1	0	0	0	0	0	0	0	0	0	KP
29	6	23	2	1	0	0	1	0	0	1	1	0	0	0	0	0	0	0	0	0	0	0	0	0	0	0	0	0	KP
43	43	27	1	0	0	1	0	0	0	0	0	1	0	0	0	1	0	1	1	1	0	0	1	1	0	0	1	0	KP
26	10	17	0	0	0	0	1	1	0	0	1	0	0	0	1	0	0	1	1	1	0	0	0	1	0	0	1	0	KP
21	0	17	0	0	0	0	0	1	0	1	0	1	0	0	1	0	0	1	1	0	0	1	0	0	0	0	0	0	KP
28	11	53	0	0	0	0	1	0	0	1	0	0	0	1	1	0	0	1	0	0	0	0	0	1	0	0	1	0	KP
49	20	17	1	0	0	0	1	0	0	0	1	0	0	0	0	0	0	1	1	0	0	0	0	0	0	0	0	0	KP
29	12	18	1	0	0	0	1	0	0	0	1	0	0	0	1	0	0	0	0	0	0	0	0	1	0	0	1	0	KP
29	10	63	0	0	0	1	1	0	0	0	1	0	0	0	0	0	0	1	0	0	0	0	0	1	0	0	1	0	KP
67	26	63	0	0	0	1	1	0	0	0	1	0	0	0	1	0	0	1	1	0	0	0	0	1	0	0	1	0	KP
24	2	36	0	1	0	0	1	0	0	1	1	0	0	0	0	0	0	1	0	0	0	0	0	0	0	0	0	0	KP
15	12	45	0	0	0	1	1	0	0	0	1	0	0	0	0	0	0	1	1	0	1	0	0	0	0	0	0	0	KP
21	4	14	0	1	0	1	1	0	0	0	1	0	0	1	1	0	0	0	0	0	0	0	0	0	0	0	0	0	KP
35	14	66	1	1	0	1	1	0	1	0	0	1	0	0	1	0	0	1	1	0	0	0	0	0	0	0	0	0	KP
42	42	52	2	1	0	1	1	0	1	0	0	1	0	1	1	0	0	1	1	0	0	1	0	1	0	0	1	0	KP
18	0	40	0	0	0	1	0	1	0	0	0	1	0	0	0	1	0	1	1	0	0	0	0	1	0	0	1	0	KP
21	6	27	0	0	0	1	1	0	0	0	1	0	0	0	0	0	0	0	0	0	0	0	0	0	0	0	0	0	KP
10	6	22	0	0	0	1	1	0	0	0	1	0	0	0	1	0	0	1	0	0	0	0	0	0	0	0	0	0	KP
26	10	7	0	0	0	1	1	0	0	0	1	0	0	0	1	0	0	0	0	0	0	0	0	0	0	0	0	0	KP
26	14	27	1	0	0	0	1	0	0	1	0	1	0	0	0	0	0	1	1	0	0	1	1	1	1	1	1	1	KP
26	3	63	2	0	0	1	1	0	0	1	0	1	0	0	1	0	0	1	1	0	0	0	0	0	0	0	0	0	KP
24	0	37	0	0	0	1	1	0	0	0	1	0	0	1	1	0	0	1	1	0	0	0	0	0	0	0	0	0	KP
23	7	21	0	0	0	0	1	0	0	0	1	0	0	0	0	0	0	1	0	0	0	0	0	0	0	0	0	0	KP
52	3	35	0	1	1	0	1	0	0	1	0	1	0	0	1	0	0	0	1	0	0	0	0	1	0	0	1	0	KP
27	8	36	0	1	1	0	1	1	0	0	1	0	0	1	1	0	0	1	1	1	0	0	1	1	1	1	1	1	KP
27	8	14	0	0	0	1	1	0	0	0	1	0	0	0	1	0	0	1	0	0	0	0	0	1	0	0	1	0	KP
24	10	39	0	1	0	0	1	0	0	0	1	0	0	0	1	0	0	1	1	1	0	0	0	0	0	0	0	0	KP
22	8	11	0	0	0	1	1	0	0	0	1	0	0	0	0	0	0	0	0	0	0	0	0	1	0	0	1	0	KP
23	15	25	1	1	0	1	1	0	0	0	0	0	0	0	1	1	0	0	0	0	0	0	0	0	0	0	0	0	KP
35	21	16	0	0	0	0	1	0	0	1	1	0	0	0	0	0	0	1	0	0	0	0	0	0	0	0	0	0	KP
53	10	46	1	1	0	0	1	0	0	1	1	0	0	0	0	0	0	1	0	0	0	0	0	0	0	0	0	0	KP
44	13	32	1	1	1	1	1	1	0	0	0	0	0	0	1	0	0	0	0	0	0	0	1	1	1	1	1	1	KP
66	26	44	1	1	0	1	0	0	0	0	1	0	0	1	1	0	0	0	0	0	0	0	0	1	0	0	0	0	KP
25	10	39	0	0	0	1	1	0	0	0	1	0	0	0	1	0	0	1	0	0	0	0	0	0	0	0	0	0	KP
22	3	28	0	1	0	0	1	0	0	0	0	1	0	0	1	0	0	1	1	0	0	0	0	0	0	0	0	0	KP
26	9	12	0	1	0	1	1	0	0	0	1	0	0	0	1	0	0	1	0	0	0	0	0	1	0	0	0	0	KP
25	10	35	0	1	0	1	1	0	0	0	1	0	0	0	1	0	0	0	0	0	0	0	0	0	0	0	0	0	KP
28	9	52	0	0	0	0	1	0	1	0	0	0	0	0	0	0	0	1	1	0	1	0	0	0	0	0	0	0	KP
25	16	27	1	0	0	1	1	0	0	0	0	0	0	1	1	0	0	1	0	0	0	0	0	0	0	0	0	0	KP
30	8	31	0	0	0	1	1	0	0	0	1	0	0	0	0	0	0	0	1	0	0	0	0	0	0	0	0	0	KP
56	14	12	2	0	0	0	1	0	0	0	1	0	0	0	0	0	0	1	0	0	0	0	1	1	1	1	1	0	KP
24	21	8	1	0	0	0	1	0	0	0	1	0	0	0	0	0	0	1	0	0	0	0	1	0	1	0	0	0	KP
33	14	31	2	0	1	1	1	0	0	1	0	1	0	0	0	0	0	1	1	0	0	0	1	0	1	1	0	1	KP
10	5	52	0	1	0	1	1	0	0	0	1	0	0	0	0	0	0	0	1	0	0	0	0	0	0	0	0	0	KP
50	24	32	2	1	1	1	0	0	0	0	0	1	0	0	1	0	0	0	1	1	0	0	1	0	1	1	0	1	KP
26	6	7	0	1	0	1	1	0	0	0	1	0	0	0	0	0	0	1	0	0	0	0	0	1	0	0	1	0	KP
12	8	30	0	1	0	1	1	0	0	0	1	0	0	0	1	0	0	1	0	0	0	0	0	1	0	0	0	0	KP
22	9	30	0	1	0	1	1	0	0	0	1	0	0	0	1	0	0	1	0	0	0	0	0	1	0	0	1	0	KP
35	10	51	0	0	0	1	1	0	1	0	1	0	0	1	1	0	0	1	1	0	0	0	0	0	0	0	0	0	KP
28	3	36	0	0	0	0	1	0	0	1	0	0	0	0	0	0	0	0	1	0	0	0	0	0	0	0	0	0	KP
23	5	56	1	0	0	0	1	0	0	1	1	0	0	0	0	0	0	1	0	0	0	0	0	0	0	0	0	0	KP
23	7	29	0	1	0	1	1	0	0	0	1	0	0	0	1	0	0	1	1	0	0	0	0	0	0	0	0	0	KP
24	9	16	0	1	0	0	1	0	0	0	1	0	0	0	0	0	0	0	0	0	0	0	0	0	0	0	0	0	KP
30	16	16	0	1	0	0	1	0	0	0	1	0	0	0	1	0	0	0	0	0	0	0	0	0	0	0	0	0	KP
27	7	49	0	1	0	1	1	0	0	0	1	0	0	0	1	0	0	1	1	0	0	0	0	0	0	0	0	0	KP
24	21	44	1	1	0	1	1	0	0	1	1	0	0	0	1	0	0	0	1	0	0	0	0	0	0	0	0	0	KP
48	15	36	2	1	0	0	1	0	0	1	1	0	0	0	0	0	0	1	1	0	0	0	0	0	0	0	0	0	KP
35	20	23	0	1	0	1	1	0	0	0	0	0	1	0	1	0	0	1	0	1	0	0	0	0	0	0	0	0	KP
28	10	24	0	1	0	1	0	1	0	0	0	0	1	0	0	0	0	1	0	0	0	0	0	0	0	0	0	0	KP
12	0	42	0	1	0	1	0	1	0	0	0	0	1	0	1	0	0	0	0	1	0	0	0	1	0	0	1	0	KP
23	5	9	0	0	0	1	1	0	0	0	1	0	0	0	1	0	0	1	0	0	0	0	0	1	0	0	1	0	KP
54	21	17	1	1	0	1	1	1	0	1	0	0	1	0	1	0	0	1	1	1	0	0	0	1	0	0	1	0	KP
84	23	72	0	1	0	1	1	0	0	1	1	0	0	0	0	0	0	1	0	0	0	0	0	0	0	0	0	0	KP
29	7	30	2	0	0	0	1	0	0	0	1	0	0	0	0	0	0	1	0	0	0	0	0	0	0	0	0	0	KP
24	7	35	0	0	0	0	1	0	0	0	1	0	0	0	0	0	0	1	0	0	0	0	0	1	0	1	1	0	KP
9	7	30	0	1	0	1	1	0	0	0	0	0	1	0	1	0	0	1	0	1	0	0	0	1	0	0	1	0	KP
28	18	28	2	0	1	0	1	0	0	1	0	0	1	0	1	0	0	1	0	1	0	0	1	1	1	1	1	1	KP
31	26	19	0	1	1	0	1	1	0	1	0	0	0	0	0	0	0	1	1	0	0	0	1	1	1	1	1	1	KP
28	24	29	2	1	0	1	1	0	0	0	0	0	0	0	0	0	0	1	0	0	0	0	0	0	0	0	0	0	KP
25	5	20	0	1	0	1	1	0	0	0	1	0	0	0	1	0	0	1	0	0	0	0	0	0	0	0	0	0	KP
33	18	10	0	0	0	1	1	0	0	0	1	0	0	0	0	0	0	0	0	0	0	0	0	1	0	0	1	0	KP
28	14	11	0	0	0	1	1	0	0	0	1	0	0	0	1	0	0	1	0	0	0	0	0	0	0	0	0	0	KP
37	18	54	0	0	0	1	1	0	0	0	0	0	0	0	0	0	0	0	0	0	0	0	0	0	0	0	0	0	KP
33	27	17	2	1	0	1	1	0	0	1	0	1	0	0	0	0	0	1	1	0	0	1	1	1	1	1	1	1	KP
30	1	13	0	1	0	1	1	0	0	0	1	0	0	0	1	0	0	0	0	0	0	0	0	0	0	0	0	0	KP
35	11	27	0	0	0	1	1	0	0	0	1	0	0	0	1	0	0	1	0	0	0	0	0	0	0	0	0	0	KP
22	3	41	0	0	0	1	1	0	0	0	1	0	0	1	1	0	0	1	0	0	0	0	1	1	0	0	1	0	KP
24	4	42	0	0	0	1	1	0	0	0	1	0	0	0	1	0	0	0	0	0	0	0	0	0	0	0	0	0	KP
23	7	63	0	1	0	0	1	0	1	0	0	1	0	0	0	0	0	1	1	0	0	0	0	0	0	0	0	0	KP
15	8	47	0	1	0	1	1	0	0	0	0	0	1	0	0	0	0	1	1	0	0	0	0	0	0	0	0	0	KP
27	11	39	0	1	0	1	1	0	0	0	0	1	0	0	0	0	0	1	1	0	1	0	0	1	0	1	1	0	KP
22	7	39	0	1	0	1	1	0	0	0	1	0	0	1	1	0	0	0	1	0	0	0	0	1	0	1	1	0	KP
36	23	40	1	0	0	1	1	0	0	1	0	0	0	0	1	0	0	1	1	0	0	0	0	0	0	0	0	0	KP
40	11	20	2	1	0	0	1	0	0	1	1	0	0	0	0	0	0	1	1	0	0	0	1	1	0	1	1	0	KP
40	11	20	2	1	0	0	1	0	0	1	1	0	0	0	0	0	0	0	1	0	0	0	0	1	0	1	1	0	KP
27	14	70	2	1	0	1	1	0	0	0	0	0	0	0	0	0	0	1	0	0	0	0	0	1	0	0	1	0	KP
25	16	55	0	0	0	0	1	0	0	0	1	0	0	0	1	0	0	1	0	1	0	0	0	1	0	0	0	0	KP
17	6	38	0	1	0	0	1	0	1	1	1	0	0	0	1	1	0	0	1	0	0	0	0	0	0	1	0	0	KP
38	0	38	0	1	0	0	1	0	1	1	1	0	0	0	1	1	0	1	1	0	0	0	0	0	0	1	0	0	KP
28	14	47	2	0	0	0	1	0	0	1	0	1	0	0	0	0	0	0	1	0	0	0	0	0	0	0	0	0	KP
25	8	61	0	1	0	1	1	0	0	0	1	0	0	0	0	0	0	0	0	0	0	0	0	0	0	0	0	0	KP
29	16	51	1	0	0	0	1	0	0	1	0	1	0	0	1	1	0	1	0	0	0	0	1	1	1	1	1	1	KP
51	0	49	1	1	0	1	1	1	0	0	1	0	0	0	1	0	1	1	0	0	0	0	1	1	1	1	1	1	KP
22	5	31	0	1	0	1	1	0	0	0	0	0	0	1	1	0	0	1	0	0	0	0	0	0	0	0	0	0	KP
19	0	48	0	0	0	1	1	0	0	0	1	0	0	0	0	0	0	0	0	1	0	0	0	0	0	0	0	0	KP
19	0	48	0	0	0	1	1	0	0	0	1	0	0	0	0	0	0	1	0	0	0	0	0	1	0	0	1	0	KP
19	15	49	2	0	0	1	1	0	0	1	0	0	0	0	0	0	0	0	0	0	0	0	0	0	0	0	0	0	KP
42	25	41	0	1	0	1	1	1	1	1	1	0	0	0	0	0	0	0	0	0	0	0	0	1	0	1	1	0	KP
30	4	58	0	1	0	1	1	0	0	0	1	0	0	0	1	0	0	1	0	0	0	0	0	0	0	0	0	0	KP
35	0	43	0	0	0	0	0	1	0	1	1	0	0	0	0	0	0	1	0	0	0	0	0	1	0	0	0	0	KP
8	0	37	0	1	1	1	0	1	0	1	0	0	0	0	1	0	0	1	0	1	0	0	0	1	0	0	1	0	KP
30	4	38	0	1	0	0	1	0	0	1	1	0	0	1	1	0	0	0	0	0	0	0	0	0	0	0	0	0	KP
22	5	27	0	0	1	1	1	0	0	0	1	0	0	0	1	1	0	1	0	0	0	0	0	0	0	0	0	0	KP
31	17	11	0	0	0	1	1	0	0	0	0	0	1	0	0	0	0	1	0	1	0	0	0	0	0	0	0	0	KP
26	12	8	0	0	0	1	1	0	0	0	1	0	0	0	1	0	0	0	0	0	0	0	0	1	0	0	1	0	KP
21	9	27	0	0	0	1	1	0	0	0	1	0	0	0	0	0	0	1	0	0	0	0	0	0	0	0	0	0	KP
24	8	50	0	1	0	0	1	0	0	1	0	0	0	0	1	0	0	1	0	0	0	0	0	0	0	0	0	0	KP
51	14	71	1	0	0	1	0	0	1	0	0	1	0	0	0	0	0	1	1	0	0	1	1	1	1	1	1	1	KP
30	6	60	0	1	0	1	1	0	0	1	1	0	0	0	0	0	0	0	1	0	0	0	0	0	0	0	0	0	KP
31	7	18	0	0	0	0	1	0	0	0	1	0	0	0	1	0	0	1	0	1	0	0	0	0	0	0	0	0	KP
22	5	13	1	1	0	0	1	0	0	0	1	0	0	0	0	1	0	0	0	0	0	0	0	0	0	0	0	0	KP
23	10	13	0	1	0	1	1	0	0	0	1	0	0	0	1	0	0	1	0	0	0	0	0	0	0	0	0	0	KP
46	4	50	2	0	0	0	1	0	0	1	1	0	0	0	0	0	0	0	1	0	0	0	0	0	0	0	0	0	KP
21	7	50	0	0	0	0	1	0	0	1	0	1	0	0	1	0	0	1	1	0	0	0	0	0	0	0	0	0	KP
32	17	51	0	1	0	1	1	0	1	0	0	0	0	0	1	0	0	0	0	0	1	0	0	1	0	1	1	0	KP
30	9	32	2	1	0	0	1	0	0	0	0	0	1	0	0	0	0	1	0	1	0	0	0	0	0	0	0	0	KP
44	12	32	0	1	0	0	1	0	0	0	0	0	0	0	0	0	0	1	0	1	0	0	0	1	0	1	1	0	KP
19	4	29	1	1	0	0	1	0	0	0	1	0	0	0	0	0	0	0	0	0	0	0	0	0	0	0	0	0	KP
19	7	10	0	0	0	1	1	0	0	0	1	0	0	0	0	0	0	1	0	0	0	0	0	1	0	0	1	0	KP
32	14	10	0	0	0	1	1	0	0	0	1	0	0	0	0	0	0	1	0	0	0	0	0	1	0	0	1	0	KP
22	8	15	0	0	0	1	1	0	0	0	0	1	0	0	0	0	0	1	1	0	0	0	0	0	0	0	0	0	KP
26	7	21	0	1	0	1	1	0	0	1	0	0	0	0	1	0	0	1	1	0	0	0	0	1	0	0	1	0	KP
72	0	43	0	0	0	1	0	1	0	1	0	1	0	0	1	0	0	1	1	0	0	0	0	1	0	0	0	0	KP
29	0	54	0	1	0	1	1	0	0	0	1	0	0	0	0	0	0	1	0	0	0	0	0	0	0	0	0	0	KP
32	25	50	2	0	0	0	1	0	0	1	1	0	0	0	0	0	0	1	1	0	0	0	0	1	0	0	0	0	KP
26	12	51	0	0	0	0	1	0	0	0	1	0	0	1	1	0	0	0	0	0	0	0	0	0	0	0	0	0	KP
32	17	51	0	0	0	0	1	0	0	0	1	0	0	0	1	0	0	0	1	0	0	0	0	1	0	0	1	0	KP
32	17	51	0	0	0	0	1	0	0	0	1	0	0	0	1	0	0	1	1	0	0	0	0	1	0	0	1	0	KP
41	0	42	0	1	0	1	1	1	0	1	0	0	0	1	1	0	0	0	1	0	0	0	0	0	0	0	0	0	KP
21	4	59	0	1	0	1	1	0	0	0	0	0	1	0	0	0	0	0	0	1	0	0	0	0	0	0	0	0	KP
22	10	64	1	1	0	1	1	0	0	0	1	0	0	0	1	0	0	0	0	0	0	0	0	0	0	0	0	0	KP
51	50	42	1	0	0	1	1	0	0	0	0	0	1	0	1	0	0	0	1	0	0	0	1	1	1	1	1	0	KP
51	50	42	1	0	0	1	1	0	0	0	0	0	1	0	1	0	0	1	1	0	0	0	1	1	1	1	1	0	KP
28	21	36	1	1	0	1	1	1	0	1	0	0	1	1	1	1	0	1	1	1	0	0	1	1	1	1	1	0	KP
41	3	36	1	1	0	1	1	1	0	1	0	0	0	1	1	1	0	1	1	1	0	0	1	1	1	1	1	0	KP
24	2	37	1	1	0	1	0	1	0	0	1	0	0	1	1	1	0	1	1	0	1	1	1	1	1	1	1	0	KP
23	4	20	0	0	0	1	1	0	0	0	1	0	0	0	0	0	0	0	0	0	0	0	0	0	0	0	0	0	KP
23	4	20	0	0	0	1	1	0	0	0	1	0	0	0	1	1	0	0	0	0	0	0	0	1	0	0	1	0	KP
21	5	38	0	0	0	0	1	0	0	1	1	0	0	0	1	0	0	1	1	0	0	0	1	1	1	1	1	0	KP
29	12	45	0	0	0	1	1	0	0	0	1	0	0	0	0	0	0	1	0	0	0	0	0	0	0	0	0	0	KP
24	8	32	0	0	0	0	1	0	0	0	0	1	0	0	0	0	0	1	1	0	0	0	0	0	0	0	0	0	KP
20	6	15	0	1	0	1	1	0	0	0	1	0	0	0	1	0	0	1	0	0	0	0	0	0	0	0	0	0	KP
28	9	35	0	0	0	0	1	0	0	0	1	0	0	0	0	0	0	0	0	0	0	0	0	0	0	0	0	0	KP
62	21	48	0	1	0	0	1	1	0	0	1	0	0	0	1	0	0	0	0	0	0	0	1	1	1	1	1	1	KP
13	13	28	1	1	0	1	1	0	0	0	0	0	0	0	1	0	0	0	0	0	0	0	0	0	0	0	0	0	KP
40	34	52	2	0	0	0	1	0	1	0	1	0	0	1	1	0	0	1	1	0	0	0	0	0	0	0	0	0	KP
18	5	7	0	1	0	0	1	0	0	0	1	0	0	0	0	0	0	1	0	0	0	0	0	1	0	1	1	0	KP
22	11	46	2	1	0	1	1	0	0	0	1	0	0	0	0	0	0	0	0	0	0	0	0	0	0	0	0	0	KP
83	81	38	0	0	0	1	1	0	0	1	0	0	0	1	1	1	0	0	1	0	0	0	1	1	1	1	1	1	KP
83	81	38	0	0	0	1	1	0	0	1	0	0	0	1	1	1	0	0	1	0	0	0	1	1	1	1	1	1	KP
21	12	63	0	0	0	1	1	0	0	1	1	0	0	0	1	0	0	0	0	0	0	0	0	0	0	0	0	0	KP
10	4	19	0	1	0	1	1	0	0	0	1	0	0	1	1	1	0	0	0	0	0	0	0	0	0	0	0	0	KP
24	20	29	1	0	0	1	1	0	0	0	1	0	0	1	1	1	0	1	0	1	0	0	0	1	0	0	1	0	KP
27	8	25	0	1	0	1	1	0	0	0	1	0	0	0	1	0	0	0	0	0	0	0	0	1	0	0	1	0	KP
34	25	22	2	1	0	0	1	0	0	1	1	0	0	0	1	0	0	1	1	0	0	0	0	0	0	0	0	0	KP
28	10	23	0	1	0	0	1	1	0	1	0	0	0	0	0	0	0	1	1	1	0	0	0	0	0	0	0	0	KP
28	0	36	0	0	0	0	1	1	0	0	0	0	0	0	0	0	0	1	0	1	0	0	1	1	1	1	1	1	KP
25	7	45	2	0	0	0	1	0	1	1	1	0	0	0	0	0	0	0	0	0	0	0	0	0	0	0	0	0	KP
25	12	11	0	1	0	1	1	0	0	0	1	0	0	0	1	0	0	1	0	0	0	0	0	0	0	0	0	0	KP
22	8	4	0	0	0	1	1	0	0	0	1	0	0	0	1	0	0	1	0	0	0	0	0	0	0	0	0	0	KP
23	4	23	0	1	0	0	1	0	0	0	1	0	0	0	1	0	0	0	0	0	0	0	0	0	0	0	0	0	KP
29	13	49	2	0	0	1	1	0	0	1	0	1	0	0	1	1	0	1	1	0	0	1	0	1	0	0	1	0	KP
26	9	17	0	1	0	1	1	0	0	0	0	0	1	0	1	1	0	1	0	1	0	0	0	1	0	0	1	0	KP
25	16	8	0	0	0	0	1	0	0	1	0	1	0	0	1	0	0	0	1	0	0	0	0	1	0	1	0	0	KP
25	7	61	1	0	0	0	1	0	0	0	0	1	0	0	0	0	0	1	1	0	0	0	0	0	0	0	0	0	KP
20	6	8	0	1	0	1	1	0	0	0	1	0	0	0	1	0	0	1	0	0	0	0	0	0	0	0	0	0	KP
33	10	37	0	1	0	1	1	0	0	0	1	0	0	0	0	0	0	1	0	0	0	0	0	0	0	0	0	0	KP
34	5	56	2	1	0	0	1	0	1	1	1	0	0	0	0	0	0	1	1	0	0	0	0	0	0	0	0	0	KP
17	8	37	0	0	0	1	1	0	0	0	0	0	0	1	1	0	0	0	0	0	0	0	0	0	0	0	0	0	KP
9	5	14	2	1	0	0	1	0	0	0	1	0	0	0	0	0	0	1	1	0	0	1	0	0	0	0	0	0	KP
22	0	21	0	0	0	0	1	0	0	0	1	0	0	0	1	0	0	1	0	0	0	0	0	0	0	0	0	0	KP
9	9	42	0	0	0	1	1	0	0	0	1	0	0	1	1	0	0	1	0	0	0	0	0	0	0	0	0	0	KP
25	6	32	0	0	0	1	1	0	0	0	0	1	0	0	1	0	0	1	1	0	0	0	0	0	0	0	0	0	KP
21	7	13	0	1	0	0	1	0	0	0	1	0	0	0	0	0	0	1	0	0	0	0	1	0	0	0	0	0	KP
178	13	39	1	0	0	1	1	0	0	1	1	0	0	0	0	0	0	1	1	0	0	0	0	0	0	0	0	0	KP
65	19	40	1	0	0	1	1	1	0	0	0	1	0	0	0	0	0	1	1	0	0	1	1	1	0	1	1	0	KP
59	9	51	0	0	0	0	1	1	0	1	0	1	0	0	0	0	0	0	0	0	0	0	0	1	0	0	0	0	KP
34	9	52	0	1	0	0	1	0	0	0	0	0	0	0	0	0	0	0	1	0	0	0	0	1	0	1	1	0	KP
31	23	48	1	1	0	1	1	0	0	0	1	0	0	0	0	0	0	1	1	0	0	0	0	1	0	1	1	0	KP
20	4	48	0	1	0	1	1	0	0	0	1	0	0	0	1	0	0	1	0	0	0	0	0	1	0	1	1	0	KP
32	4	39	2	1	0	0	1	0	0	1	1	0	0	0	0	0	0	1	1	1	0	0	0	0	0	0	0	0	KP
35	9	40	0	1	0	0	1	0	0	0	1	0	0	0	0	0	0	0	0	1	1	0	0	0	0	0	0	0	KP
24	5	44	0	0	0	0	1	0	0	0	1	0	0	0	0	0	0	1	0	0	0	0	0	0	0	0	0	0	KP
22	9	38	1	1	0	0	1	0	0	1	1	0	0	0	0	0	0	1	0	0	0	0	0	0	0	0	0	0	KP
28	11	8	0	1	0	1	1	0	0	0	0	1	0	0	0	0	0	1	1	0	0	0	0	0	0	0	0	0	KP
70	54	72	0	0	0	1	1	0	0	1	0	1	0	0	0	0	0	0	1	0	0	0	0	0	0	0	0	0	KP
21	4	28	0	0	0	0	1	0	0	0	1	0	0	1	0	0	0	1	0	0	0	0	0	0	0	0	0	0	KP
79	6	52	0	1	0	1	1	1	0	0	1	0	0	0	0	0	0	0	0	1	0	0	1	1	1	1	1	1	KP
27	17	42	0	1	0	0	1	0	1	1	1	0	0	0	0	0	0	1	0	0	1	0	0	0	0	0	0	0	KP
22	11	13	0	0	0	1	1	0	0	0	1	0	0	0	1	0	0	1	0	0	0	0	0	0	0	0	0	0	KP
25	4	26	0	1	0	0	1	0	0	0	1	0	0	0	0	0	0	1	0	0	0	0	0	0	0	0	0	0	KP
37	14	52	0	1	0	0	1	0	0	1	0	1	0	0	0	0	0	0	1	1	0	0	0	1	0	0	1	0	KP
26	0	41	0	1	0	1	1	0	0	0	0	0	0	1	1	0	0	1	1	1	0	0	0	1	0	1	1	0	KP
26	10	16	0	0	0	1	1	0	0	0	1	0	0	0	0	0	0	1	0	0	0	0	0	1	0	0	0	0	KP
22	4	43	0	0	0	1	1	0	0	0	1	0	0	0	0	0	0	0	0	0	0	0	0	0	0	0	0	0	KP
19	5	51	0	0	0	1	1	0	0	0	1	0	0	0	0	0	0	1	0	0	0	0	0	0	0	0	0	0	KP
19	3	51	0	0	0	1	1	0	0	0	1	0	0	0	0	0	0	1	0	0	0	0	0	0	0	0	0	0	KP
28	6	55	2	0	0	0	1	0	0	0	1	0	0	0	0	0	0	1	0	0	0	0	0	0	0	0	0	0	KP
55	4	55	0	0	0	0	1	0	0	1	1	0	0	0	1	0	0	0	1	0	0	0	0	1	0	1	1	0	KP
62	0	55	0	0	0	0	0	1	0	1	1	0	0	0	1	0	0	1	1	0	0	0	0	0	0	0	0	0	KP
20	5	13	0	0	0	1	1	0	0	0	0	0	0	0	1	0	0	1	0	0	0	0	0	1	0	0	1	0	KP
34	15	37	0	1	0	1	1	0	0	1	0	1	0	0	0	0	0	1	1	0	0	0	0	0	0	0	0	0	KP
31	25	37	0	1	0	1	1	0	0	0	0	0	0	0	0	0	0	1	1	0	0	0	0	0	0	0	0	0	KP
24	7	15	0	1	0	1	1	0	0	0	1	0	0	0	0	0	0	1	0	0	0	0	0	0	0	0	0	0	KP
12	23	60	1	1	0	1	1	0	0	0	0	1	0	0	0	0	0	1	1	0	0	0	0	1	0	0	1	0	KP
26	14	27	2	0	0	0	1	0	0	0	0	0	1	0	0	0	0	0	0	1	0	0	0	0	0	0	0	0	KP
49	30	27	1	1	0	0	0	0	0	0	0	1	0	0	0	0	0	1	1	1	1	1	0	1	0	0	1	0	KP
19	10	55	2	1	0	1	1	0	0	0	1	0	0	0	0	0	0	1	0	0	0	0	0	0	0	0	0	0	KP
34	20	48	0	1	0	1	1	0	0	1	0	0	0	0	0	0	0	1	0	1	0	0	0	0	0	0	0	0	KP
46	0	48	0	1	0	1	0	1	0	0	0	0	0	0	0	0	0	1	0	0	0	0	0	0	0	0	0	0	KP
34	20	49	0	1	0	1	0	1	0	1	0	0	0	0	0	0	0	1	0	0	0	0	0	0	0	0	0	0	KP
46	0	49	0	1	0	1	0	1	0	0	0	0	0	0	0	0	0	1	1	0	0	0	0	0	0	0	0	0	KP
46	0	49	0	1	0	1	0	1	0	0	0	0	0	0	0	0	0	1	1	0	0	1	0	0	0	0	0	0	KP
32	5	56	0	0	0	0	1	0	0	0	1	0	0	0	0	0	0	1	0	0	0	0	0	1	0	0	1	0	KP
29	5	14	0	1	0	1	1	0	0	0	1	0	0	0	0	0	0	0	0	0	0	0	0	0	0	0	0	0	KP
29	13	35	0	0	0	0	1	1	0	0	1	0	0	0	0	0	0	0	0	0	0	0	0	1	0	1	1	0	KP
19	3	57	0	0	0	1	1	0	0	0	0	1	0	0	0	0	0	1	1	0	0	0	0	0	0	0	0	0	KP
23	8	51	0	1	0	1	1	0	0	0	1	0	0	0	1	0	0	0	0	0	0	0	0	1	0	0	0	0	KP
31	10	18	0	1	0	0	1	0	0	1	0	0	0	0	1	0	0	0	0	0	0	0	0	0	0	0	0	0	KP
25	14	7	0	1	0	1	1	0	0	0	1	0	0	1	0	0	0	0	0	0	0	0	0	0	0	0	0	0	KP
25	9	36	0	0	0	0	1	0	0	0	1	0	0	0	0	0	0	0	0	0	0	0	0	0	0	0	0	0	KP
60	17	37	0	0	0	0	1	0	0	0	1	0	0	0	1	0	0	1	1	0	0	0	0	0	0	0	0	0	KP
22	5	36	0	1	0	1	1	0	0	0	1	0	0	0	0	0	0	1	0	0	0	0	0	0	0	0	0	0	KP
19	4	54	0	1	0	1	1	0	0	1	0	0	0	0	0	1	0	1	0	0	1	1	0	0	0	0	0	0	KP
26	13	59	0	0	0	1	1	0	0	0	0	0	0	0	0	0	0	1	1	0	0	0	0	0	0	0	0	0	KP
32	9	53	0	0	0	1	1	0	0	0	0	1	0	0	0	0	0	0	1	0	0	0	0	0	0	0	0	0	KP
34	7	17	2	1	0	0	1	0	0	1	1	0	0	0	0	0	0	0	0	0	0	0	0	0	0	0	0	0	KP
50	0	58	1	1	0	1	0	1	0	1	0	0	0	0	0	0	0	1	1	0	0	0	1	1	1	1	1	0	KP
50	0	58	1	1	0	1	0	1	0	1	0	0	0	0	1	0	0	1	1	0	0	0	1	1	1	1	1	0	KP
31	4	32	0	1	0	0	1	0	0	1	1	0	0	0	1	1	0	0	0	0	0	0	0	0	0	0	0	0	KP
24	8	32	0	1	0	1	1	0	1	1	1	0	0	0	0	0	0	0	0	0	1	0	0	0	0	0	0	0	KP
22	11	46	0	0	0	1	1	0	0	0	0	1	0	0	0	0	0	1	1	0	0	0	0	0	0	0	0	0	KP
32	13	46	1	0	0	1	1	0	0	0	1	0	0	0	1	0	0	0	0	0	0	0	1	1	1	1	1	1	KP
30	16	32	0	0	0	0	1	0	0	1	0	0	0	0	1	0	0	1	1	0	1	0	0	0	0	0	0	0	KP
22	12	14	0	0	0	1	1	0	0	0	1	0	0	0	0	0	0	1	0	0	0	0	0	0	0	0	0	0	KP
45	14	21	0	1	0	1	1	0	0	1	1	0	0	0	0	0	0	1	0	0	0	0	0	0	0	0	0	0	KP
27	9	35	1	0	0	1	1	0	0	1	1	0	0	0	0	0	0	1	1	0	0	0	0	0	0	0	0	0	KP
24	9	36	0	0	0	1	1	0	0	0	1	0	0	0	0	0	0	0	0	0	0	0	0	0	0	0	0	0	KP
21	6	33	0	1	0	1	1	0	0	0	1	0	0	0	0	0	0	1	1	1	0	0	0	0	0	0	0	0	KP
40	18	43	0	0	0	1	1	0	0	0	1	0	0	0	0	0	0	1	0	0	0	0	0	0	0	0	0	0	KP
23	9	19	0	0	0	1	1	0	0	0	1	0	0	0	0	0	0	0	0	1	0	0	0	0	0	0	0	0	KP
25	11	57	2	0	0	0	1	0	0	1	1	0	0	0	0	0	0	1	0	0	0	0	0	0	0	0	0	0	KP
57	3	59	0	1	0	1	0	0	0	1	0	0	0	1	1	0	0	1	1	0	1	0	0	0	0	0	0	0	KP
28	21	18	0	1	0	1	1	0	0	1	0	0	0	0	1	0	0	1	1	0	0	0	1	1	0	1	1	0	KP
30	4	57	0	0	0	0	1	0	0	1	0	0	0	0	0	0	0	0	1	0	1	0	0	0	0	0	0	0	KP
38	14	34	0	0	0	0	1	0	0	1	0	0	1	0	1	0	0	1	1	1	0	0	1	1	1	1	1	1	KP
21	7	38	0	0	0	1	1	0	0	0	1	0	0	0	0	0	0	1	1	0	0	0	0	0	0	0	0	0	KP
10	6	17	0	1	0	1	1	0	0	0	1	0	0	0	0	0	0	1	0	0	0	0	0	0	0	0	0	0	KP
55	28	6	1	1	0	0	1	0	0	0	1	0	0	0	0	0	0	1	1	0	0	0	0	0	0	0	0	0	KP
42	41	45	1	0	0	1	1	0	0	1	1	0	0	0	0	0	0	0	1	0	0	0	0	0	0	0	0	0	KP
42	41	45	2	0	0	1	1	0	0	1	1	0	0	0	0	0	0	0	1	0	0	0	1	1	1	1	1	0	KP
21	7	13	0	0	0	1	1	0	0	0	1	0	0	0	1	0	0	1	0	0	0	0	0	0	0	0	0	0	KP
26	19	46	2	1	0	1	1	0	0	1	0	0	0	0	0	0	0	0	0	0	0	0	1	0	1	1	0	0	KP
30	10	31	0	1	0	0	1	0	0	1	1	0	0	0	0	0	0	1	0	1	0	0	0	0	0	0	0	0	KP
26	14	53	2	0	0	1	1	0	0	1	1	0	0	0	0	0	0	1	0	0	1	0	1	0	1	0	0	0	KP
25	16	32	2	1	0	1	1	0	0	0	0	0	0	0	0	0	0	1	0	0	0	0	1	0	0	0	0	0	KP
49	5	53	0	0	0	0	1	0	0	0	0	0	0	0	0	0	0	1	0	0	0	0	0	0	0	0	0	0	KP
24	7	25	2	1	0	0	1	0	0	0	1	0	0	0	0	0	0	1	0	0	0	0	0	0	0	0	0	0	KP
23	6	1	0	1	0	1	1	0	0	0	1	0	0	0	1	0	0	0	0	0	0	0	0	0	0	0	0	0	KP
24	17	57	2	0	0	1	1	0	0	1	0	1	0	0	0	0	0	1	1	0	1	0	0	0	0	0	0	0	KP
22	6	57	0	0	0	1	1	0	0	0	0	1	0	0	0	0	0	0	1	0	0	0	0	1	0	0	1	0	KP
22	10	60	2	1	0	1	1	0	0	1	0	0	0	0	0	0	0	1	1	0	0	0	0	1	0	0	0	0	KP
26	10	35	2	1	0	0	1	0	0	1	1	0	0	0	0	0	0	1	0	0	0	0	0	0	0	0	0	0	KP
6	4	48	0	0	0	1	1	0	0	0	0	1	0	1	1	0	0	1	1	0	0	0	1	1	0	0	1	0	KP
37	20	62	0	0	0	1	1	1	0	0	0	0	0	0	0	0	0	0	0	0	0	0	1	1	1	0	1	0	KP
18	9	7	1	1	0	1	1	0	0	0	1	0	0	0	1	0	0	0	1	0	0	0	0	1	0	0	1	0	KP
17	0	40	2	1	0	0	1	0	0	1	1	0	0	0	0	0	0	1	0	0	0	0	0	0	0	0	0	0	KP
25	15	13	0	0	0	1	1	0	0	0	0	0	0	0	0	0	0	1	0	0	0	0	0	1	0	1	1	0	KP
27	14	54	0	0	0	1	1	0	0	0	1	0	0	0	0	0	0	1	0	0	0	0	0	1	0	0	0	0	KP
29	11	33	0	0	0	1	1	0	0	0	1	0	0	0	0	0	0	1	1	1	0	0	0	0	0	0	0	0	KP
28	10	64	0	1	0	1	1	0	NA	0	0	1	0	0	0	0	0	1	1	0	0	0	0	0	0	0	0	0	ecl
21	3	63	0	0	0	1	1	0	NA	0	0	1	0	0	0	0	0	1	1	0	0	0	0	0	0	0	0	0	ecl
28	28	53	1	0	0	1	1	0	NA	1	0	1	0	0	1	0	0	0	1	0	0	0	0	0	0	0	0	0	ecl
97	31	57	1	1	0	1	1	0	NA	0	0	0	1	0	1	0	0	1	0	1	0	0	0	0	0	0	0	0	ecl
45	40	9	1	0	0	0	1	0	NA	0	0	0	0	0	0	0	0	1	0	0	0	0	0	0	0	0	0	0	ecl
22	7	34	0	0	0	0	1	0	NA	0	1	0	0	0	0	0	0	1	0	0	0	0	0	0	0	0	0	0	ecl
54	15	44	0	1	0	0	1	0	NA	1	1	0	0	0	1	0	0	1	0	0	0	0	0	0	0	0	0	0	ecl
22	7	46	0	0	0	0	1	0	NA	1	1	0	0	0	1	0	0	0	0	0	0	0	0	0	0	0	0	0	ecl
90	73	15	1	1	0	1	1	0	NA	0	0	0	0	0	1	0	0	1	0	0	0	0	0	0	0	0	0	0	ecl
56	14	18	1	0	0	0	1	0	NA	0	0	1	0	0	1	0	0	1	0	1	0	0	0	0	0	0	0	0	ecl
94	41	42	2	1	0	0	1	0	NA	1	0	1	1	0	1	0	0	0	1	1	0	0	0	0	0	0	0	0	ecl
21	5	10	1	1	0	0	1	0	NA	1	0	0	0	0	0	0	0	1	0	0	0	0	0	0	0	0	1	0	ecl
31	5	25	0	0	1	1	1	0	NA	0	0	1	1	0	1	0	0	1	1	1	0	0	1	1	1	1	1	0	ecl
20	11	33	0	1	0	1	1	0	NA	1	0	1	1	0	1	0	0	0	1	1	0	0	0	0	0	0	0	0	ecl
23	0	7	0	1	0	1	1	0	NA	0	0	1	0	0	0	0	0	0	1	0	0	0	0	0	0	0	0	0	ecl
44	20	58	1	0	0	1	1	0	NA	1	0	1	0	0	0	0	0	1	1	0	0	0	0	0	0	0	0	0	ecl
41	33	10	2	1	0	1	1	0	NA	0	0	0	1	0	1	0	0	1	0	1	0	0	0	0	0	0	0	0	ecl
26	11	46	2	0	0	1	1	0	NA	0	0	0	1	0	1	0	0	1	0	1	0	0	0	0	0	0	1	0	ecl
21	3	46	0	0	0	1	1	0	NA	0	1	0	0	1	1	1	0	1	0	0	0	0	0	0	0	0	1	0	ecl
42	33	42	1	1	0	1	1	0	NA	1	0	0	0	0	1	0	0	1	0	0	0	0	0	0	0	0	0	0	ecl
31	9	34	1	0	0	0	1	0	NA	0	0	1	0	0	1	0	1	0	1	0	1	0	1	1	1	1	1	1	ecl
29	12	43	0	0	0	1	1	0	NA	0	0	0	1	0	1	0	0	1	0	1	0	0	0	0	0	0	0	0	ecl
20	5	61	0	1	0	0	1	0	NA	0	0	1	0	0	0	0	0	0	1	0	0	0	0	0	0	0	0	0	ecl
28	0	7	2	0	0	1	0	0	NA	0	1	0	0	0	1	0	0	0	0	0	0	0	0	0	0	0	0	0	ecl
28	0	7	2	0	0	1	0	0	NA	0	1	0	0	0	1	0	0	0	0	0	0	0	0	0	0	0	0	0	ecl
42	8	21	0	1	0	0	1	0	NA	0	0	0	0	0	1	0	0	1	0	0	0	0	0	0	0	0	0	0	ecl
47	7	55	0	0	0	0	1	0	NA	1	1	0	0	0	1	0	0	0	0	0	0	0	0	0	0	0	0	0	ecl
24	21	54	2	0	0	1	1	0	NA	0	0	1	0	1	0	0	0	0	1	0	0	0	0	0	0	0	0	0	ecl
61	15	45	1	0	0	1	1	0	NA	1	0	1	0	0	0	0	0	0	1	0	1	0	0	0	0	0	0	0	ecl
34	14	56	2	0	0	0	1	0	NA	1	0	1	0	0	0	0	0	1	1	0	0	0	0	0	0	0	0	0	ecl
29	43	17	1	1	0	1	1	0	NA	0	0	0	1	0	1	0	0	1	0	1	0	0	0	0	0	0	0	0	ecl
26	34	64	1	0	0	1	1	0	NA	1	0	1	0	0	1	0	0	0	1	0	0	0	0	0	0	0	0	1	ecl
37	9	11	1	1	0	0	1	1	NA	0	0	0	0	0	1	0	0	1	0	0	0	0	0	0	0	0	0	0	ecl
21	7	54	0	1	0	1	1	0	NA	1	1	0	0	0	1	1	0	0	0	0	0	0	0	0	0	0	0	0	ecl
25	7	55	0	1	0	1	1	0	NA	1	0	1	0	0	1	1	0	1	1	0	0	0	0	0	0	0	1	0	ecl
65	23	12	0	0	0	1	1	0	NA	0	0	0	1	1	1	0	0	1	0	1	0	0	0	0	0	0	0	0	ecl
54	0	4	2	1	0	0	1	0	NA	0	0	0	1	0	1	0	0	0	0	1	0	0	0	0	0	0	0	0	ecl
33	0	46	0	0	0	0	1	0	NA	0	0	1	0	0	1	0	0	0	1	0	0	0	0	0	0	0	0	0	ecl
22	0	48	0	0	0	1	1	0	NA	0	0	1	0	1	0	0	0	0	1	0	0	0	0	0	0	0	0	0	ecl
68	0	16	2	0	0	0	1	0	NA	0	0	0	0	1	1	0	0	0	0	0	0	0	1	1	1	1	0	0	ecl
22	0	24	0	1	0	1	1	0	NA	0	0	0	0	1	0	0	0	0	0	0	0	0	0	0	0	0	0	0	ecl
76	0	44	1	1	1	1	1	0	NA	0	0	1	1	1	1	0	0	0	1	1	0	0	1	1	1	1	1	0	ecl
55	0	24	0	1	0	0	1	0	NA	0	0	0	1	0	1	0	0	0	0	1	0	0	0	0	0	0	0	0	ecl
25	0	51	0	1	0	1	1	0	NA	0	0	1	0	1	1	0	0	0	1	0	0	0	0	0	0	0	1	0	ecl
138	0	5	1	1	0	0	1	0	NA	0	0	1	0	0	1	0	1	0	1	0	0	0	0	1	0	1	1	1	ecl
52	0	48	0	1	1	1	1	0	NA	0	0	1	0	0	1	0	1	0	1	0	0	0	1	1	1	1	0	1	ecl
62	0	17	0	1	0	1	1	0	NA	0	0	0	1	0	1	0	0	0	0	1	0	0	0	0	0	0	0	0	ecl
187	45	29	0	1	1	1	0	1	NA	1	0	1	0	1	1	0	0	1	1	0	0	0	0	0	0	0	0	0	ecl
35	0	34	0	0	0	1	1	0	NA	0	1	0	0	0	1	0	1	0	0	0	0	0	0	1	0	1	0	1	ecl
48	0	48	2	0	0	1	1	0	NA	0	0	1	0	1	1	0	0	0	1	0	0	0	1	1	1	1	1	0	ecl
40	0	41	1	1	0	0	1	0	NA	0	0	0	0	0	0	0	0	0	0	0	0	0	0	0	0	0	1	0	ecl
34	0	46	0	0	0	0	1	0	NA	0	0	1	0	1	1	0	0	0	1	0	0	0	1	1	1	1	0	0	ecl
35	0	33	0	1	1	0	1	0	NA	0	0	0	1	1	1	1	1	0	0	1	0	0	0	1	0	1	0	1	ecl
61	0	32	1	1	1	1	1	0	NA	0	0	0	1	0	1	1	0	0	0	1	0	0	1	1	1	1	1	1	ecl
21	11	44	0	1	0	1	1	0	NA	1	0	1	0	0	1	0	0	1	1	0	0	0	0	0	0	0	0	0	ecl
282	0	23	2	1	1	1	0	0	NA	0	0	1	0	0	1	1	0	0	1	0	0	1	0	0	0	0	1	0	ecl
68	0	46	2	0	0	0	1	0	NA	0	1	0	0	0	1	0	0	0	0	0	0	0	0	0	0	0	0	0	ecl
50	0	46	2	1	0	1	1	0	NA	0	0	1	0	0	1	0	0	0	1	0	0	0	1	1	0	1	1	0	ecl
32	51	66	2	1	0	1	1	0	NA	0	0	0	0	1	0	0	0	0	0	0	0	0	1	1	1	1	0	0	ecl
24	0	22	0	0	0	1	1	0	NA	0	1	0	0	1	0	0	0	0	0	0	0	0	0	0	0	0	0	0	ecl
72	0	35	0	0	1	0	0	1	NA	0	0	1	0	0	1	0	0	0	1	0	0	0	1	1	0	1	1	1	ecl
191	0	35	1	1	0	0	1	0	NA	0	0	1	0	0	1	0	0	0	1	0	0	0	0	0	0	0	0	0	ecl
75	0	53	2	0	0	1	1	0	NA	0	0	1	1	0	1	1	1	0	1	1	0	0	1	1	1	1	1	1	ecl
30	0	28	0	0	0	0	1	0	NA	0	0	0	0	1	1	0	1	0	0	0	0	0	1	1	1	1	0	1	ecl
46	0	52	2	1	0	0	1	0	NA	0	0	1	0	0	0	0	0	0	1	0	1	0	0	0	0	0	0	0	ecl
29	0	13	0	1	0	1	1	0	NA	0	1	0	0	0	1	0	0	0	0	0	0	0	0	0	0	0	0	0	ecl
24	23	8	1	0	0	0	1	0	NA	1	1	0	0	0	0	0	0	0	0	0	0	0	0	0	0	0	0	0	ecl
45	0	34	2	1	0	1	1	0	NA	0	0	1	1	1	0	0	0	0	1	1	0	0	0	0	0	0	0	0	ecl
23	0	13	0	1	0	1	1	0	NA	0	1	0	0	0	1	0	0	0	0	0	0	0	0	0	0	0	0	0	ecl
30	15	56	0	0	0	1	1	0	NA	0	0	1	0	0	1	0	0	1	1	0	0	0	0	0	0	0	0	0	ecl
21	0	27	0	0	0	1	1	0	NA	0	0	1	0	1	0	0	0	0	1	0	0	0	0	0	0	0	0	0	ecl
24	14	31	2	1	0	1	1	0	NA	0	0	1	0	1	0	0	0	1	1	0	0	0	0	0	0	0	0	0	ecl
32	0	10	0	1	0	1	1	0	NA	0	0	0	0	0	0	0	0	0	0	0	0	0	0	0	0	0	0	0	ecl
82	0	1	2	0	0	0	1	0	NA	0	0	0	0	0	0	0	0	0	0	0	0	0	0	0	0	0	0	0	ecl
98	19	12	1	1	0	0	1	0	NA	0	0	1	0	0	0	0	0	1	1	0	0	0	0	0	0	0	1	0	ecl
29	0	28	2	1	0	0	1	0	NA	0	1	0	0	0	1	0	0	0	0	0	0	0	0	0	0	0	0	0	ecl
55	17	28	0	0	0	1	1	0	NA	0	0	1	0	0	1	0	0	1	1	0	0	0	0	1	0	1	1	0	ecl
27	12	28	0	0	0	1	1	0	NA	0	0	0	0	1	1	0	0	1	0	0	0	0	0	1	0	1	1	0	ecl
19	2	44	0	1	0	1	1	0	NA	0	0	0	0	1	1	0	0	1	0	0	0	0	0	0	0	0	0	0	ecl
24	7	44	0	1	0	1	1	0	NA	0	1	0	0	0	0	0	0	1	0	0	0	0	0	0	0	0	0	0	ecl
21	11	45	0	1	0	1	1	0	NA	0	1	0	0	0	0	0	0	1	0	0	0	0	0	0	0	0	0	0	ecl
22	4	19	0	1	0	1	1	0	NA	0	1	0	0	1	0	1	0	1	0	0	0	0	0	0	0	0	0	0	ecl
23	0	12	0	1	0	0	1	0	NA	1	1	0	0	0	0	0	0	0	0	0	0	0	0	0	0	0	0	0	ecl
33	0	47	1	1	0	1	1	0	NA	0	0	1	0	1	1	0	0	0	1	0	0	0	0	0	0	0	0	0	ecl
25	15	8	2	0	0	0	1	0	NA	1	0	1	0	0	0	0	0	1	1	0	0	0	0	0	0	0	0	0	ecl
143	7	49	0	0	0	1	1	0	NA	0	0	0	0	1	1	0	0	1	0	0	0	0	0	0	0	0	0	0	ecl
29	7	7	0	0	0	1	1	0	NA	0	1	0	0	0	1	0	0	1	0	0	0	0	0	0	0	0	0	0	ecl
29	7	7	0	0	0	1	1	0	NA	0	1	0	0	0	1	0	0	1	0	0	0	0	0	0	0	0	0	0	ecl
22	5	11	0	0	0	1	1	0	NA	0	1	0	0	0	1	0	0	1	0	0	0	0	0	0	0	0	0	0	ecl
28	0	16	0	1	0	1	1	0	NA	0	1	0	0	0	1	0	0	0	0	0	0	0	0	0	0	0	0	0	ecl
55	47	38	2	1	0	1	1	0	NA	0	0	1	1	0	1	0	0	1	1	1	0	0	0	0	0	0	0	0	ecl
32	9	53	0	0	0	1	1	0	NA	1	0	1	0	0	1	0	0	1	1	0	0	0	0	0	0	0	0	0	ecl
26	13	9	0	0	0	1	1	0	NA	0	1	0	0	0	1	0	0	0	0	0	0	0	0	0	0	0	0	0	ecl
22	14	6	0	1	0	1	1	0	NA	0	1	0	0	0	1	0	0	0	0	0	0	0	0	0	0	0	0	0	ecl
23	2	22	2	1	0	1	1	0	NA	0	0	1	0	1	0	0	0	0	1	0	0	0	0	1	0	1	0	0	ecl
14	11	29	0	1	0	1	1	0	NA	0	1	0	0	1	1	0	0	1	0	0	0	0	0	0	0	0	0	0	ecl
7	48	47	1	1	0	1	1	0	NA	1	0	1	0	1	1	0	0	1	1	0	0	0	0	0	0	0	0	0	ecl
23	9	19	2	0	0	1	1	0	NA	0	0	0	1	1	0	0	0	1	0	1	0	0	0	0	0	0	0	0	ecl
76	23	5	2	1	0	0	1	0	NA	0	0	0	0	0	0	0	0	1	0	0	0	0	0	0	0	0	0	0	ecl
22	16	34	2	1	0	1	1	0	NA	0	0	0	0	1	0	0	0	1	0	0	0	0	0	0	0	0	0	0	ecl
36	30	71	1	0	0	1	1	0	0	0	0	0	0	0	0	0	0	0	1	0	0	0	0	0	0	0	0	0	PA
30	24	45	1	1	0	0	1	0	0	0	1	0	0	0	0	0	0	0	0	0	0	0	0	0	0	0	0	0	PA
50	44	67	1	1	0	1	1	0	1	1	0	0	0	0	1	0	0	0	0	0	0	0	0	0	0	0	0	0	PA
37	33	61	0	1	0	1	1	0	1	1	1	0	0	0	1	1	0	1	0	1	1	1	0	1	0	0	0	0	PA
77	15	63	1	1	0	1	1	0	0	0	1	0	0	0	0	0	0	0	1	0	0	0	0	1	0	0	1	0	PA
38	25	25	1	0	0	0	1	0	0	0	0	0	0	0	0	0	0	1	0	0	0	0	0	0	0	0	0	0	PA
52	44	42	0	0	0	0	1	0	0	1	1	0	0	1	1	0	0	1	0	0	0	0	0	0	0	0	0	0	PA
29	20	50	1	0	0	1	1	0	0	0	0	0	0	0	0	0	0	0	0	0	0	0	0	0	0	0	0	0	PA
30	29	44	0	0	0	1	1	0	0	0	1	0	0	0	0	0	0	0	0	0	0	0	0	0	0	0	0	0	PA
33	15	36	1	0	0	1	1	0	0	0	0	0	0	0	0	0	0	0	0	0	0	0	0	0	0	0	0	0	PA
43	14	43	0	1	0	1	1	0	0	1	1	0	0	0	1	1	0	1	0	0	0	0	0	0	0	0	0	0	PA
48	44	37	1	0	0	1	1	0	0	1	1	0	0	0	1	0	0	0	1	0	0	1	0	1	0	0	0	0	PA
23	6	18	0	0	0	0	1	0	0	0	1	0	0	0	0	0	0	0	0	0	0	0	0	0	0	0	0	0	PA
24	16	39	0	0	0	1	1	0	0	0	0	0	0	0	1	0	0	0	0	1	0	1	0	0	0	0	0	0	PA
19	0	41	0	1	0	1	0	1	1	0	1	0	0	0	0	0	0	0	0	0	0	0	0	0	0	0	0	0	PA
24	9	23	0	1	0	1	1	0	0	0	1	0	0	0	1	0	0	0	1	0	0	0	0	0	0	0	0	0	PA
32	15	38	0	1	0	1	1	0	0	0	0	0	1	0	1	0	0	0	0	1	0	0	0	0	0	0	0	0	PA
21	8	48	0	0	0	1	1	0	0	0	0	0	0	0	1	0	0	0	0	0	0	0	0	0	0	0	0	0	PA
28	21	53	1	0	1	1	1	0	0	1	0	0	0	0	1	1	1	0	1	0	0	0	0	1	0	0	1	1	PA
25	14	54	0	0	0	1	1	0	0	0	1	0	0	0	0	0	0	0	0	0	0	0	0	0	0	0	0	0	PA
21	16	60	1	0	0	1	1	0	0	0	0	0	0	0	0	0	0	0	0	0	0	0	0	0	0	0	0	0	PA
28	13	50	0	0	0	1	1	0	0	1	1	0	0	0	1	0	0	1	0	0	0	0	0	0	0	0	0	0	PA
20	20	51	1	0	0	1	1	0	0	1	0	0	0	0	1	0	0	0	0	1	0	1	0	0	0	0	0	0	PA
22	15	17	0	1	0	0	1	0	0	0	0	0	0	0	1	0	0	0	0	0	0	0	0	0	0	0	0	1	PA
26	14	24	1	1	0	1	1	0	0	1	0	1	0	0	1	0	1	0	1	1	0	0	0	0	0	0	0	1	PA
34	30	25	1	1	1	1	1	0	0	0	0	0	1	0	0	0	1	0	1	1	0	1	1	1	0	0	1	1	PA
28	23	48	0	0	1	1	1	1	0	0	1	0	0	0	1	0	0	1	0	0	0	0	1	1	0	0	0	1	PA
22	12	39	1	1	0	1	1	0	0	0	0	0	0	0	0	0	0	0	0	0	0	0	0	0	0	0	0	0	PA
25	7	38	1	0	0	1	1	0	0	0	1	0	0	0	0	0	1	0	0	0	0	0	1	1	0	0	0	1	PA
33	30	35	2	1	0	1	1	0	0	1	1	1	0	0	1	0	0	0	1	0	0	1	0	1	0	0	0	0	PA
36	11	55	0	0	0	1	1	0	0	0	0	0	0	0	1	0	0	1	0	0	0	0	0	0	0	0	0	0	PA
24	7	54	0	0	0	0	1	0	0	1	1	1	0	0	1	0	0	0	1	0	0	0	0	0	0	0	0	0	PA
18	7	49	0	1	0	1	1	0	0	0	1	1	0	0	1	0	1	0	1	0	0	1	0	1	0	1	0	0	PA
197	0	54	0	0	1	1	0	0	0	1	1	0	0	0	1	1	0	0	0	0	0	0	1	1	0	0	0	1	PA
42	33	60	1	0	0	1	1	0	0	1	1	0	0	0	0	0	0	0	0	0	0	0	0	0	0	0	0	0	PA
49	15	38	0	1	0	0	1	0	0	1	1	0	0	0	1	0	0	1	0	0	0	0	0	0	0	0	0	0	PA
21	8	53	0	1	0	1	1	0	0	1	1	0	0	0	0	0	0	0	0	0	0	0	0	0	0	0	0	0	PA
26	11	56	0	1	0	1	1	0	0	0	1	0	0	0	1	0	0	0	0	0	0	0	0	0	0	0	0	0	PA
23	9	56	0	1	0	1	1	0	0	1	0	0	0	0	0	0	0	0	0	0	0	0	0	1	0	0	1	0	PA
39	63	42	1	1	0	1	1	0	0	1	1	0	0	0	0	1	0	0	0	0	0	0	0	0	0	0	0	0	PA
20	9	56	0	1	0	1	1	0	0	0	0	0	0	0	1	0	0	0	0	1	0	0	0	0	0	0	0	0	PA
21	9	40	0	0	0	1	1	0	0	0	0	0	0	0	1	0	0	0	0	0	0	0	0	0	0	0	0	0	PA
21	7	40	0	0	0	1	1	0	0	1	1	0	0	0	1	0	0	0	0	0	0	0	0	0	0	0	0	0	PA
23	11	18	0	1	0	0	1	0	0	1	1	1	0	0	0	0	0	0	1	0	0	0	0	0	0	0	0	0	PA
20	8	40	0	1	0	1	1	0	0	0	1	0	0	0	0	1	0	0	0	0	0	0	0	0	0	0	0	0	PA
26	16	42	2	0	0	0	1	0	0	1	0	0	0	0	0	0	0	0	0	0	0	0	0	0	0	0	0	0	PA
27	17	14	0	1	0	0	1	0	0	0	1	1	0	0	0	0	0	0	1	0	0	0	0	0	0	0	0	0	PA
22	22	13	0	1	0	1	1	0	0	0	1	0	0	0	0	0	0	0	0	0	0	0	0	0	0	0	0	0	PA
22	12	48	0	1	0	1	1	0	0	0	1	1	0	0	1	0	0	0	1	0	0	0	0	0	0	0	0	0	PA
35	9	48	0	1	0	1	1	0	0	1	1	0	0	0	1	0	0	0	0	0	0	0	0	0	0	0	0	0	PA
30	8	21	0	1	0	0	1	0	0	1	1	0	0	0	1	0	0	0	0	0	0	0	0	0	0	0	0	0	PA
20	10	51	0	1	0	1	1	0	0	0	1	0	0	0	1	0	0	0	1	0	0	0	0	0	0	0	0	0	PA
21	10	51	0	1	0	1	1	0	0	1	0	0	0	0	1	0	0	0	1	0	0	0	0	0	0	0	0	0	PA
28	20	41	2	0	0	1	1	0	0	1	1	0	0	0	0	0	0	0	0	0	0	0	0	0	0	0	0	0	PA
22	16	50	1	1	0	1	1	0	0	0	1	0	0	0	1	0	0	0	0	0	0	0	0	0	0	0	0	0	PA
24	7	43	0	1	0	1	1	0	0	0	1	0	0	0	0	0	0	0	0	0	0	0	0	0	0	0	0	0	PA
48	38	60	1	0	0	0	1	0	0	1	0	0	0	0	1	0	0	1	1	0	1	1	0	0	0	0	0	0	PA
83	47	32	1	1	1	0	1	0	0	0	0	0	0	1	1	0	1	1	1	1	0	1	0	1	0	1	0	1	PA
19	11	55	0	1	0	1	1	0	0	0	1	0	0	0	1	1	0	0	1	0	0	0	0	0	0	0	0	0	PA
24	17	47	2	1	0	1	1	0	0	1	1	0	0	0	0	0	0	0	0	0	0	0	0	1	0	1	1	0	PA
21	4	52	0	0	0	0	1	0	0	1	0	0	0	0	1	0	0	1	0	0	0	0	0	0	0	0	0	0	PA
32	21	23	2	1	0	0	1	0	0	1	0	0	1	0	0	0	0	1	0	1	0	0	0	0	0	0	0	0	PA
29	25	24	0	1	0	0	0	1	0	0	0	0	1	0	0	0	0	1	0	0	0	0	0	0	0	0	0	0	PA
21	9	27	0	0	0	1	1	0	0	1	1	0	0	0	1	0	0	0	0	0	0	0	0	0	0	0	0	0	PA
25	9	27	0	0	0	1	1	0	0	1	1	0	0	0	1	0	0	0	0	0	0	0	0	0	0	0	0	0	PA
44	0	55	1	1	0	1	1	0	0	1	1	0	0	0	1	0	1	0	1	0	0	1	0	0	0	0	0	0	PA
43	6	62	1	0	0	0	1	0	0	0	0	0	0	0	0	0	0	0	0	0	0	0	0	0	0	0	0	0	PA
30	11	28	1	1	0	1	1	0	0	1	1	1	0	0	1	0	0	1	1	1	0	0	0	0	0	0	0	0	PA
32	17	21	2	1	0	0	1	0	0	1	0	0	0	0	1	0	0	0	1	0	0	0	0	0	0	0	0	0	PA
22	13	49	1	0	1	1	1	0	0	1	1	0	0	0	1	0	1	0	0	0	0	0	0	0	0	0	0	1	PA
23	19	55	1	0	0	1	1	0	0	0	1	0	0	0	0	0	0	0	0	0	0	0	0	0	0	0	0	0	PA
33	0	45	2	1	0	1	0	0	0	0	1	1	0	0	0	0	0	0	1	0	0	0	0	0	0	0	0	0	PA
72	65	65	2	1	0	1	1	0	0	1	0	0	0	0	1	0	0	0	1	0	0	0	0	0	0	0	0	0	PA
23	20	47	2	0	0	1	1	0	0	1	1	0	0	0	0	0	0	0	1	0	0	0	0	0	0	0	0	0	PA
92	19	27	0	1	0	0	1	0	0	0	0	0	0	0	1	0	0	1	0	0	0	0	0	0	0	0	0	1	PA
29	13	48	0	0	0	0	1	0	1	1	1	0	0	0	1	0	0	0	0	0	0	0	0	0	0	0	0	0	PA
21	12	37	1	0	0	1	1	0	0	1	1	0	0	0	0	0	0	0	0	0	0	0	0	0	0	0	0	0	PA
5	5	31	0	0	0	1	0	1	0	0	1	0	0	0	0	0	0	0	0	0	0	0	0	0	0	0	0	0	PA
30	19	39	0	1	1	1	1	0	0	1	0	0	1	0	1	0	1	0	1	1	0	1	0	1	0	0	1	1	PA
23	9	28	0	1	0	1	1	0	0	1	0	0	1	0	1	1	0	0	0	1	0	0	0	0	0	0	0	0	PA
42	0	62	2	1	0	1	1	0	0	1	0	0	1	0	0	0	0	0	1	1	0	0	0	0	0	0	0	0	PA
29	17	49	2	1	0	0	1	0	0	1	1	1	0	0	0	0	0	0	1	0	1	0	0	0	0	0	0	0	PA
58	0	63	1	0	0	1	0	1	1	0	1	0	0	1	1	0	0	0	1	0	0	0	0	0	0	0	0	0	PA
25	10	56	0	0	0	1	1	0	1	1	1	0	0	0	1	1	0	0	1	0	0	0	0	0	0	0	0	0	PA
24	14	44	0	1	0	1	1	0	0	0	1	0	0	1	1	1	0	0	0	0	0	0	0	0	0	0	0	0	PA
22	8	17	0	1	0	1	1	0	0	0	0	0	1	0	1	0	0	0	1	0	0	0	0	0	0	0	0	0	PA
23	12	18	0	1	0	1	1	0	0	0	0	0	1	0	1	0	0	0	1	0	0	0	0	0	0	0	0	0	PA
61	27	43	0	1	1	1	1	0	0	0	1	1	0	1	1	1	1	0	1	0	0	1	0	0	0	1	0	1	PA
21	10	59	2	0	0	1	1	0	0	0	0	0	0	0	0	0	0	0	0	0	0	0	0	0	0	0	0	0	PA
22	7	39	0	0	0	1	1	0	0	0	0	0	0	0	0	0	0	0	0	0	0	0	0	0	0	0	0	0	PA
22	23	17	2	1	0	1	1	0	0	1	1	0	0	1	0	0	1	0	0	0	0	0	0	0	0	1	0	1	PA
17	5	52	0	1	0	1	1	0	1	0	0	0	0	0	1	0	0	0	0	0	0	0	0	0	0	0	0	0	PA
27	10	38	2	1	0	0	1	0	0	0	0	0	1	0	0	0	0	0	0	1	0	0	0	0	0	0	0	0	PA
20	17	55	1	1	0	1	1	0	0	1	1	0	0	0	0	0	0	0	0	0	0	0	0	0	0	0	0	0	PA
19	8	55	1	1	1	1	1	0	0	1	1	0	0	1	1	1	1	0	1	0	0	1	0	0	0	0	0	1	PA
23	13	53	2	1	0	1	1	0	0	1	1	0	0	0	0	0	0	0	0	0	1	0	0	0	0	0	0	1	PA
46	21	31	0	0	0	0	1	0	0	1	1	1	0	0	1	0	0	1	1	0	0	0	0	0	0	0	0	0	PA
18	13	45	2	0	0	0	1	0	0	0	1	0	0	0	0	0	0	0	0	0	0	0	0	0	0	0	0	0	PA
57	21	33	1	1	0	1	1	0	0	1	1	0	0	0	1	0	0	0	1	0	0	0	0	0	0	0	0	0	PA
52	20	42	0	0	0	1	1	0	0	0	1	1	0	0	1	0	0	1	1	0	0	0	0	0	0	0	0	0	PA
42	24	42	0	0	0	1	1	0	0	0	1	1	0	0	1	0	0	1	1	0	0	0	0	0	0	0	0	0	PA
25	9	38	0	1	0	1	1	0	0	0	0	0	0	0	1	0	0	0	0	0	0	0	0	0	0	0	0	0	PA
24	7	32	0	0	0	1	1	0	0	0	0	0	0	0	1	0	0	0	0	0	0	0	0	0	0	0	0	0	PA
22	10	46	0	1	0	1	1	0	0	1	1	0	0	0	1	0	0	0	0	0	0	0	0	0	0	0	0	0	PA
39	21	14	2	0	0	0	1	0	0	0	1	0	0	0	0	0	0	1	1	0	0	0	0	0	0	0	0	0	PA
39	21	14	2	0	1	0	1	0	0	0	1	0	0	0	1	0	0	0	1	0	0	0	0	0	0	0	0	1	PA
39	21	14	2	0	0	0	1	0	0	0	1	1	0	0	1	0	0	0	1	0	0	0	0	0	1	1	0	1	PA
25	13	29	0	1	1	0	1	0	0	0	1	0	0	1	1	1	0	1	0	0	0	1	0	1	0	0	1	1	PA
26	9	43	0	0	0	1	1	0	0	0	1	0	0	0	1	0	0	1	1	0	0	0	0	0	0	0	0	0	PA
30	12	49	0	1	1	1	1	0	0	0	1	0	0	0	1	0	0	0	0	0	0	0	0	0	0	0	0	1	PA
28	0	44	1	1	0	1	1	0	0	0	1	0	0	0	1	0	0	0	0	0	0	0	0	0	0	0	0	0	PA
26	0	51	2	1	0	1	0	0	0	0	1	1	0	0	0	0	0	0	1	0	0	0	0	0	0	0	0	0	PA
50	19	32	1	1	1	1	1	0	0	0	1	0	0	0	1	1	0	1	0	0	0	0	0	0	0	0	0	1	PA
25	19	38	0	0	0	1	0	1	0	0	0	0	1	0	1	0	1	0	0	1	0	0	0	0	0	0	0	1	PA
35	15	31	0	0	0	1	1	0	1	0	1	0	0	0	1	0	1	0	0	0	0	0	0	0	0	0	0	1	PA
28	13	34	0	1	0	1	1	0	0	0	1	0	0	0	0	0	0	0	0	0	0	0	0	0	0	0	0	0	PA
36	36	54	1	0	0	1	1	0	0	0	1	0	0	0	1	0	0	0	0	0	0	0	0	0	0	0	0	0	PA
42	26	30	2	0	0	0	1	0	0	1	0	0	0	0	1	0	0	0	0	0	0	0	0	0	0	0	0	0	PA
24	14	32	0	0	0	1	1	0	0	0	0	0	0	0	1	0	0	0	0	0	0	0	0	0	0	0	0	0	PA
14	0	35	1	1	0	1	0	1	0	1	1	0	0	0	1	0	0	0	0	0	0	0	0	0	0	0	0	0	PA
44	27	33	0	0	0	0	1	0	0	1	0	0	0	1	1	0	0	1	1	1	0	0	0	0	0	0	0	0	PA
28	12	50	0	1	1	1	1	0	0	0	0	0	0	0	1	0	0	0	1	0	0	0	0	1	0	1	1	1	PA
26	18	20	0	1	0	0	1	0	0	0	0	0	1	0	0	0	0	1	0	1	0	0	0	0	0	0	0	0	PA
21	11	21	0	1	0	1	1	0	0	0	0	0	0	0	1	0	0	0	0	1	0	0	0	0	0	0	0	0	PA
36	10	44	0	1	1	1	1	0	0	0	1	0	0	1	1	0	0	1	0	0	0	0	0	0	0	0	0	0	PA
40	15	24	0	0	0	1	1	0	0	1	1	0	0	0	1	0	0	0	0	0	0	0	0	0	0	0	0	0	PA
48	4	43	0	0	1	1	0	0	0	1	1	0	0	0	1	1	1	0	0	0	0	1	1	0	0	0	0	1	PA
65	11	49	0	1	0	0	0	1	0	0	1	0	0	0	1	0	0	1	1	0	0	0	0	0	0	0	0	0	PA
33	8	15	2	1	0	0	1	0	0	0	1	0	0	0	0	0	0	0	0	0	0	0	0	0	0	0	0	0	PA
24	23	48	2	1	0	0	1	0	0	1	0	0	0	0	0	0	0	1	0	0	0	0	0	0	0	0	0	0	PA
55	12	37	2	0	0	0	1	0	0	1	1	0	0	0	0	0	0	0	0	0	0	0	0	0	0	0	0	0	PA
39	12	53	0	0	0	1	1	0	0	0	1	0	0	1	1	0	0	1	0	0	0	0	0	0	0	0	0	0	PA
78	72	54	1	1	1	1	1	0	0	0	1	0	0	0	1	0	0	1	0	0	0	0	0	0	0	0	0	0	PA
76	20	47	0	1	0	1	0	1	0	0	1	0	0	1	0	0	0	0	0	0	0	0	0	0	0	0	0	0	PA
25	21	49	0	1	0	0	0	1	0	0	1	0	0	0	1	0	0	0	0	0	0	0	0	0	0	0	0	0	PA
26	37	42	0	0	0	1	1	0	0	0	1	0	0	0	1	0	0	1	0	0	0	0	0	0	0	0	0	0	PA
17	3	24	0	1	0	0	1	0	0	0	0	0	0	0	0	0	0	0	0	0	0	0	0	0	0	0	0	0	PA
38	23	62	2	1	0	0	1	0	0	1	1	1	0	1	0	0	1	1	1	0	0	1	1	1	0	0	1	1	PA
63	21	43	1	1	1	1	1	0	0	0	0	0	1	0	1	1	0	1	0	1	0	0	1	1	0	0	1	1	PA
23	7	65	0	0	0	1	1	0	0	0	1	1	0	0	0	0	0	0	1	0	0	0	0	0	0	0	0	0	PA
28	13	46	0	0	0	1	1	0	0	0	1	0	0	0	0	1	0	1	0	0	0	0	0	0	0	0	0	0	PA
20	22	18	2	1	0	0	1	0	0	1	1	0	0	0	0	0	0	1	0	0	0	0	0	0	0	0	0	0	PA
24	8	24	0	0	0	1	1	0	0	0	0	0	0	0	1	0	1	0	0	0	0	0	0	0	0	0	0	0	PA
62	8	56	1	0	0	1	1	0	0	1	1	0	0	0	0	0	0	0	0	0	0	0	0	0	0	0	0	0	PA
29	21	52	1	0	0	1	1	0	0	1	0	0	0	0	0	0	1	1	0	0	0	0	0	0	0	0	0	1	PA
18	4	62	0	1	0	1	1	0	0	1	1	0	0	1	1	0	0	0	0	0	0	0	0	0	0	0	0	0	PA
24	12	26	0	1	0	0	1	0	0	1	1	0	0	0	0	0	0	1	0	0	0	0	0	0	0	0	0	1	PA
29	21	48	1	1	0	0	1	0	0	0	0	0	0	0	0	0	0	0	0	0	0	0	0	0	0	0	0	0	PA
38	16	33	1	1	0	0	1	0	0	0	0	0	0	0	0	0	0	1	0	0	0	0	0	0	0	0	0	0	PA
24	14	44	0	0	0	1	1	0	0	0	1	0	0	0	0	1	0	0	0	0	0	0	0	0	0	0	0	0	PA
19	5	39	0	1	0	1	1	0	0	0	0	0	0	0	1	0	0	1	0	0	0	0	0	0	0	0	0	0	PA
21	4	74	0	0	0	1	1	0	0	0	1	0	0	1	0	0	0	0	0	0	0	0	0	0	0	0	0	0	PA
21	5	30	0	0	0	1	1	0	0	0	1	0	0	1	0	0	0	0	0	0	0	0	0	0	0	0	0	0	PA
21	7	48	1	1	0	1	1	0	0	0	0	0	0	0	1	1	0	0	0	0	0	0	0	0	0	0	0	0	PA
32	13	54	0	0	0	1	1	0	0	1	0	0	0	0	0	0	0	0	0	0	0	0	0	0	0	0	0	0	PA
25	14	39	0	0	0	1	1	0	0	0	1	0	0	1	1	0	0	0	0	0	0	0	0	0	0	0	0	1	PA
29	28	55	1	0	1	1	1	0	0	1	1	1	0	0	1	1	1	1	1	0	0	1	0	1	0	0	1	1	PA
19	7	24	0	1	0	1	1	0	0	0	1	0	0	0	1	0	0	0	0	0	0	0	0	0	0	0	0	0	PA
30	26	59	2	0	0	0	1	0	0	0	0	0	0	0	1	0	0	1	0	0	0	0	0	0	0	0	0	0	PA
34	14	38	0	0	0	1	1	0	0	1	1	0	0	1	1	0	0	0	0	0	0	0	0	1	0	0	0	1	PA
25	0	27	0	1	0	0	0	1	0	0	0	0	0	0	0	1	0	0	1	0	1	0	0	0	0	0	0	0	PA
30	24	50	0	1	0	0	0	1	0	1	1	1	0	0	1	0	0	1	1	0	0	0	0	0	0	0	0	0	PA
80	1	53	0	1	0	1	1	0	0	1	1	0	0	1	1	0	1	0	0	0	1	1	0	0	0	0	0	0	PA
95	0	40	0	1	1	0	0	0	0	1	1	0	0	0	1	1	0	0	1	0	0	0	0	0	0	0	0	0	PA
26	6	46	0	1	0	1	1	0	0	1	1	0	0	0	1	0	0	0	0	0	0	0	0	0	0	0	0	1	PA
48	17	46	1	0	0	1	1	0	0	1	1	0	0	0	1	0	1	0	0	0	0	0	0	0	0	0	0	1	PA
27	0	39	0	1	0	1	0	0	0	1	1	0	0	0	0	1	0	0	0	0	0	0	0	0	0	0	0	0	PA
22	5	52	0	1	0	1	1	0	0	0	1	0	0	0	1	0	0	1	0	0	0	0	0	0	0	0	0	1	PA
26	1	33	0	0	1	0	1	0	0	0	1	0	0	1	1	0	1	1	0	0	0	0	1	0	1	1	0	1	PA
49	1	20	0	0	0	0	1	0	0	0	1	0	0	0	0	0	0	1	0	0	0	0	0	0	0	0	0	0	PA
24	12	17	0	1	0	0	0	1	0	1	1	0	0	0	1	0	0	1	0	1	0	0	1	0	1	1	0	0	PA
27	4	45	0	1	0	1	0	1	0	1	1	0	0	0	0	0	0	1	0	0	0	0	0	0	0	0	0	0	PA
25	1	45	0	1	0	1	0	1	0	0	1	0	0	0	1	0	0	1	0	0	0	0	0	1	0	0	1	1	PA
25	1	29	0	0	0	0	1	0	0	1	1	0	0	1	0	0	0	1	0	0	0	0	0	0	0	0	0	0	PA
32	6	38	0	1	0	0	0	1	0	0	1	0	0	1	1	1	0	1	0	0	0	0	0	0	0	0	0	0	PA
21	9	58	1	1	0	1	1	0	0	1	1	0	0	0	0	0	0	0	1	0	0	0	0	0	0	0	0	0	PA
38	20	34	1	1	0	1	1	0	0	0	1	0	0	0	0	0	0	1	0	0	0	0	0	0	0	0	0	0	PA
54	1	60	1	1	0	1	1	0	0	1	0	0	0	0	0	0	0	1	1	0	0	0	0	0	0	0	0	0	PA
21	10	43	2	1	0	0	1	0	0	1	1	0	0	0	1	0	0	1	0	0	0	0	0	0	0	0	0	0	PA
25	1	50	0	0	0	1	1	0	0	1	0	0	0	1	1	0	0	1	0	0	0	0	0	0	0	0	0	0	PA
23	9	39	2	0	0	1	1	0	0	0	1	0	0	0	0	0	0	1	0	0	0	0	0	0	0	0	0	0	PA
28	5	48	0	0	0	1	1	0	1	0	0	0	0	1	0	1	0	1	1	0	0	0	0	0	0	0	0	0	PA
26	7	23	0	1	0	0	1	0	0	1	0	0	0	1	1	0	0	1	0	0	0	0	1	0	0	1	0	0	PA
34	20	27	2	0	0	0	1	0	0	0	0	0	0	1	1	1	0	1	0	0	0	0	0	0	0	0	0	1	PA
23	4	38	0	1	0	1	1	0	0	0	1	0	0	0	1	0	0	1	0	0	0	0	0	0	0	0	0	0	PA
22	4	44	0	0	0	1	1	0	0	0	1	0	0	0	0	0	0	1	0	0	0	0	0	0	0	0	0	0	PA
6	0	66	2	1	0	1	0	0	0	0	1	0	0	0	0	0	1	1	1	0	0	1	0	0	0	0	0	0	PA
30	3	56	0	0	0	0	1	0	0	0	1	0	0	0	0	0	0	0	0	0	0	0	0	0	0	0	0	1	PA
40	2	26	1	0	1	1	1	0	0	0	1	0	0	1	1	0	0	1	1	1	0	0	0	0	0	0	0	1	PA
30	4	28	0	1	0	1	1	0	0	0	1	0	0	1	0	0	0	1	0	0	0	0	1	0	0	0	0	0	PA
19	2	33	0	1	0	1	1	0	0	0	1	0	0	0	0	0	0	1	0	0	0	0	0	0	0	0	0	0	PA
32	4	33	0	1	0	0	1	0	0	0	1	0	0	0	0	0	0	1	0	0	0	0	0	0	0	0	0	0	PA
104	0	39	1	0	0	1	1	0	0	1	1	0	0	1	1	1	0	0	0	0	0	0	1	0	0	1	0	1	PA
94	67	26	1	0	1	1	1	0	0	0	0	0	1	1	1	0	0	1	1	1	0	0	0	0	0	0	0	1	PA
32	2	41	0	0	0	1	1	0	0	0	1	0	0	0	1	0	0	1	0	0	0	0	0	0	0	0	0	1	PA
79	4	43	0	0	0	0	1	0	0	0	1	0	0	1	1	1	0	0	0	0	0	0	0	0	0	0	0	0	PA
30	2	33	0	0	0	1	1	0	0	0	1	0	0	0	0	0	0	1	0	0	0	0	0	0	0	0	0	0	PA
35	10	26	0	0	0	1	1	0	0	0	0	0	0	1	1	0	0	1	0	0	0	0	0	0	0	0	0	0	PA
89	0	55	0	0	0	1	0	0	0	1	1	0	0	1	1	1	0	0	1	0	0	0	0	0	0	0	0	1	PA
28	1	38	0	0	0	1	1	0	1	0	1	0	0	0	1	0	1	1	0	0	0	0	0	0	0	0	0	1	PA
40	2	28	0	1	0	0	1	0	0	0	0	0	0	0	1	0	0	1	1	0	0	0	0	0	0	0	0	0	PA
30	16	47	2	1	0	1	1	0	0	1	0	0	1	0	1	0	0	0	0	0	0	0	0	0	0	0	0	0	PA
24	4	36	0	1	0	0	1	0	1	1	1	0	0	0	0	0	0	1	0	0	0	0	0	0	0	0	0	0	PA
27	3	56	0	1	0	1	1	0	0	1	1	0	0	0	0	0	0	1	0	0	0	0	0	0	0	0	1	1	PA
35	2	25	1	1	0	0	1	0	0	0	1	0	0	0	0	0	1	1	0	0	0	1	0	0	0	0	0	1	PA
26	4	50	0	1	0	1	1	0	0	1	1	0	0	0	0	0	0	1	1	0	0	0	0	0	0	0	0	0	PA
29	7	48	0	0	0	1	1	0	0	1	1	0	0	0	0	0	0	1	0	0	0	0	0	0	0	0	0	0	PA
39	6	54	0	1	0	1	1	0	0	0	1	0	0	0	1	0	0	1	0	0	0	0	0	0	1	1	0	0	PA
80	41	32	1	1	0	1	1	0	0	0	1	0	0	0	1	0	0	0	1	0	0	1	0	0	0	0	0	1	PA
16	2	59	0	1	1	1	1	0	1	0	1	0	0	0	0	1	0	0	0	0	0	0	0	0	0	0	0	0	PA
25	10	51	0	1	0	1	1	0	1	0	1	0	0	0	1	1	0	1	0	0	0	0	0	0	1	0	0	1	PA
29	3	57	0	0	0	1	1	0	0	0	1	0	0	0	0	0	0	1	0	0	0	0	0	0	0	0	0	0	PA
26	3	58	0	0	0	1	1	0	0	0	1	0	0	0	1	0	1	1	0	0	0	0	0	0	0	0	1	1	PA
32	2	29	0	0	0	0	1	0	0	1	1	0	0	1	0	0	0	1	1	0	0	0	0	0	0	0	0	0	PA
41	8	57	2	0	0	0	1	0	1	0	1	0	0	0	1	0	0	1	0	0	0	0	0	0	0	0	0	1	PA
7	4	34	0	1	0	1	1	0	0	0	1	0	0	1	1	0	0	1	0	0	0	0	0	0	0	0	0	0	PA
31	11	52	1	1	0	1	1	0	0	0	1	0	0	0	1	0	0	1	0	0	0	0	0	0	1	0	1	0	PA
20	2	48	0	1	0	0	1	0	0	1	1	0	0	0	0	0	1	1	1	0	0	1	0	0	0	0	0	1	PA
26	12	59	2	0	0	1	1	0	0	0	1	0	0	0	0	0	1	1	0	0	0	0	0	0	0	0	0	1	PA
26	4	42	2	1	0	0	1	0	0	1	1	0	0	0	0	0	0	1	1	0	1	1	0	0	0	0	0	1	PA
33	21	42	2	0	0	0	1	0	0	0	1	0	0	0	0	0	0	1	0	0	1	0	0	0	0	0	0	0	PA
25	2	15	0	0	0	0	1	0	0	0	1	0	0	0	1	0	0	1	0	0	0	0	0	0	0	0	0	0	PA
19	8	47	0	1	0	1	1	0	1	0	0	0	1	0	1	0	0	1	0	1	0	0	0	0	0	0	0	1	PA
36	9	14	1	0	0	0	1	0	0	1	0	0	1	1	1	1	1	1	1	0	0	1	0	0	0	0	0	1	PA
30	5	23	0	0	0	0	1	0	0	1	0	1	0	0	0	0	0	1	0	0	0	0	0	0	0	0	0	0	PA
64	6	67	1	1	1	1	1	0	0	1	0	1	0	0	1	0	0	1	0	0	0	0	1	1	0	0	0	1	PA
36	7	41	0	0	0	1	0	0	1	0	0	1	0	1	1	1	0	1	0	0	0	0	0	0	0	0	0	0	PA
28	5	40	2	0	0	1	0	0	0	1	0	1	0	0	1	0	0	1	0	0	0	0	0	0	0	0	0	0	PA
34	30	14	2	1	0	1	1	0	0	0	0	0	1	0	1	0	0	1	1	0	0	0	0	0	0	0	0	0	PA
28	15	47	0	1	1	0	1	1	0	1	0	1	0	1	1	0	0	1	0	1	1	0	1	1	1	0	1	1	PA
22	3	7	0	0	0	1	0	0	0	0	1	0	0	0	0	0	0	0	0	0	0	0	0	0	0	0	0	0	PA
77	0	28	0	1	0	0	1	1	0	1	0	0	1	0	1	0	1	0	0	0	0	0	0	0	0	0	0	0	PA
31	2	46	0	0	0	1	0	0	0	1	0	0	1	0	1	0	0	1	0	0	0	0	0	0	0	0	0	0	PA
14	8	45	0	1	0	0	1	0	0	1	0	1	0	0	0	0	0	1	1	0	1	1	1	0	1	1	0	0	PA
24	4	18	0	1	0	1	1	0	0	0	0	1	0	0	1	0	0	1	0	0	0	0	0	0	0	0	0	0	PA
31	5	36	0	1	0	1	0	0	0	0	0	1	0	0	0	0	0	1	1	0	0	0	0	0	0	0	0	0	PA
52	0	21	0	0	0	0	1	1	0	0	0	1	0	0	0	0	0	0	0	0	0	0	0	0	0	0	0	0	PA
22	2	37	0	1	0	1	1	0	0	0	0	1	0	0	1	0	0	1	0	0	0	0	0	0	0	0	0	0	PA
31	2	19	0	1	0	1	1	0	0	0	0	0	1	1	1	0	0	1	0	0	0	0	0	0	0	0	0	0	PA
19	2	13	0	0	0	0	1	0	0	1	0	1	0	0	0	0	0	1	0	0	0	0	0	0	0	0	0	0	PA
25	9	60	2	1	0	1	1	0	0	1	0	1	0	0	0	0	0	1	1	0	0	0	0	0	0	0	0	0	PA
20	2	37	0	1	0	1	1	0	0	0	0	0	1	0	1	0	0	1	0	0	0	0	0	0	0	0	0	0	PA
32	3	59	0	1	0	1	1	0	1	0	0	0	1	0	1	0	0	1	0	0	0	0	0	0	0	0	0	0	PA
40	20	46	1	1	1	1	0	1	0	1	0	1	0	0	0	0	0	1	0	0	0	0	0	0	0	0	0	0	PA
18	1	16	0	1	0	0	1	0	0	0	0	1	0	0	1	0	0	1	0	0	0	0	0	0	0	0	0	0	PA
21	8	59	0	1	0	1	1	0	0	0	0	1	0	0	1	0	0	1	0	0	0	0	0	0	0	0	0	0	PA
25	10	38	0	0	0	1	1	0	0	0	0	1	0	1	0	0	0	1	0	0	0	0	0	0	0	0	0	0	PA
20	4	43	0	0	0	1	0	0	0	1	1	0	0	0	1	0	0	1	0	0	0	0	0	0	0	0	0	0	PA
52	7	55	1	0	1	0	1	1	0	1	0	0	1	1	1	0	1	1	0	1	1	0	1	0	1	1	0	1	PA
35	10	20	1	1	0	0	1	0	1	0	1	0	0	1	1	0	0	1	0	0	0	0	0	0	0	0	0	0	PA
83	10	55	1	0	1	1	1	0	0	1	0	1	0	1	1	0	0	1	1	0	0	0	1	1	1	1	0	1	PA
35	0	34	0	0	0	0	1	0	0	0	0	0	1	1	1	0	0	1	0	1	1	0	0	0	0	0	0	0	PA
83	10	55	1	0	1	1	0	0	0	1	1	0	0	1	1	1	0	1	1	1	0	0	1	1	1	1	1	1	PA
70	0	43	1	1	0	0	0	0	0	1	1	0	0	0	1	1	0	1	0	1	1	0	0	0	0	0	0	0	PA
43	20	54	2	0	0	1	0	0	0	1	1	0	0	1	1	0	0	1	0	0	0	0	0	0	0	0	0	0	PA
25	15	26	0	1	1	0	1	1	0	0	1	0	0	1	1	0	0	1	1	0	0	0	1	1	0	0	1	1	PA
48	11	48	1	1	0	0	1	0	0	0	1	0	0	0	1	0	0	1	0	1	0	0	0	0	0	0	0	0	PA
26	2	33	1	0	0	1	1	0	0	0	0	0	0	0	0	0	0	0	0	1	0	0	0	0	0	0	0	0	PA
87	20	3	1	1	0	0	1	1	0	0	1	0	0	0	1	1	0	1	0	0	1	0	0	0	0	0	0	1	PA
11	2	40	0	0	0	1	1	0	0	0	1	0	0	1	1	0	0	0	0	0	0	0	0	0	0	0	0	0	PA
89	7	37	0	1	0	1	1	0	0	0	0	1	0	0	1	0	0	1	0	0	0	0	0	0	0	0	0	0	PA
76	8	38	1	0	1	1	1	0	0	1	0	1	0	1	1	0	0	0	1	0	0	0	0	0	0	0	0	0	PA
24	10	18	2	1	0	0	1	0	0	1	1	0	0	0	0	0	0	1	0	0	0	0	0	0	0	0	0	0	PA
35	5	17	0	1	0	0	1	0	0	0	0	0	0	1	1	0	1	1	0	0	0	0	0	0	0	0	0	1	PA
29	1	16	0	1	0	1	1	0	0	1	1	0	0	0	0	0	0	1	0	0	0	0	0	0	0	1	0	0	PA
76	10	38	0	0	0	1	0	0	0	1	1	0	0	1	1	0	0	1	1	1	0	0	1	0	0	1	0	0	PA
10	11	47	1	1	0	1	1	0	0	0	0	0	1	0	1	0	0	1	1	1	1	1	0	0	0	0	0	0	PA
12	7	34	0	1	0	1	1	0	0	1	0	0	0	0	1	0	0	1	0	1	0	0	0	0	0	0	0	0	PA
73	7	14	2	1	0	1	0	0	0	0	0	1	0	0	0	0	0	1	0	0	0	0	1	0	1	0	0	0	PA
25	9	6	0	0	0	1	1	0	0	0	1	0	0	0	1	0	0	1	0	0	0	0	0	0	0	0	0	0	PA
28	7	54	1	1	0	1	1	0	0	1	0	1	0	0	1	0	0	1	0	0	0	0	0	0	0	0	0	0	PA
37	7	15	1	1	0	1	1	1	0	0	0	0	1	0	1	1	0	1	1	1	0	0	0	1	0	0	1	1	PA
17	7	18	1	1	0	0	1	0	0	1	1	0	0	0	1	1	0	1	0	0	0	0	0	0	0	0	0	0	PA
22	2	49	0	1	0	1	1	0	0	1	0	0	0	0	1	0	0	1	0	0	0	0	0	0	0	0	0	0	PA
8	7	46	0	0	0	1	1	0	0	1	1	0	0	0	1	0	0	1	0	0	0	0	0	0	0	0	0	0	PA
27	7	18	1	0	0	1	0	1	0	1	1	0	0	0	0	0	1	1	0	0	0	0	0	0	0	0	0	1	PA
44	5	54	1	1	0	1	1	0	0	1	0	0	1	0	1	0	1	1	1	1	0	1	0	0	0	0	0	1	PA
18	7	62	0	1	0	1	0	0	0	0	1	0	0	0	0	0	0	1	0	0	0	0	0	0	0	0	0	1	PA
25	2	23	0	0	0	1	1	0	0	1	1	0	0	0	1	0	0	0	0	0	0	0	0	0	0	0	0	0	PA
31	4	34	0	0	0	1	1	0	0	1	0	0	0	0	0	0	0	1	0	0	0	0	0	0	0	0	0	0	PA
50	1	6	2	0	0	1	0	0	0	1	1	0	0	0	1	0	0	1	0	0	0	0	0	0	0	0	0	0	PA
22	3	16	1	0	0	1	1	0	0	0	0	0	0	0	1	0	0	1	0	1	0	0	0	1	0	0	1	0	PA
21	7	34	0	1	0	1	1	0	0	0	0	0	0	1	1	0	0	1	0	0	0	0	0	0	0	0	0	0	PA
24	0	58	0	1	0	0	0	0	0	0	1	0	0	0	0	0	0	1	0	0	0	0	0	0	0	0	0	0	PA
82	0	48	1	1	0	1	1	0	0	0	0	0	1	0	0	0	0	0	0	1	0	0	0	0	0	0	0	0	PA
44	8	30	0	1	0	1	1	1	0	0	1	0	0	0	1	0	0	0	0	0	0	0	0	0	0	0	0	0	PA
23	1	43	0	0	0	1	0	0	0	0	1	0	0	0	1	0	0	0	0	0	0	0	0	0	0	0	0	0	PA
20	1	28	0	1	0	0	0	0	0	0	1	0	0	1	0	0	0	1	0	0	0	0	0	0	0	0	0	0	PA
95	15	19	1	1	1	1	1	1	0	1	0	0	0	0	1	1	1	1	1	0	0	1	1	1	0	0	1	1	PA
24	5	57	0	1	0	1	1	0	0	0	0	0	0	1	1	0	0	1	0	0	0	0	0	0	0	0	0	0	PA
41	13	35	1	0	0	0	1	0	0	1	0	0	0	0	1	0	0	0	0	0	0	0	0	0	0	0	0	0	PA
23	3	42	0	0	0	1	1	0	0	0	1	0	0	0	1	0	0	0	0	0	0	0	0	0	0	0	0	0	PA
30	13	38	0	0	0	0	1	1	0	1	0	0	1	0	1	0	0	1	0	1	0	0	0	0	0	0	0	0	PA
29	5	22	1	0	0	0	1	0	0	1	1	0	0	1	0	0	0	1	0	0	0	0	0	0	0	0	0	0	PA
119	0	55	0	1	0	1	0	1	1	1	0	0	0	0	1	0	0	0	0	0	0	0	1	1	1	0	1	0	PA
57	8	13	2	1	0	0	1	0	0	1	0	0	0	0	0	0	0	0	0	0	0	0	1	1	0	0	0	0	PA
20	5	32	0	1	0	1	1	0	1	0	1	0	0	1	0	0	0	1	0	0	0	0	0	0	0	0	0	0	PA
33	14	63	2	0	0	1	1	0	0	1	0	0	0	0	1	0	0	1	0	0	0	0	0	0	0	0	0	1	PA
12	6	45	0	1	0	1	1	0	0	1	1	0	0	0	0	0	0	0	0	0	0	0	0	0	0	0	0	0	PA
31	7	32	0	1	0	1	1	0	0	0	0	1	0	1	1	1	0	1	1	0	0	0	0	0	0	0	0	0	PA
30	13	32	2	1	0	0	1	0	0	1	0	0	0	0	0	0	0	0	1	1	0	0	0	0	0	0	0	0	PA
49	2	49	0	1	0	1	1	0	0	1	0	0	0	0	0	0	0	1	1	1	0	1	0	0	0	0	0	0	PA
21	8	8	0	1	0	1	0	0	0	0	1	0	0	0	1	0	0	1	0	0	0	0	0	0	0	0	0	0	PA
45	8	14	0	1	0	1	0	1	0	0	1	0	0	1	1	1	0	1	0	0	0	0	0	0	0	0	0	1	PA
28	30	36	1	1	1	1	1	1	1	1	0	0	0	1	1	1	0	1	1	1	1	0	1	1	1	0	1	1	PA
22	2	37	0	1	0	1	0	0	0	0	1	0	0	0	0	0	0	1	0	0	0	0	0	0	0	0	0	0	PA
43	1	73	1	0	1	1	0	0	0	1	1	0	0	0	1	0	0	1	0	0	0	0	1	1	0	0	0	1	PA
25	7	33	1	0	0	1	1	0	0	0	1	0	0	1	1	0	0	1	0	0	0	0	0	0	0	0	0	0	PA
49	30	75	0	1	0	1	1	0	0	1	1	0	0	0	1	0	0	1	1	0	0	0	0	0	0	0	0	0	PA
24	7	31	0	0	1	1	0	0	0	1	0	0	1	0	0	0	0	1	0	1	0	0	0	0	0	0	0	1	PA
22	15	56	1	0	0	0	1	0	0	1	1	0	0	0	1	0	0	1	0	0	0	0	0	0	0	0	0	0	PA
8	2	63	0	1	0	1	1	0	1	0	1	0	0	0	0	0	0	1	0	0	0	0	0	0	0	0	0	0	PA
51	21	42	1	0	0	1	1	0	0	0	0	1	0	0	0	1	0	1	1	0	0	0	0	0	0	0	0	0	PA
58	10	37	1	1	0	1	1	0	0	0	0	0	0	0	1	0	1	1	1	0	0	1	0	1	0	0	1	0	PA
29	6	34	0	1	0	1	0	0	0	1	1	0	0	0	1	0	0	0	0	0	0	0	0	0	0	0	0	0	PA
27	15	59	1	0	0	1	0	0	0	0	1	0	0	0	0	0	0	1	1	0	0	0	0	0	0	0	0	0	PA
23	8	22	2	1	0	1	1	0	0	1	0	0	1	0	0	0	0	1	0	0	0	0	0	0	0	0	0	0	PA
8	10	37	1	1	0	1	0	0	0	0	0	0	0	0	1	0	0	0	1	0	0	1	0	1	0	0	1	0	PA
14	3	33	0	1	0	1	1	0	1	1	0	1	0	0	0	0	0	1	0	0	0	0	0	0	0	0	0	0	PA
37	3	51	0	0	0	1	0	0	0	0	1	0	0	0	1	0	0	0	0	0	0	0	0	0	0	0	0	0	PA
45	7	48	0	0	0	1	0	0	0	0	1	0	0	0	1	0	0	1	0	0	0	0	0	0	0	0	0	0	PA
45	5	20	0	1	0	0	1	0	0	1	0	0	0	0	0	0	1	1	0	0	0	0	0	0	0	0	0	1	PA
21	7	35	0	1	0	0	1	0	0	0	1	0	0	0	0	0	0	1	0	0	0	0	0	0	0	0	0	0	PA
21	2	32	1	0	0	1	1	0	0	1	0	0	0	0	0	0	0	1	0	0	0	0	0	0	0	0	0	0	PA
10	1	38	0	0	0	1	0	0	0	1	1	0	0	0	1	0	0	0	0	0	0	0	0	0	0	0	0	0	PA
22	6	17	0	0	0	1	1	0	0	0	1	0	0	1	0	0	0	0	0	0	0	0	0	0	0	0	0	0	PA
25	12	53	1	0	0	1	1	0	0	0	0	1	0	0	0	0	0	1	1	0	0	0	0	0	0	0	0	0	PA
31	5	17	0	1	0	0	1	0	0	1	0	0	1	0	1	1	0	1	1	1	0	0	0	0	0	0	0	0	PA
11	15	13	1	1	0	1	0	0	0	1	0	0	0	0	1	0	0	1	0	0	0	0	0	0	0	0	0	0	PA
29	11	48	0	1	0	0	1	0	0	1	0	0	0	0	1	0	0	0	1	1	0	1	0	0	0	0	0	0	PA
150	23	52	1	0	1	1	1	1	0	1	0	0	1	0	1	1	0	1	0	1	0	0	0	0	0	0	0	1	PA
28	10	15	0	0	0	0	1	1	0	0	1	0	0	0	0	0	0	1	0	0	0	0	0	0	0	0	0	0	PA
22	2	37	0	1	0	0	1	0	0	0	1	0	0	0	0	0	0	1	0	0	0	0	0	0	0	0	0	0	PA
35	15	27	1	1	0	0	1	1	0	0	0	1	0	1	1	0	0	0	1	0	0	1	0	0	0	0	0	0	PA
64	30	43	1	1	0	0	1	0	0	1	0	0	0	1	0	0	0	1	1	0	1	0	0	0	0	0	0	0	PA
17	7	34	0	0	0	1	1	0	0	1	0	1	0	0	1	0	0	1	0	0	0	0	0	0	0	0	0	0	PA
57	0	5	1	0	0	0	1	0	0	1	1	0	0	0	0	0	0	0	0	0	0	0	0	0	0	0	0	0	PA
22	5	17	0	1	0	0	0	1	0	1	0	1	0	0	1	1	0	1	1	0	0	0	0	0	0	0	0	1	PA
20	2	50	0	1	0	1	0	0	0	1	1	0	0	0	1	1	0	0	0	0	0	0	0	0	0	0	0	0	PA
19	0	51	1	0	0	1	1	0	0	0	0	0	1	0	1	0	0	0	0	1	0	0	0	0	0	0	0	0	PA
30	15	31	0	1	1	0	1	1	0	1	1	0	0	0	1	0	0	1	0	1	0	0	1	1	0	1	1	1	PA
120	30	36	0	1	0	0	1	1	0	0	1	0	0	0	1	1	0	1	0	0	1	0	0	0	0	0	0	1	PA
25	10	13	0	1	0	1	1	0	0	0	1	0	0	0	1	0	0	1	0	0	0	0	0	0	0	0	0	0	PA
59	20	7	2	0	0	0	0	0	0	1	0	0	1	0	0	0	0	0	0	1	0	0	0	0	0	0	0	0	PA
41	2	18	2	1	0	0	1	0	0	1	1	0	0	0	0	0	0	0	0	0	0	0	1	0	0	0	0	0	PA
14	10	33	2	1	0	1	1	0	0	1	0	0	1	1	0	0	1	1	1	1	1	1	0	0	0	0	0	0	PA
43	3	57	1	0	0	1	1	0	0	1	0	1	0	0	1	0	0	0	1	0	0	1	0	0	0	0	0	0	PA
14	2	56	1	0	0	1	1	0	0	1	0	1	0	1	1	0	0	1	1	0	0	0	0	0	0	0	0	0	PA
5	0	14	0	1	0	1	1	0	0	1	1	0	0	0	1	0	0	0	0	0	0	0	0	0	0	0	0	0	PA
25	4	36	0	0	0	1	1	0	0	0	0	0	0	0	1	1	0	1	0	0	0	0	0	0	0	0	0	0	PA
22	3	28	1	0	0	1	1	0	0	0	1	0	0	0	0	0	0	1	0	0	0	0	0	0	0	0	0	0	PA
13	7	55	0	1	0	1	0	0	0	0	0	1	0	0	1	0	0	1	1	0	0	0	0	0	0	0	0	0	PA
23	2	52	0	0	0	1	1	0	0	1	1	0	0	1	1	1	0	1	0	0	0	0	0	0	0	0	0	0	PA
29	7	36	1	0	0	0	1	0	0	1	0	1	0	1	1	0	0	0	1	0	0	0	0	0	0	0	0	1	PA
36	4	36	0	1	0	1	0	0	0	0	1	0	0	0	0	0	0	0	0	0	0	0	0	0	0	0	0	0	PA
31	8	50	0	0	0	1	1	0	0	1	1	0	0	1	1	0	0	1	0	0	0	0	1	0	1	1	0	0	PA
27	3	40	0	0	0	1	1	0	0	0	1	0	0	0	1	0	0	1	0	0	0	0	0	1	0	0	0	0	PA
25	10	40	2	1	0	1	1	0	0	0	0	1	0	0	1	1	0	1	1	0	0	0	0	1	0	0	1	0	PA
32	4	50	0	1	0	1	1	1	0	0	1	0	0	0	0	0	0	1	0	0	0	0	0	0	0	0	0	0	PA
25	10	34	0	1	0	1	1	0	0	0	1	0	0	0	1	0	0	1	0	0	0	0	0	0	0	0	0	0	PA
20	7	65	0	1	0	1	1	0	0	0	1	0	0	0	0	0	0	0	0	0	0	0	0	0	0	0	0	0	PA
30	7	24	0	0	0	1	1	0	0	0	0	1	0	0	1	0	0	1	1	0	0	0	1	1	0	0	1	1	PA
44	8	52	1	0	0	1	1	1	0	1	1	0	0	0	1	0	0	1	0	0	0	1	1	1	0	0	1	1	PA
30	7	24	0	0	0	1	1	0	0	0	0	0	0	0	1	0	0	1	1	0	0	0	1	1	0	0	1	1	PA
46	13	38	0	0	1	0	0	1	0	1	1	0	0	1	1	0	0	1	0	1	0	0	1	1	0	0	1	1	PA
85	8	62	1	1	0	1	1	0	0	1	1	0	0	1	1	0	1	1	1	0	0	0	1	1	1	1	0	1	PA
14	20	49	0	0	1	1	1	0	0	1	0	0	0	1	1	1	0	1	1	1	1	1	1	1	1	1	1	1	PA
25	20	43	0	1	1	0	0	1	0	0	0	1	0	0	1	1	1	1	0	0	0	0	1	1	0	0	1	1	PA
25	20	43	0	1	0	0	0	1	0	0	0	0	1	0	1	1	1	1	0	0	0	0	1	1	0	0	1	1	PA
30	8	67	0	0	0	1	1	0	0	0	0	0	0	0	1	0	0	1	0	0	0	0	0	0	0	0	0	0	PA
62	8	52	0	0	0	0	1	0	1	0	1	0	0	1	1	0	0	1	1	1	0	0	0	0	0	0	0	0	PA
10	5	18	0	1	0	1	1	0	0	0	1	0	0	1	1	0	0	1	1	0	0	0	0	0	0	0	0	0	PA
51	5	44	1	0	0	1	1	0	0	0	1	0	0	1	1	1	0	1	1	0	0	0	0	0	0	0	0	0	PA
34	5	20	0	0	0	0	1	0	0	1	0	0	1	0	1	0	0	0	0	0	0	0	0	0	0	0	0	0	PA
26	10	64	0	0	0	1	1	0	0	0	0	1	0	0	1	0	0	0	0	0	0	0	0	0	0	0	0	0	PA
26	10	66	2	0	0	1	1	0	0	0	0	0	0	0	0	0	0	0	0	0	0	0	0	0	0	0	0	0	PA
34	15	16	0	1	0	0	1	0	0	1	0	1	0	0	1	0	0	1	0	0	0	0	0	0	0	0	0	0	PA
41	8	40	0	0	0	1	0	1	1	0	1	0	0	0	1	0	0	0	0	0	0	0	0	0	0	0	0	0	PA
35	8	32	0	1	0	1	0	1	0	0	0	1	0	0	1	1	0	1	0	0	0	0	0	0	0	0	0	0	PA
48	3	36	2	1	0	0	1	0	0	1	0	0	1	0	0	0	1	0	0	1	0	0	0	0	0	0	0	1	PA
40	17	54	1	0	1	0	1	0	0	0	0	1	0	1	1	0	1	1	1	1	1	1	0	1	0	1	1	1	PA
42	0	62	0	1	0	1	0	1	0	0	0	1	0	0	1	1	0	0	1	0	0	0	0	1	0	0	1	0	PA
51	0	41	0	0	0	0	0	1	0	0	0	0	0	1	1	0	0	0	0	0	0	0	0	0	0	0	0	0	PA
36	1	49	0	0	0	1	1	0	0	1	1	0	0	0	0	0	0	1	0	0	0	0	0	0	0	0	0	0	PA
22	1	56	0	0	1	0	1	1	1	0	1	0	0	0	1	1	0	1	0	0	0	0	1	0	0	0	0	1	PA
32	0	24	0	0	0	1	1	1	0	0	0	0	1	0	1	1	0	1	0	0	0	0	1	1	0	0	1	1	PA
21	7	17	0	1	0	0	1	0	0	0	0	0	0	0	0	0	0	0	0	0	0	0	0	0	0	0	0	0	PA
22	2	14	0	0	0	1	1	0	0	0	0	0	0	0	1	0	0	1	0	0	0	0	1	0	0	0	0	0	PA
64	3	17	0	1	0	0	1	1	0	0	1	0	0	0	1	1	0	0	0	0	0	0	0	0	0	0	0	0	PA
71	0	16	0	1	0	1	0	0	0	0	0	1	0	1	1	0	0	0	1	0	0	0	0	0	0	1	0	0	PA
71	8	16	0	1	1	1	0	0	0	0	0	1	0	1	1	0	0	1	1	0	0	0	0	0	0	1	0	1	PA
31	2	42	0	1	0	0	1	0	0	1	0	1	0	0	1	1	0	0	1	1	1	0	0	0	0	0	0	0	PA
25	3	21	0	1	0	1	1	0	0	1	0	1	0	1	0	0	0	1	1	0	0	0	0	0	0	0	0	1	PA
13	3	50	0	1	0	1	0	0	0	0	1	0	0	0	1	0	0	0	0	0	0	0	0	0	0	0	0	0	PA
40	0	61	0	1	0	1	1	0	0	0	0	0	0	0	1	0	1	1	1	0	0	0	0	0	0	0	0	1	PA
27	8	50	0	1	0	0	1	1	0	0	1	0	0	0	0	1	0	1	0	0	0	0	0	0	0	0	0	0	PA
26	8	43	0	1	0	0	1	1	0	1	0	0	0	0	0	0	1	1	0	0	0	0	0	1	0	0	0	1	PA
49	14	31	0	1	1	1	1	0	1	0	0	0	1	1	1	0	0	1	0	1	0	0	0	0	0	0	0	1	PA
21	8	29	0	1	1	0	1	1	0	0	0	0	0	0	1	1	1	1	1	1	0	1	0	0	0	1	0	1	PA
17	7	37	0	1	0	1	0	0	0	1	0	1	0	1	1	1	0	1	1	0	0	0	0	0	0	0	0	0	PA
23	5	18	1	1	0	1	1	0	0	0	1	0	0	1	1	0	1	1	0	0	0	0	1	0	1	0	0	1	PA
19	6	19	0	1	0	1	1	0	0	0	0	0	0	1	1	0	0	1	0	0	0	0	0	0	0	0	0	0	PA
26	1	45	0	0	0	1	1	0	0	0	0	0	1	1	1	0	0	1	0	1	0	0	0	0	0	0	0	0	PA
25	7	13	1	1	0	0	1	1	0	0	1	0	0	0	0	0	0	1	0	0	0	0	0	0	0	0	0	0	PA
26	7	52	2	1	0	0	1	0	1	1	1	0	0	0	0	0	0	1	0	0	0	0	0	0	0	0	0	0	PA
13	2	32	0	1	0	1	1	0	0	0	1	0	0	0	0	0	0	0	0	0	0	0	0	0	0	0	0	0	PA
55	7	58	1	1	0	1	1	0	1	0	1	0	0	1	1	0	0	1	1	0	1	0	0	0	0	0	0	0	PA
53	5	9	2	0	0	0	1	0	0	1	0	0	0	0	0	0	0	0	0	0	0	0	0	0	0	0	0	0	PA
28	0	32	0	0	0	1	1	0	0	0	0	0	1	0	0	0	0	0	0	0	0	0	0	0	0	0	0	0	PA
21	7	40	0	0	0	1	1	0	0	0	0	0	0	1	0	0	0	0	0	0	0	0	0	0	0	0	0	0	PA
21	0	40	0	0	0	1	1	0	0	0	1	0	0	1	0	1	0	0	0	0	0	0	0	0	0	0	0	0	PA
20	3	46	0	0	0	1	1	0	1	0	1	0	0	1	1	1	0	1	0	0	0	0	0	0	0	0	0	0	PA
20	5	33	1	1	0	1	1	0	0	0	1	0	0	1	1	0	0	0	0	0	0	0	0	0	0	0	0	0	PA
29	4	41	0	0	0	1	1	0	0	0	1	0	0	0	1	0	0	1	0	0	0	0	0	0	0	0	0	0	PA
36	3	52	0	1	0	1	1	0	0	1	0	0	1	1	1	1	1	1	1	1	0	0	0	1	0	1	1	1	PA
34	8	50	1	0	0	1	0	0	0	1	0	0	0	1	1	0	0	1	1	0	0	0	0	0	0	0	0	0	PA
35	15	50	0	1	0	1	1	0	0	0	1	0	0	0	0	1	0	1	0	0	0	0	0	0	0	0	0	1	PA
45	16	55	0	0	0	1	1	0	0	0	1	0	0	0	0	1	0	1	0	0	0	0	0	0	0	0	0	1	PA
25	7	56	1	0	0	1	1	0	0	0	1	0	0	0	0	1	0	1	0	0	0	0	0	0	0	0	0	1	PA
14	11	61	0	1	0	1	1	0	0	1	0	0	0	0	0	1	0	1	0	0	0	0	0	1	0	0	0	1	PA
37	9	35	1	1	0	0	1	1	0	1	0	0	0	0	1	1	0	1	0	0	0	0	1	0	0	0	0	1	PA
